# Supplementary material for: Chemical and redox non-innocence in low-valent molybdenum β diketonate complexes: novel pathways for CO 2 and CS 2 activation
Source: Royal Society of Chemistry journal article supplement (doi:10.1039/d4sc03496a), 2024-01-01
Supplement: d4sc03496a1.pdf [file d4sc03496a1.pdf]

# Chemical and Redox Non-Innocence in Low-Valent Molybdenum $\beta$ -Diketonate Complexes: Novel Pathways for CO<sub>2</sub> and CS<sub>2</sub> Activation

Fabio Masero<sup>[a]</sup>, Prof. Dr. Victor Mougel<sup>\*[a]</sup>

[a] Laboratory of Inorganic Chemistry (LAC), Department of Chemistry and Applied Biosciences (D-CHAB), ETH Zurich, Vladimir-Prelog Weg 2, 8093 Zurich, Switzerland.  
Email: mougel@inorg.chem.ethz.ch

## Supporting Information

### Table of Content:

|                                                                                                                                                                    |    |
|--------------------------------------------------------------------------------------------------------------------------------------------------------------------|----|
| 1. Experimental .....                                                                                                                                              | 6  |
| 1.1 General Information .....                                                                                                                                      | 6  |
| 2. Synthesis of Isolated Compounds .....                                                                                                                           | 8  |
| 2.1 Homoleptic Mo(III) Complexes .....                                                                                                                             | 8  |
| 2.1.1 Synthesis of [Mo <sup>III</sup> ( <sup>Me</sup> diket) <sub>3</sub> ] (1) .....                                                                              | 8  |
| 2.1.2 [Mo <sup>III</sup> ( <sup>tBu</sup> diket) <sub>3</sub> ] (3) .....                                                                                          | 8  |
| 2.2 Homoleptic Mo(IV) Complexes .....                                                                                                                              | 8  |
| 2.2.1 [Mo <sup>IV</sup> ( <sup>Me</sup> diket) <sub>3</sub> ]PF <sub>6</sub> (2) .....                                                                             | 8  |
| 2.2.2 [Mo <sup>IV</sup> ( <sup>tBu</sup> diket) <sub>3</sub> ]PF <sub>6</sub> (4) .....                                                                            | 9  |
| 2.3 Mo(II) Complexes .....                                                                                                                                         | 9  |
| 2.3.1 K[Mo <sup>II</sup> ( <sup>tBu</sup> diket) <sub>3</sub> ] (5) .....                                                                                          | 9  |
| 2.3.2 K(18-crown-6) <sub>0.5</sub> (thf) <sub>2</sub> [Mo <sup>II</sup> ( <sup>tBu</sup> diket) <sub>3</sub> ] (5·(18-c-6) <sub>1/2</sub> ) .....                  | 9  |
| 2.3.3 K(15-crown-5)[Mo <sup>II</sup> ( <sup>tBu</sup> diket) <sub>3</sub> ] (5·(15-c-5)) .....                                                                     | 10 |
| 2.3.4 Attempted Preparation of Na[Mo( <sup>Me</sup> diket) <sub>3</sub> ] by Reduction of [Mo( <sup>Me</sup> diket) <sub>3</sub> ] with Sodium Naphthalenide ..... | 10 |
| 2.4 Synthesis of Bis( <sup>R</sup> diket) Complexes .....                                                                                                          | 10 |
| 2.4.1 [Mo <sup>II</sup> ( <sup>tBu</sup> diket) <sub>2</sub> (py) <sub>2</sub> ] .....                                                                             | 10 |
| 2.4.2 [Mo <sup>II</sup> ( <sup>tBu</sup> diket) <sub>2</sub> (PEt <sub>3</sub> ) <sub>2</sub> ] .....                                                              | 10 |
| 2.4.3 [Mo <sup>II</sup> ( <sup>Me</sup> diket) <sub>2</sub> (py) <sub>2</sub> ] .....                                                                              | 11 |
| 2.4.4 [Mo <sup>II</sup> ( <sup>Me</sup> diket) <sub>2</sub> (PEt <sub>3</sub> ) <sub>2</sub> ] .....                                                               | 11 |
| 2.5 Synthesis of K[ <sup>tBu</sup> diket] .....                                                                                                                    | 11 |
| 2.5.1 Synthesis of K[ <sup>tBu</sup> diket] .....                                                                                                                  | 11 |
| 2.6 Reaction of K[Mo( <sup>tBu</sup> diket) <sub>3</sub> ] with CO <sub>2</sub> .....                                                                              | 11 |
| 2.6.1 Synthesis of K <sub>2</sub> [Mo( <sup>tBu</sup> diket) <sub>2</sub> ( <sup>tBu</sup> diket· <sup>12</sup> CO <sub>2</sub> )] (6) .....                       | 11 |
| 2.6.2 Synthesis of K <sub>2</sub> [Mo( <sup>tBu</sup> diket) <sub>2</sub> ( <sup>tBu</sup> diket· <sup>13</sup> CO <sub>2</sub> )] ( <sup>13</sup> C6) .....       | 12 |
| 2.6.3 Synthesis of K <sub>2</sub> [Mo( <sup>tBu</sup> diket) <sub>2</sub> ( <sup>tBu</sup> diket·CO <sub>2</sub> )] using Excess KC <sub>8</sub> .....             | 12 |
| 2.7 Chemical Reduction with CS <sub>2</sub> .....                                                                                                                  | 12 |
| 2.7.1 Reduction with 5 .....                                                                                                                                       | 12 |
| 2.7.2 Reduction with K <sup>0</sup> .....                                                                                                                          | 13 |

|        |                                                                                                      |    |
|--------|------------------------------------------------------------------------------------------------------|----|
| 3.     | Additional Reactivity Studies.....                                                                   | 14 |
| 3.1    | Reactivity of Chemically Reduced [Mo( <sup>Me</sup> diket) <sub>3</sub> ] with CO <sub>2</sub> ..... | 14 |
| 3.2    | Reactivity of K[Mo( <sup>tBu</sup> diket) <sub>3</sub> ] with CS <sub>2</sub> .....                  | 14 |
| 3.2.1  | In the Absence of 18-Crown-6.....                                                                    | 14 |
| 3.2.2  | In the Presence of 18-Crown-6.....                                                                   | 15 |
| 3.3    | Deuteration of [Mo( <sup>Me</sup> diket) <sub>3</sub> ] .....                                        | 17 |
| 3.4    | Reactivity Studies of 6 .....                                                                        | 18 |
| 3.5    | Reactivity of K[ <sup>tBu</sup> diket] with CS <sub>2</sub> .....                                    | 19 |
| 3.5.1  | Procedure .....                                                                                      | 19 |
| 4.     | XRD Data.....                                                                                        | 20 |
| 4.1    | General Procedure .....                                                                              | 20 |
| 4.2    | Refinement Details.....                                                                              | 20 |
| 5.     | NMR Spectroscopy .....                                                                               | 26 |
| 5.1    | NMR Spectra of Isolated Metal Complexes .....                                                        | 26 |
| 5.1.1  | Mo(IV) Complexes .....                                                                               | 26 |
| 5.1.2  | Mo(III) Complexes .....                                                                              | 28 |
| 5.1.3  | Mo(II) Complexes .....                                                                               | 29 |
| 5.2    | NMR Spectra of Reaction with CO <sub>2</sub> .....                                                   | 31 |
| 5.3    | NMR Spectra of Reaction with CS <sub>2</sub> .....                                                   | 32 |
| 5.4    | Reactivity Studies.....                                                                              | 33 |
| 5.4.1  | <sup>13</sup> C <sub>6</sub> + <sup>tBu</sup> diketH.....                                            | 33 |
| 5.4.2  | <sup>13</sup> C <sub>6</sub> in Methanol- <i>d</i> <sub>4</sub> .....                                | 34 |
| 5.4.3  | <sup>13</sup> C <sub>6</sub> in D <sub>2</sub> O .....                                               | 35 |
| 5.4.4  | 1 + KC <sub>8</sub> under CO <sub>2</sub> .....                                                      | 35 |
| 5.5    | Additional Spectra.....                                                                              | 36 |
| 6.     | UV-Vis Spectra.....                                                                                  | 37 |
| 6.1    | <sup>Me</sup> diket Supported Complexes .....                                                        | 37 |
| 6.2    | <sup>tBu</sup> diket Supported Complexes.....                                                        | 37 |
| 7.     | Infrared (IR) Spectroscopy.....                                                                      | 41 |
| 7.1    | Reactivity of 5 with <sup>12/13</sup> CO <sub>2</sub> .....                                          | 41 |
| 7.1.1  | Spectra.....                                                                                         | 41 |
| 7.2    | Reactivity of 5 with <sup>12/13</sup> CS <sub>2</sub> .....                                          | 42 |
| 7.2.1  | Procedure .....                                                                                      | 42 |
| 7.2.2  | Spectra.....                                                                                         | 42 |
| 8.     | EPR Spectroscopy.....                                                                                | 44 |
| 8.1    | EPR Spectrum of 6.....                                                                               | 44 |
| 9.     | Theoretical Calculation of 6 .....                                                                   | 45 |
| 9.1    | Method .....                                                                                         | 45 |
| 9.2    | Spin Density Plot .....                                                                              | 45 |
| 9.3    | Coordinates of Optimized Geometry .....                                                              | 46 |
| 10.    | Electrochemistry.....                                                                                | 49 |
| 10.1   | CV Studies .....                                                                                     | 49 |
| 10.1.1 | CV of 1.....                                                                                         | 49 |
| 10.1.2 | CV of 2.....                                                                                         | 51 |
| 10.1.3 | CV of 3.....                                                                                         | 51 |

|        |                                                                              |    |
|--------|------------------------------------------------------------------------------|----|
| 10.1.4 | CV of 6.....                                                                 | 53 |
| 10.2   | Controlled Potential Electrolysis (CPE) under CO <sub>2</sub> .....          | 53 |
| 10.2.1 | Attempted Product Identification .....                                       | 54 |
| 10.3   | Controlled Potential Electrolysis (CPE) in Presence of CS <sub>2</sub> ..... | 54 |
| 10.3.1 | Product Analysis .....                                                       | 55 |
| 11.    | Proposed Reaction Mechanism .....                                            | 57 |
| 12.    | References.....                                                              | 58 |

### Index Supporting Schemes:

|                   |                                                                                                                                   |    |
|-------------------|-----------------------------------------------------------------------------------------------------------------------------------|----|
| <b>Scheme S1:</b> | Attempts to isolate and valorize the carboxylated ligand [ <sup>t</sup> Bu diket·CO <sub>2</sub> ] <sup>-</sup> of <b>6</b> ..... | 18 |
| <b>Scheme S2:</b> | Proposed mechanistic pathways for the formation of <b>6</b> vs. K <sub>2</sub> [C <sub>2</sub> S <sub>4</sub> ]. .....            | 57 |

### Index Supporting Figures

|                    |                                                                                                                                                                                                                                                                                                                                                                                                                                                                   |    |
|--------------------|-------------------------------------------------------------------------------------------------------------------------------------------------------------------------------------------------------------------------------------------------------------------------------------------------------------------------------------------------------------------------------------------------------------------------------------------------------------------|----|
| <b>Figure S1:</b>  | <sup>13</sup> C NMR spectrum in pyridine- <i>d</i> <sub>5</sub> of the crude reaction mixture (pyridine-extraction) after reduction with K <sup>0</sup> .....                                                                                                                                                                                                                                                                                                     | 13 |
| <b>Figure S2:</b>  | UV-Vis spectrum (normalized by concentration [mg·mL <sup>-1</sup> ]) in pyridine of the crude reaction mixture after stoichiometric reduction with K <sup>0</sup> ( <i>solid grey line</i> ). The spectrum of isolated [K(18-crown-6)] <sub>2</sub> [C <sub>2</sub> S <sub>4</sub> ] is displayed for comparison ( <i>dashed line</i> ).....                                                                                                                      | 13 |
| <b>Figure S3:</b>  | <sup>1</sup> H NMR spectrum of the THF- <i>d</i> <sub>8</sub> filtrate. ....                                                                                                                                                                                                                                                                                                                                                                                      | 14 |
| <b>Figure S4:</b>  | <sup>13</sup> C NMR spectrum of the THF- <i>d</i> <sub>8</sub> solid, dissolved in methanol- <i>d</i> <sub>4</sub> . ....                                                                                                                                                                                                                                                                                                                                         | 15 |
| <b>Figure S5:</b>  | <sup>1</sup> H NMR spectrum of the THF- <i>d</i> <sub>8</sub> filtrate. ....                                                                                                                                                                                                                                                                                                                                                                                      | 15 |
| <b>Figure S6:</b>  | <sup>13</sup> C NMR spectrum of the THF- <i>d</i> <sub>8</sub> solid, dissolved in methanol- <i>d</i> <sub>4</sub> . ....                                                                                                                                                                                                                                                                                                                                         | 16 |
| <b>Figure S7:</b>  | <sup>Me</sup> diket ligand deuteration monitored by <sup>1</sup> H NMR spectroscopy: <b>1</b> in MeCN- <i>d</i> <sub>3</sub> ( <i>black, top</i> ), <b>1</b> + [TBA] <sub>2</sub> [oxalate] in MeCN- <i>d</i> <sub>3</sub> stirred for 24 h ( <i>red</i> ), <b>1</b> in methanol- <i>d</i> <sub>4</sub> , stirred for 24 h ( <i>orange</i> ) and <b>1</b> reduced with KC <sub>8</sub> under CO <sub>2</sub> in MeCN- <i>d</i> <sub>3</sub> ( <i>blue</i> ). .... | 17 |
| <b>Figure S8:</b>  | <sup>13</sup> C NMR spectrum in THF- <i>d</i> <sub>8</sub> of K[ <sup>t</sup> Bu diket] + <sup>13</sup> CS <sub>2</sub> (10 equiv.). ....                                                                                                                                                                                                                                                                                                                         | 19 |
| <b>Figure S9:</b>  | <sup>13</sup> C NMR spectrum in THF- <i>d</i> <sub>8</sub> of K[ <sup>t</sup> Bu diket] + <sup>13</sup> CS <sub>2</sub> (10 equiv.) after addition of methanol- <i>d</i> <sub>4</sub> .....                                                                                                                                                                                                                                                                       | 19 |
| <b>Figure S10:</b> | <sup>1</sup> H NMR spectrum of [Mo( <sup>Me</sup> diket) <sub>3</sub> ]PF <sub>6</sub> in MeCN- <i>d</i> <sub>3</sub> .....                                                                                                                                                                                                                                                                                                                                       | 26 |
| <b>Figure S11:</b> | <sup>19</sup> F NMR spectrum of [Mo( <sup>Me</sup> diket) <sub>3</sub> ]PF <sub>6</sub> in MeCN- <i>d</i> <sub>3</sub> . ....                                                                                                                                                                                                                                                                                                                                     | 26 |
| <b>Figure S12:</b> | <sup>31</sup> P NMR spectrum of [Mo( <sup>Me</sup> diket) <sub>3</sub> ]PF <sub>6</sub> in MeCN- <i>d</i> <sub>3</sub> .....                                                                                                                                                                                                                                                                                                                                      | 26 |
| <b>Figure S13:</b> | <sup>1</sup> H NMR spectrum of [Mo( <sup>t</sup> Bu diket) <sub>3</sub> ]PF <sub>6</sub> in MeCN- <i>d</i> <sub>3</sub> .....                                                                                                                                                                                                                                                                                                                                     | 27 |
| <b>Figure S14:</b> | <sup>19</sup> F NMR spectrum of [Mo( <sup>t</sup> Bu diket) <sub>3</sub> ]PF <sub>6</sub> in MeCN- <i>d</i> <sub>3</sub> .....                                                                                                                                                                                                                                                                                                                                    | 27 |
| <b>Figure S15:</b> | <sup>31</sup> P NMR spectrum of [Mo( <sup>t</sup> Bu diket) <sub>3</sub> ]PF <sub>6</sub> in MeCN- <i>d</i> <sub>3</sub> .....                                                                                                                                                                                                                                                                                                                                    | 27 |
| <b>Figure S16:</b> | <sup>1</sup> H NMR spectrum of [Mo( <sup>Me</sup> diket) <sub>3</sub> ] in MeCN- <i>d</i> <sub>3</sub> .....                                                                                                                                                                                                                                                                                                                                                      | 28 |
| <b>Figure S17:</b> | <sup>1</sup> H NMR spectrum of [Mo( <sup>t</sup> Bu diket) <sub>3</sub> ] in benzene- <i>d</i> <sub>6</sub> .....                                                                                                                                                                                                                                                                                                                                                 | 28 |
| <b>Figure S18:</b> | <sup>1</sup> H NMR spectrum of [Mo( <sup>t</sup> Bu diket) <sub>3</sub> ] in dichloromethane- <i>d</i> <sub>2</sub> . ....                                                                                                                                                                                                                                                                                                                                        | 29 |
| <b>Figure S19:</b> | <sup>1</sup> H NMR spectrum of K(18-crown-6) <sub>0.5</sub> (thf)[Mo( <sup>t</sup> Bu diket) <sub>3</sub> ] in THF- <i>d</i> <sub>8</sub> . ....                                                                                                                                                                                                                                                                                                                  | 29 |
| <b>Figure S20:</b> | <sup>1</sup> H NMR spectrum of K(15-crown-5)[Mo( <sup>t</sup> Bu diket) <sub>3</sub> ] in benzene- <i>d</i> <sub>6</sub> . ....                                                                                                                                                                                                                                                                                                                                   | 30 |
| <b>Figure S21:</b> | <sup>1</sup> H NMR spectrum of [Mo( <sup>t</sup> Bu diket) <sub>2</sub> (py) <sub>2</sub> ] in benzene- <i>d</i> <sub>6</sub> . ....                                                                                                                                                                                                                                                                                                                              | 30 |
| <b>Figure S22:</b> | <sup>1</sup> H NMR spectrum of crude K <sub>2</sub> [Mo( <sup>t</sup> Bu diket) <sub>2</sub> ( <sup>t</sup> Bu diket·CO <sub>2</sub> )] in THF- <i>d</i> <sub>8</sub> .....                                                                                                                                                                                                                                                                                       | 31 |
| <b>Figure S23:</b> | <sup>1</sup> H NMR spectrum of recrystallized K <sub>2</sub> [Mo( <sup>t</sup> Bu diket) <sub>2</sub> ( <sup>t</sup> Bu diket·CO <sub>2</sub> )] in THF- <i>d</i> <sub>8</sub> .....                                                                                                                                                                                                                                                                              | 31 |
| <b>Figure S24:</b> | <sup>1</sup> H NMR spectrum of recrystallized [K(18-crown-6)] <sub>2</sub> [C <sub>2</sub> S <sub>4</sub> ] in Py- <i>d</i> <sub>5</sub> .....                                                                                                                                                                                                                                                                                                                    | 32 |
| <b>Figure S25:</b> | <sup>13</sup> C NMR spectrum of recrystallized [K(18-crown-6)] <sub>2</sub> [C <sub>2</sub> S <sub>4</sub> ] in Py- <i>d</i> <sub>5</sub> . ....                                                                                                                                                                                                                                                                                                                  | 32 |
| <b>Figure S26:</b> | <sup>13</sup> C NMR spectrum of K[ <sup>t</sup> Bu diket] in THF- <i>d</i> <sub>8</sub> .....                                                                                                                                                                                                                                                                                                                                                                     | 32 |
| <b>Figure S27:</b> | <sup>13</sup> C NMR spectrum of <sup>13</sup> C <b>6</b> + <sup>t</sup> Bu diketH in THF- <i>d</i> <sub>8</sub> after 8 h at ambient temperature. ....                                                                                                                                                                                                                                                                                                            | 33 |
| <b>Figure S28:</b> | <sup>13</sup> C NMR spectrum of K[ <sup>t</sup> Bu diket] in THF- <i>d</i> <sub>8</sub> under <sup>13</sup> CO <sub>2</sub> (1 atm). ....                                                                                                                                                                                                                                                                                                                         | 33 |
| <b>Figure S29:</b> | <sup>13</sup> C NMR spectrum of <sup>13</sup> C <b>6</b> in methanol- <i>d</i> <sub>4</sub> after 8 h at ambient temperature.....                                                                                                                                                                                                                                                                                                                                 | 34 |
| <b>Figure S30:</b> | <sup>1</sup> H NMR spectrum of <sup>13</sup> C <b>6</b> in methanol- <i>d</i> <sub>4</sub> after 10 min ( <i>maroon, top trace</i> ), after 8 h ( <i>dark blue, middle trace</i> ) at ambient temperature, and after washing with <sup>n</sup> pentane ( <i>light blue, bottom trace</i> ).....                                                                                                                                                                   | 34 |
| <b>Figure S31:</b> | <sup>13</sup> C NMR spectrum of <sup>13</sup> C <b>6</b> suspended in D <sub>2</sub> O (without filtration). The chemical shift was reference using the residual THF signals. ....                                                                                                                                                                                                                                                                                | 35 |

|                                                                                                                                                                                                                                                                                                                                                                                                                                                                                                                                                                                                                                                                                                                          |    |
|--------------------------------------------------------------------------------------------------------------------------------------------------------------------------------------------------------------------------------------------------------------------------------------------------------------------------------------------------------------------------------------------------------------------------------------------------------------------------------------------------------------------------------------------------------------------------------------------------------------------------------------------------------------------------------------------------------------------------|----|
| <b>Figure S32:</b> $^{13}\text{C}$ NMR spectra of <b>1</b> + $\text{KC}_8$ (1 equiv.) in methanol- $d_4$ under $^{12}\text{CO}_2$ (1 atm, <i>light blue</i> , top trace) and $^{13}\text{CO}_2$ (1 atm, <i>dark blue</i> , bottom trace). .....                                                                                                                                                                                                                                                                                                                                                                                                                                                                          | 35 |
| <b>Figure S33:</b> $^1\text{H}$ NMR spectrum of $\text{K}[\text{Mo}(\text{}^t\text{Bu}\text{diket})_3]$ (crude) in benzene- $d_6$ . Small amounts of <b>3</b> (indicated within the spectrum) could be removed by treatment with crown ether (18-crown-6 or 15-crown-5) which allowed for purification by recrystallization (see Figure S19 and Figure S20). .....                                                                                                                                                                                                                                                                                                                                                       | 36 |
| <b>Figure S34:</b> UV-Vis spectrum of $[\text{Mo}(\text{}^{\text{Me}}\text{diket})_3]\text{PF}_6$ in MeCN ( $d = 2$ mm). .....                                                                                                                                                                                                                                                                                                                                                                                                                                                                                                                                                                                           | 37 |
| <b>Figure S35:</b> UV-Vis spectrum of $[\text{Mo}(\text{}^t\text{Bu}\text{diket})_3]\text{PF}_6$ in THF ( $d = 2$ mm). .....                                                                                                                                                                                                                                                                                                                                                                                                                                                                                                                                                                                             | 37 |
| <b>Figure S36:</b> UV-Vis spectrum of $[\text{Mo}(\text{}^t\text{Bu}\text{diket})_3]$ in THF ( $d = 2$ mm). .....                                                                                                                                                                                                                                                                                                                                                                                                                                                                                                                                                                                                        | 37 |
| <b>Figure S37:</b> UV-Vis spectrum of $\text{K}[\text{Mo}(\text{}^t\text{Bu}\text{diket})_3]$ in THF ( $d = 2$ mm). .....                                                                                                                                                                                                                                                                                                                                                                                                                                                                                                                                                                                                | 38 |
| <b>Figure S38:</b> UV-Vis spectrum of $\text{K}(15\text{-crown-5})[\text{Mo}(\text{}^t\text{Bu}\text{diket})_3]$ in THF ( $d = 2$ mm). .....                                                                                                                                                                                                                                                                                                                                                                                                                                                                                                                                                                             | 38 |
| <b>Figure S39:</b> UV-Vis spectrum of $\text{K}(18\text{-crown-6})[\text{Mo}(\text{}^t\text{Bu}\text{diket})_3]$ in THF ( $d = 2$ mm). .....                                                                                                                                                                                                                                                                                                                                                                                                                                                                                                                                                                             | 38 |
| <b>Figure S40:</b> UV-Vis spectrum of $\text{K}_2[\text{Mo}(\text{}^t\text{Bu}\text{diket})_2(\text{}^t\text{Bu}\text{diket}\cdot\text{CO}_2)]$ in THF ( $d = 2$ mm). .....                                                                                                                                                                                                                                                                                                                                                                                                                                                                                                                                              | 39 |
| <b>Figure S41:</b> Overlaid UV-Vis spectra of $[\text{Mo}(\text{}^t\text{Bu}\text{diket})_3]$ , $\text{K}[\text{Mo}(\text{}^t\text{Bu}\text{diket})_3]$ and $\text{K}_2[\text{Mo}(\text{}^t\text{Bu}\text{diket})_2(\text{}^t\text{Bu}\text{diket}\cdot\text{CO}_2)]$ , respectively, in THF ( $d = 2$ mm). .....                                                                                                                                                                                                                                                                                                                                                                                                        | 39 |
| <b>Figure S42:</b> UV-Vis spectrum of $[\text{Mo}(\text{}^t\text{Bu}\text{diket})_2(\text{py})_2]$ in THF ( $d = 2$ mm). .....                                                                                                                                                                                                                                                                                                                                                                                                                                                                                                                                                                                           | 39 |
| <b>Figure S43:</b> UV-Vis spectrum of $[\text{Mo}(\text{}^t\text{Bu}\text{diket})_2(\text{PEt}_3)_2]$ in THF ( $d = 2$ mm). .....                                                                                                                                                                                                                                                                                                                                                                                                                                                                                                                                                                                        | 40 |
| <b>Figure S44:</b> UV-Vis spectrum of $[\text{K}(18\text{-crown-6})_2]$ in MeCN ( <i>left</i> ) and pyridine ( <i>right</i> ) ( $d = 2$ mm). .....                                                                                                                                                                                                                                                                                                                                                                                                                                                                                                                                                                       | 40 |
| <b>Figure S45:</b> IR spectra of $[\text{Mo}(\text{}^t\text{Bu}\text{diket})_3]$ ( <i>top, red</i> ), $\text{K}[\text{Mo}(\text{}^t\text{Bu}\text{diket})_3]$ ( <i>middle, light turquoise</i> ), and $\text{K}_2[\text{Mo}(\text{}^t\text{Bu}\text{diket})_2(\text{}^t\text{Bu}\text{diket}\cdot^{12}\text{CO}_2)]$ ( <i>bottom, green</i> ). .....                                                                                                                                                                                                                                                                                                                                                                     | 41 |
| <b>Figure S46:</b> IR spectra of $\text{K}_2[\text{Mo}(\text{}^t\text{Bu}\text{diket})_2(\text{}^t\text{Bu}\text{diket}\cdot^{12}\text{CO}_2)]$ ( <i>top, green</i> ), and $\text{K}_2[\text{Mo}(\text{}^t\text{Bu}\text{diket})_2(\text{}^t\text{Bu}\text{diket}\cdot^{13}\text{CO}_2)]$ ( <i>middle, turquoise</i> ). The subtraction of the two spectra is displayed below ( <i>light blue</i> ). .....                                                                                                                                                                                                                                                                                                               | 41 |
| <b>Figure S47:</b> IR spectra of chemically reduced <b>1</b> exposed to $^{12}\text{CO}_2$ ( <i>top, green</i> ), and $^{13}\text{CO}_2$ ( <i>middle, turquoise</i> ). The subtraction of the two spectra is displayed below ( <i>light blue</i> ). .....                                                                                                                                                                                                                                                                                                                                                                                                                                                                | 42 |
| <b>Figure S48:</b> FT-IR spectra of reactivity studies with $^{12/13}\text{CS}_2$ (KBr pellet). The spectrum in <i>light blue</i> corresponds to the subtraction of the spectra obtained from $\text{K}[\text{Mo}(\text{}^t\text{Bu}\text{diket})_3] + ^{12}\text{CS}_2$ ( <i>yellow</i> ) and $\text{K}[\text{Mo}(\text{}^t\text{Bu}\text{diket})_3] + ^{13}\text{CS}_2$ ( <i>orange</i> ). The spectra of $\text{K}[\text{Mo}(\text{}^t\text{Bu}\text{diket})_3]$ ( <i>turquoise</i> ), $[\text{Mo}(\text{}^t\text{Bu}\text{diket})_3]$ ( <i>red</i> ) and $[\text{K}(18\text{-crown-6})_2][\text{C}_2\text{S}_4]$ were obtained from independently isolated compounds. More details are given in the text above. .... | 43 |
| <b>Figure S49:</b> X-Band EPR spectrum of $\text{K}_2[\text{Mo}(\text{}^t\text{Bu}\text{diket})_2(\text{}^t\text{Bu}\text{diket}\cdot\text{CO}_2)]$ ( <i>black</i> ) and its simulated spectrum ( <i>blue</i> ). Collection parameters: $c = 2$ mM (in 2-MeTHF), $T = 20$ K, microwave frequency 9.5 GHz. Simulation parameters: $S = 1/2$ , $g = (1.994, 1.979, 1.932)$ , $A(^{95/97}\text{Mo}) = (63.6, 48.8, 73.3)$ with $g$ -strains of (0.026, 0.023, 0.035) and $A$ -strains of (37.4, 59.4, 94.9). .....                                                                                                                                                                                                          | 44 |
| <b>Figure S50:</b> Qualitative molecular orbital diagram of $[\text{Mo}(\text{}^t\text{Bu}\text{diket})_2(\text{}^t\text{Bu}\text{diket}\cdot\text{CO}_2)]^{2-}$ with the most relevant molybdenum-based molecular orbitals ( <i>black boxes</i> ) and the spin density ( <i>orange box</i> ). .....                                                                                                                                                                                                                                                                                                                                                                                                                     | 45 |
| <b>Figure S51:</b> CV (scan rate $\nu = 100$ $\text{mV}\cdot\text{s}^{-1}$ , 2 <sup>nd</sup> scan) of $[\text{Mo}(\text{}^{\text{Me}}\text{diket})_3]$ (1 mM) in $\text{TBAPF}_6/\text{MeCN}$ (0.1 M). A $\text{TBAPF}_6/\text{MeCN}$ (0.1 M) background measurement is displayed as a grey dotted line, formal Mo oxidation states are indicated in black. ....                                                                                                                                                                                                                                                                                                                                                         | 49 |
| <b>Figure S52:</b> CV of $[\text{Mo}(\text{}^{\text{Me}}\text{diket})_3]$ (1 mM) in $\text{TBAPF}_6/\text{MeCN}$ (0.1 M) with varying scan rate $\nu$ (see Figure legend) of the Mo(III)/Mo(II) ( <i>left</i> ) and of the Mo(III)/Mo(IV) redox couple ( <i>right</i> ). .....                                                                                                                                                                                                                                                                                                                                                                                                                                           | 49 |
| <b>Figure S53:</b> Randles-Ševčík plot of $[\text{Mo}(\text{}^{\text{Me}}\text{diket})_3]$ (1 mM) in $\text{TBAPF}_6/\text{MeCN}$ (0.1 M) of the Mo(III)/Mo(II) ( <i>left</i> ) and of the Mo(III)/Mo(IV) redox couple ( <i>right</i> ). .....                                                                                                                                                                                                                                                                                                                                                                                                                                                                           | 50 |
| <b>Figure S54:</b> CV (2 <sup>nd</sup> scan) of $[\text{Mo}(\text{}^{\text{Me}}\text{diket})_3]$ (1 mM) in $\text{TBAPF}_6/\text{MeCN}$ (0.1 M) under argon ( <i>black trace</i> ) and under $\text{CO}_2$ ( <i>light blue trace</i> ) at $\nu = 20$ $\text{mV}\cdot\text{s}^{-1}$ ( <i>left</i> ) and $\nu = 100$ $\text{mV}\cdot\text{s}^{-1}$ ( <i>right</i> ). .....                                                                                                                                                                                                                                                                                                                                                 | 50 |
| <b>Figure S55:</b> CV (2 <sup>nd</sup> scan) of $[\text{Mo}(\text{}^{\text{Me}}\text{diket})_3]$ (1 mM) in $\text{TBAPF}_6/\text{MeCN}$ (0.1 M) under argon ( <i>black trace</i> ) and in presence of 1 equiv. of $\text{CS}_2$ ( <i>yellow trace</i> ) at $\nu = 20$ $\text{mV}\cdot\text{s}^{-1}$ ( <i>left</i> ) and $\nu = 100$ $\text{mV}\cdot\text{s}^{-1}$ ( <i>right</i> ). .....                                                                                                                                                                                                                                                                                                                                | 51 |
| <b>Figure S56:</b> CV of $[\text{Mo}^{\text{III}}(\text{}^{\text{Me}}\text{diket})_3]$ ( <i>black trace</i> ) and $[\text{Mo}^{\text{VI}}(\text{}^{\text{Me}}\text{diket})_3]\text{PF}_6$ ( <i>orange trace</i> ) at a scan rate $\nu = 100$ $\text{mV}\cdot\text{s}^{-1}$ in $\text{TBAPF}_6/\text{MeCN}$ (0.1 M). .....                                                                                                                                                                                                                                                                                                                                                                                                | 51 |
| <b>Figure S57:</b> CV (scan rate $\nu = 100$ $\text{mV}\cdot\text{s}^{-1}$ , 2 <sup>nd</sup> scan) of $[\text{Mo}(\text{}^t\text{Bu}\text{diket})_3]$ in $\text{TBAPF}_6/\text{MeCN}$ (0.1 M) ( <i>left</i> ) $\text{TBAPF}_6/\text{THF}$ (0.1 M) ( <i>right</i> ). A $\text{TBAPF}_6/\text{MeCN}$ (0.1 M) and $\text{TBAPF}_6/\text{THF}$ (0.1 M) background measurement is displayed as a grey dotted line, formal Mo oxidation states are indicated in black. Note that the solubility of $[\text{Mo}(\text{}^t\text{Bu}\text{diket})_3]$ in $\text{TBAPF}_6/\text{MeCN}$ (0.1 M) is $< 1$ mM. ....                                                                                                                   | 51 |
| <b>Figure S58:</b> CV of $[\text{Mo}(\text{}^t\text{Bu}\text{diket})_3]$ (1 mM) in $\text{TBAPF}_6/\text{THF}$ (0.1 M) with varying scan rate $\nu$ (see Figure legend) of the Mo(III)/Mo(II) ( <i>left</i> ) and of the Mo(III)/Mo(IV) redox couple ( <i>right</i> ). .....                                                                                                                                                                                                                                                                                                                                                                                                                                             | 52 |
| <b>Figure S59:</b> Randles-Ševčík plot of $[\text{Mo}(\text{}^t\text{Bu}\text{diket})_3]$ (1 mM) in $\text{TBAPF}_6/\text{THF}$ (0.1 M) of the Mo(III)/Mo(II) ( <i>left</i> ) and of the Mo(III)/Mo(IV) redox couple ( <i>right</i> ). .....                                                                                                                                                                                                                                                                                                                                                                                                                                                                             | 52 |

|                                                                                                                                                                                                                                                                                                                                                                                                                                                                                                                                                                                                                        |    |
|------------------------------------------------------------------------------------------------------------------------------------------------------------------------------------------------------------------------------------------------------------------------------------------------------------------------------------------------------------------------------------------------------------------------------------------------------------------------------------------------------------------------------------------------------------------------------------------------------------------------|----|
| <b>Figure S60:</b> CV (2 <sup>nd</sup> scan) of [Mo( <sup>t</sup> Budiket) <sub>3</sub> ] (1 mM) in TBAPF <sub>6</sub> /THF (0.1 M) under argon ( <i>black trace</i> ) and under CO <sub>2</sub> ( <i>light blue trace</i> ) at $\nu = 20 \text{ mV}\cdot\text{s}^{-1}$ ( <i>left</i> ) and $\nu = 100 \text{ mV}\cdot\text{s}^{-1}$ ( <i>right</i> ).....                                                                                                                                                                                                                                                             | 52 |
| <b>Figure S61:</b> <i>left:</i> CV of K <sub>2</sub> [Mo( <sup>t</sup> Budiket) <sub>2</sub> ( <sup>t</sup> Budiket·CO <sub>2</sub> )] (1 mM) in TBAPF <sub>6</sub> /THF (0.1 M) at a scan rate of $\nu = 100 \text{ mV}\cdot\text{s}^{-1}$ in anodic ( <i>top</i> ) and cathodic ( <i>bottom</i> ) scan direction. <i>right:</i> Comparison of CV of [Mo( <sup>t</sup> Budiket) <sub>3</sub> ] (1 mM) and K <sub>2</sub> [Mo( <sup>t</sup> Budiket) <sub>2</sub> ( <sup>t</sup> Budiket·CO <sub>2</sub> )] (1 mM) in TBAPF <sub>6</sub> /THF (0.1 M) at a scan rate of $\nu = 100 \text{ mV}\cdot\text{s}^{-1}$ ..... | 53 |
| <b>Figure S62:</b> Analysis after CPE (under Ar ( <i>black</i> ), under CO <sub>2</sub> ( <i>light blue</i> ) and under <sup>13</sup> CO <sub>2</sub> ( <i>dark blue</i> ) by <sup>13</sup> C NMR spectroscopy, after extraction with D <sub>2</sub> O. On the left, a zoom on 210 ppm < $\delta$ < 150 ppm is displayed.....                                                                                                                                                                                                                                                                                          | 54 |
| <b>Figure S63:</b> <sup>13</sup> C NMR spectrum after electrolysis in TBAPF <sub>6</sub> /MeCN (in MeCN- <i>d</i> <sub>3</sub> ).....                                                                                                                                                                                                                                                                                                                                                                                                                                                                                  | 55 |
| <b>Figure S64:</b> <sup>13</sup> C NMR spectrum of yellow precipitate formed after electrolysis in TEABF <sub>4</sub> /MeCN (in methanol- <i>d</i> <sub>4</sub> ).....                                                                                                                                                                                                                                                                                                                                                                                                                                                 | 55 |
| <b>Figure S65:</b> <sup>13</sup> C NMR spectrum of the working compartment solution after electrolysis in TEABF <sub>4</sub> /MeCN (taken to dryness, in methanol- <i>d</i> <sub>4</sub> ).....                                                                                                                                                                                                                                                                                                                                                                                                                        | 56 |
| <b>Figure S66:</b> Product analysis after CPE (with TEABF <sub>4</sub> as supporting electrolyte) by UV-Vis spectroscopy in methanol.....                                                                                                                                                                                                                                                                                                                                                                                                                                                                              | 56 |

# 1. Experimental

## 1.1 General Information

If not stated otherwise, all manipulations were conducted under air- and water free conditions under argon, either using standard glovebox (Vigor) or Schlenk-line techniques. All glassware was stored overnight at 120 °C and cooled under dynamic vacuum. Caps, valves, syringes *etc.* containing plastic and/or Teflon were dried overnight in a vacuum oven ( $T = 60\text{ °C}$ ,  $p = 10^{-3}\text{ mbar}$ ) prior to use. Dry solvents were obtained from a solvent purification system (Vigor), degassed by three consecutive freeze pump thaw cycles, and stored in a glove box, in J. Young-valve equipped flasks over activated molecular sieves (for additional purification details, see Table S1). Deuterated solvents were degassed by three consecutive freeze pump thaw cycles and purified according to Table S2. Commercially available chemicals were used as received or purified according to Table S3. **NMR** spectra were obtained on a 300 MHz Bruker Avance III, Bruker AVANCE DRX 500 MHz NMR, or Cryo-Probe Bruker Avance III 500 MHz spectrometer.  $^1\text{H}$  and  $^{13}\text{C}$  NMR spectra were referenced to residual protonated solvent signals. **Solution Magnetic Susceptibility** measurements were performed via  $^1\text{H}$  NMR spectroscopy using Evans' method with diamagnetic corrections.<sup>1, 2</sup> A capillary containing the same deuterated solvent was placed in the NMR tube prior to the measurement. The results were recorded in triplicate and the mean value is given with the corresponding standard deviation. **UV-Vis** spectra were collected inside an argon filled glove box with an Agilent Cary 60 instrument, which was connected by an optical fiber to a dip probe (path length  $d = 2\text{ mm}$ ). **FT-IR** spectra were recorded on a Nicolet iS5 spectrometer (Thermo Scientific), located inside an Ar-filled glove box. Minimal amounts of sample were mixed with KBr and pressed into a pellet. **X-Band EPR** spectrum was recorded on a Elexsys E500 EPR spectrometer (Bruker Biospin, Rheinstetten, Germany) equipped with an ESR-900 helium flow cryostat (Oxford Instruments, Oxfordshire, UK) and a Super-High-Q resonator (Bruker) at 9.5 GHz. The spectrum was processed and simulated using Matlab (The Mathworks, Natick, MA, USA) and EasySpin.<sup>3</sup> **Elemental analyses** were performed by the Mikrolabor ETH Zurich on a LECO TruSpec Micro spectrometer. Details on **electrochemistry** can be found in Section S8.

**Table S1:** List of used solvents, supplier and purification.

| Solvent                           | Supplier          | Purification                                                 |
|-----------------------------------|-------------------|--------------------------------------------------------------|
| Acetonitrile (MeCN)               | Sigma-Aldrich     | From SPS, stored over 3 Å MS.                                |
| Benzene                           | Sigma-Aldrich     | Distilled from K/benzophenone, stored over 4 Å MS.           |
| Diethyl ether (Et <sub>2</sub> O) | Sigma-Aldrich     | From SPS, distilled from K/benzophenone, stored over 4 Å MS. |
| Dimethoxyethane (DME)             | Sigma-Aldrich     | Distilled from K/benzophenone, stored over 4 Å MS.           |
| Hexamethyldisiloxane (HMDSO)      | Sigma-Aldrich     | Distilled from Na/benzophenone, stored over 4 Å MS.          |
| Methanol (MeOH)                   | Acros             | Stored over 3 Å MS.                                          |
| Ethanol (EtOH)                    | Sigma-Aldrich     | From SPS, stored over 3 Å MS                                 |
| <sup>n</sup> Pentane              | Sigma-Aldrich     | From SPS, stored over 4 Å MS.                                |
| Pyridine (Py)                     | Sigma-Aldrich     | Distilled from K/benzophenone, stored over 4 Å MS.           |
| Tetrahydrofuran (THF)             | Sigma-Aldrich     | From SPS, distilled from K/benzophenone, stored over 4 Å MS. |
| Toluene (PhMe)                    | Chemie Brunschwig | From SPS, stored over 4 Å MS.                                |

**Table S2:** List of used deuterated solvents, supplier and purification.

| Solvent                                | Supplier          | Purification                                          |
|----------------------------------------|-------------------|-------------------------------------------------------|
| MeCN- <i>d</i> <sub>3</sub>            | Sigma-Aldrich     | Stored over 3 Å MS (2 x 48 h)                         |
| Benzene- <i>d</i> <sub>6</sub>         | Sigma-Aldrich     | Distilled from K/benzophenone, stored over 4 Å MS.    |
| Dichloromethane- <i>d</i> <sub>2</sub> | Chemie Brunschwig | Distilled from CaH <sub>2</sub> , stored over 4 Å MS. |
| Chloroform- <i>d</i>                   | Sigma-Aldrich     | Distilled from CaH <sub>2</sub> , stored over 4 Å MS. |

|                                 |               |                                                    |
|---------------------------------|---------------|----------------------------------------------------|
| Methanol- <i>d</i> <sub>4</sub> | Sigma-Aldrich | Stored over 3 Å MS.                                |
| Pyridine- <i>d</i> <sub>5</sub> | Acros         | Distilled from K/benzophenone, stored over 4 Å MS. |
| THF- <i>d</i> <sub>8</sub>      | Sigma-Aldrich | Distilled from K/benzophenone, stored over 4 Å MS. |

**Table S3:** List of commercially available compounds.

| Reagent                                                                                                 | Supplier                | Purification                                                                                                |
|---------------------------------------------------------------------------------------------------------|-------------------------|-------------------------------------------------------------------------------------------------------------|
| Acetylacetone ( <sup>Me</sup> diketH)                                                                   | Sigma-Aldrich           |                                                                                                             |
| Ammonium chloride (NH <sub>4</sub> Cl)                                                                  | VWR                     |                                                                                                             |
| Ammonium molybdate ((NH <sub>4</sub> ) <sub>6</sub> Mo <sub>7</sub> O <sub>24</sub> ·4H <sub>2</sub> O) | Acros                   |                                                                                                             |
| Carbon disulfide ( <sup>12</sup> CS <sub>2</sub> )                                                      | Acros                   | Degassed by freeze pump thaw (3x) and stored over 4 Å MS.                                                   |
| <sup>13</sup> Carbon disulfide ( <sup>13</sup> CS <sub>2</sub> )                                        | Sigma-Aldrich           |                                                                                                             |
| 15-crown-5                                                                                              | Appollo Scientific Ltd. | Degassed and stored over molecular sieves (4 Å).                                                            |
| 18-crown-6                                                                                              | Appollo Scientific Ltd. | Sublimed under vacuum (10 <sup>-3</sup> mbar).                                                              |
| Dipivaloylmethane ( <sup>tBu</sup> diketH)                                                              | Fluorochem              | Degassed by freeze pump thaw (3x).                                                                          |
| Ferrocenium hexafluorophosphate (FcPF <sub>6</sub> )                                                    | Sigma Aldrich           |                                                                                                             |
| Graphite                                                                                                | Acros                   |                                                                                                             |
| Hydrochloric acid (HCl, 37 wt%)                                                                         | Sigma-Aldrich           |                                                                                                             |
| Mo(CO) <sub>6</sub>                                                                                     | Sigma Aldrich           | Sublimed under vacuum (10 <sup>-3</sup> mbar) at ambient temperature.                                       |
| Naphthalene                                                                                             | Sigma-Aldrich           | Sublimed under vacuum (10 <sup>-3</sup> mbar).                                                              |
| Potassium (K <sup>0</sup> )                                                                             | Acros                   | Washed with <sup>n</sup> pentane (2x) and dried under vacuum (10 <sup>-3</sup> mbar).                       |
| Potassium bromide (KBr)                                                                                 | Sigma-Aldrich           | Dried under high vacuum (10 <sup>-6</sup> mbar) at 290 °C.                                                  |
| Potassium hydride (KH)                                                                                  | Sigma Aldrich           | Washed with <sup>n</sup> pentane (2x) and dried under vacuum (10 <sup>-3</sup> mbar).                       |
| Silver hexafluorophosphate (AgPF <sub>6</sub> )                                                         | Sigma Aldrich           |                                                                                                             |
| Sodium Ingot 99.95%                                                                                     | Sigma Aldrich           |                                                                                                             |
| Sodium chloride (NaCl)                                                                                  | VWR                     |                                                                                                             |
| Sulfuric acid (H <sub>2</sub> SO <sub>4</sub> )                                                         | VWR                     |                                                                                                             |
| Tetrabutyl ammonium hexafluorophosphate (TBAPF <sub>6</sub> )                                           | Fluorochem              | Recrystallized from hot ethanol (2x) and dried at 80 °C for 48 h und high vacuum ( $p = 5 \mu\text{bar}$ ). |
| Tin shots (Sn)                                                                                          | Sigma Aldrich           |                                                                                                             |

**Table S4:** List of previously reported compounds prepared by synthesis.

| Compound                              | Purification | Reference                        |
|---------------------------------------|--------------|----------------------------------|
| Potassium graphite (KC <sub>8</sub> ) |              | Kaner <i>et al.</i> <sup>4</sup> |

## 2. Synthesis of Isolated Compounds

### 2.1 Homoleptic Mo(III) Complexes

#### 2.1.1 Synthesis of [Mo<sup>III</sup>(<sup>Me</sup>diket)<sub>3</sub>] (1)

Combined and modified procedures from Shibahara *et al.*<sup>5</sup> and Larson *et al.*<sup>6</sup> In a 500 mL Erlenmeyer flask, (NH<sub>4</sub>)<sub>6</sub>Mo<sub>7</sub>O<sub>24</sub>·4H<sub>2</sub>O (5.0 g, 30.1 mmol, 1.0 equiv.) was dissolved in concentrated HCl (100 mL). Tin metal shots (20 g, 168.5 mmol, 5.6 equiv.) were added and the solution was stirred at 100 °C in a boiling water bath. The solution turned from yellow green, to dark green and to a final color of red brown within 11 min. NH<sub>4</sub>Cl (5 g, 73.5 mmol, 3.1 equiv.) was added and the solution was heated for further 2 min. before cooling it in an ice bath for 1 min. The solution was filtered through a glass sintered frit and saturated with gaseous HCl (generated by dropwise addition of concentrated H<sub>2</sub>SO<sub>4</sub> to solid NaCl in a separate Schlenk flask) by bubbling for 1 h. The red solution was stored at 4 °C for two days. After filtration, washing with cold methanol and drying *in vacuo*, (NH<sub>4</sub>)<sub>3</sub>[MoCl<sub>6</sub>] was obtained as a salmon-orange colored crystalline solid in quantitative yields (10.9 g, 30.0 mmol).

<sup>Me</sup>diketH (32 mL, 312 mmol, 10.4 equiv.) was dissolved in degassed, deionized water (250 mL) at 50 °C. (NH<sub>4</sub>)<sub>3</sub>[MoCl<sub>6</sub>] (10.9 g, 30.0 mmol, 1.0 equiv.) was added as a solid and the reaction mixture was stirred for 1 h and 30 min at 50 °C. The obtained mixture was stored 4 °C overnight affording the precipitation of brown/dark purple crystals. The solvent was removed by filtration and the remaining solid was dried *in vacuo*, affording [Mo(acac)<sub>3</sub>] (3.25 g, 8.26 mmol, 27.4% based on (NH<sub>4</sub>)<sub>6</sub>[Mo<sub>7</sub>O<sub>24</sub>·4H<sub>2</sub>O]) as a dark purple crystalline solid. All spectroscopic data is in agreement with previous reports.<sup>6</sup> We have redetermined the magnetic susceptibility and also report here the <sup>1</sup>H NMR spectrum in benzene-*d*<sub>6</sub> and MeCN-*d*<sub>3</sub>:

$\mu_{\text{eff}} = 3.5(3) \mu_{\text{B}}$  (Evans-method). <sup>1</sup>H NMR (benzene-*d*<sub>6</sub>, 300 MHz)  $\delta$ [ppm] = 129.54 (s, 18H, CH<sub>3</sub>), 41.73 (s, 3H, CH). <sup>1</sup>H NMR (MeCN-*d*<sub>3</sub>, 300 MHz)  $\delta$ [ppm] = 126.60 (s, 18H, CH<sub>3</sub>), 41.33 (s, 3H, CH). This data is in accord with previous literature reports.<sup>7</sup>

#### 2.1.2 [Mo<sup>III</sup>(<sup>t</sup>Bu diket)<sub>3</sub>] (3)

In a 500 mL Schlenk flask, [Mo(CO)<sub>6</sub>] (11.41 g, 43.22 mmol, 1.0 equiv.) and <sup>t</sup>Bu diketH (54.1 mL, 259.3 mmol, 6.0 equiv.) were combined and suspended in Toluene (*ca.* 200 mL). The flask was connected to a reflux condenser and the reaction mixture was refluxed for 24 h. After cooling down to ambient temperature, the mixture was degassed by one freeze-pump-thaw cycle. Then, the reaction was again refluxed for 24 h. The last two steps were repeated three times. After cooling down to ambient temperature, all volatiles were removed under reduced pressure. Excess [Mo(CO)<sub>6</sub>] and <sup>t</sup>Bu diketH were distilled off under reduced pressure ( $T = 80$  °C,  $p = 0.005$  mbar). The remaining red solid material was recrystallized twice from hot acetonitrile (-35 °C). Filtration followed by drying *in vacuo* afforded the title compound as a dark red/brown, crystalline solid. Yield (1<sup>st</sup> crop): 16.44 g (25.46 mmol, 58.6%). Anal. Calcd for C<sub>33</sub>H<sub>57</sub>MoO<sub>6</sub>, C, 61.38; H, 8.90. Found: C, 61.37; H, 8.77.  $\mu_{\text{eff}} = 3.62(9) \text{ B.M.}$  (Evans-method). <sup>1</sup>H NMR (CD<sub>2</sub>Cl<sub>2</sub>, 500 MHz)  $\delta$ [ppm] = 44.19 (3H (CH), br), 6.78 (54H (CH<sub>3</sub>), br). <sup>1</sup>H NMR (C<sub>6</sub>D<sub>6</sub>, 500 MHz)  $\delta$ [ppm] = 46.11 (3H (CH), br), 7.03 (54H (CH<sub>3</sub>), br). UV-Vis (0.21 mM in THF):  $\lambda_{\text{max}}$  [nm] ( $[10^3 \cdot \text{M}^{-1} \cdot \text{cm}^{-1}]$ ) = 283 (31.2), 393 (7.3), 452 (4.5). Single crystals suitable for XRD analysis were grown by slowly cooling a saturated acetonitrile solution to -35 °C.

### 2.2 Homoleptic Mo(IV) Complexes

#### 2.2.1 [Mo<sup>IV</sup>(<sup>Me</sup>diket)<sub>3</sub>]PF<sub>6</sub> (2)

AgPF<sub>6</sub> (140 mg, 0.55 mmol, 1.1 equiv.) was added to a stirred solution of [Mo(<sup>Me</sup>diket)<sub>3</sub>] (197 mg, 0.50 mmol, 1.0 equiv.) in DME (*ca.* 5 mL). The reaction mixture was stirred at ambient temperature for one hour and then filtered by centrifugation. The obtained solid was extracted with acetonitrile and the resulting bright orange/red solution was concentrated to 2 mL. Slow diffusion of diethyl ether



into the concentrated acetonitrile solution afforded dark red crystals. The crystalline solid was filtered off and dried *in vacuo*. Yield (1<sup>st</sup> crop): 170 mg (0.32 mmol, 64%). Anal. Calcd for C<sub>15</sub>H<sub>21</sub>F<sub>6</sub>MoO<sub>6</sub>P, C, 33.47; H, 3.93. Found: C, 33.21; H, 3.76.  $\mu_{\text{eff}} = 2.68$  B.M. (Evans-method). <sup>1</sup>H NMR (MeCN-*d*<sub>3</sub>, 300 MHz)  $\delta$ [ppm] = 106.36 (s, 3H (<sup>diket</sup>CH)), 85.56 (s, 18H (CH<sub>3</sub>)). <sup>19</sup>F NMR (MeCN-*d*<sub>3</sub>, 282 MHz)  $\delta$ [ppm] = -72.85 (d, *J* = 706.4 Hz, (PF<sub>6</sub>)). <sup>31</sup>P NMR (MeCN-*d*<sub>3</sub>, 121 MHz)  $\delta$ [ppm] = -144.59 (hept, *J* = 702.9 Hz, PF<sub>6</sub><sup>-</sup>). UV-Vis (0.5 mM in MeCN):  $\lambda_{\text{max}}$  [nm] ( $[10^3 \cdot \text{M}^{-1} \cdot \text{cm}^{-1}]$ ) = 283 (8.6), 333 (5.8), 365 (5.6), 441 (3.0, sh). Single crystals suitable for XRD analysis were grown in the same way as described above for isolation.

### 2.2.2 [Mo<sup>IV</sup>(<sup>t</sup>Budiket)<sub>3</sub>]PF<sub>6</sub> (4)

AgPF<sub>6</sub> (56 mg, 0.22 mmol, 1.1 equiv.) was added to a stirred solution of [Mo(<sup>t</sup>Budiket)<sub>3</sub>] (130 mg, 0.20 mmol, 1.0 equiv.) in DME (ca. 8 mL). The reaction mixture was stirred at ambient temperature for one hour and then filtered by centrifugation. The filtrate was taken to dryness and the obtained red residue was washed with <sup>n</sup>pentane (2 x 3 mL) followed by Et<sub>2</sub>O (2 x 3 mL). Drying *in vacuo* afforded the title compound as a bright orange/red solid Yield: 129 mg (0.16 mmol, 82%). Anal. Calcd for C<sub>33</sub>H<sub>57</sub>F<sub>6</sub>MoO<sub>6</sub>P, C, 50.13; H, 7.27. Found: C, 50.11; H, 7.02.  $\mu_{\text{eff}} = 2.66(15)$  B.M. (Evans-method, MeCN-*d*<sub>3</sub>). <sup>1</sup>H NMR (MeCN-*d*<sub>3</sub>, 500 MHz)  $\delta$ [ppm] = 113.99 (s, 3H (<sup>diket</sup>CH)), 1.25 (s, 54H (CH<sub>3</sub>)). <sup>19</sup>F NMR (MeCN-*d*<sub>3</sub>, 471 MHz)  $\delta$ [ppm] = -72.94 (d, *J* = 706.6 Hz, (PF<sub>6</sub>)). <sup>31</sup>P NMR (MeCN-*d*<sub>3</sub>, 202 MHz)  $\delta$ [ppm] = -144.63 (hept, *J* = 706.5 Hz, PF<sub>6</sub><sup>-</sup>). UV-Vis (0.25 mM in THF):  $\lambda_{\text{max}}$  [nm] ( $[10^3 \cdot \text{M}^{-1} \cdot \text{cm}^{-1}]$ ) = 257 (16.0), 322 (7.8), 373 (7.6), 442 (4.9, sh). Single crystals suitable for XRD analysis were grown by slow diffusion of <sup>n</sup>pentane into a saturated THF-solution at ambient temperature.

## 2.3 Mo(II) Complexes

### 2.3.1 K[Mo<sup>II</sup>(<sup>t</sup>Budiket)<sub>3</sub>] (5)

In a 50 mL Schlenk flask, [Mo(<sup>t</sup>Budiket)<sub>3</sub>] (1.29 g, 2.0 mmol, 1.0 equiv.) was dissolved in Et<sub>2</sub>O and cooled to -35 °C. In 5 mL vial, KC<sub>8</sub> (296 mg, 2.2 mmol, 1.1 equiv.) was suspended in Et<sub>2</sub>O and cooled to -35 °C. The KC<sub>8</sub> suspension was added dropwise to the [Mo(<sup>t</sup>Budiket)<sub>3</sub>] solution. The resulting mixture was stirred for 30 min. while slowly warming to ambient temperature. After filtration through a short pad of celite, all volatiles were removed under reduced pressure affording the title compound as a dark green crystalline solid (1.23 g, 90%). *Note:* The here described procedure afforded the title compound in sufficient purity for further reactions. However, its very high solubility in both polar (e.g. acetonitrile) as well as apolar (e.g. <sup>n</sup>pentane) solvents prohibited the preparative purification by recrystallization, and hence these samples were always contaminated by small amounts of [Mo(<sup>t</sup>Budiket)<sub>3</sub>] starting material (visible by <sup>1</sup>H NMR). Nevertheless, we were able to grow single crystals amenable for XRD studies, either from acetonitrile or <sup>n</sup>pentane (both at -35 °C). Details on the corresponding solid-state structures can be found in Section S4. In order to obtain analytically pure material, we have found that treatment with crown ether (e.g. 18-crown-6) afforded the corresponding Mo(II) complex with more advantageous solubility properties (*vide infra*).

### 2.3.2 K(18-crown-6)<sub>0.5</sub>(thf)<sub>2</sub>[Mo<sup>II</sup>(<sup>t</sup>Budiket)<sub>3</sub>] (5·(18-c-6)<sub>1/2</sub>)

In a 20 mL scintillation vial, [Mo<sup>II</sup>(<sup>t</sup>Budiket)<sub>3</sub>] (200 mg, 0.31 mmol, 1.0 equiv.) was dissolved in THF (ca. 10 mL) and cooled to -35 °C. In a separate vial, KC<sub>8</sub> (50 mg, 0.36 mmol, 1.2 equiv.) was suspended in THF and cooled to -35 °C. The KC<sub>8</sub> suspension was added dropwise to the [Mo(<sup>t</sup>Budiket)<sub>3</sub>] solution. The resulting mixture was stirred for 30 minutes while slowly warming to ambient temperature. After removal of graphite by centrifugation, a solution of 18-crown-6 (50 mg, 0.19 mmol, 0.6 equiv.) in THF (ca. 2 mL) was added to the dark green filtrate and stirred at ambient temperature for 4 h. All volatiles were removed under reduced pressure and the obtained solid was washed with benzene (2 x 6 mL) followed by <sup>n</sup>pentane (3 x 6 mL). The remaining solid was dried *in vacuo*, affording the title compound as a dark black crystalline solid (180 mg, 0.19 mmol, 60%). Anal. Calcd for C<sub>47</sub>H<sub>85</sub>KMoO<sub>11</sub>, C, 58.73; H, 8.91. Found: C, 58.74; H, 8.92.  $\mu_{\text{eff}} = 2.6(2)$   $\mu_{\text{B}}$  (Evans-method). <sup>1</sup>H NMR (THF-*d*<sub>8</sub>, 300 MHz)  $\delta$ [ppm] = 8.36 (s, br), 5.42 (s, br), 4.13 (s, br), 3.66 (s, CH<sub>2</sub>, 18-crown-6) 3.62 (m, CH<sub>2</sub>, K(thf)), 1.77 (m, CH<sub>2</sub>, K(thf)). UV-Vis (0.23 mM in THF):  $\lambda_{\text{max}}$  [nm] ( $[10^3 \cdot \text{M}^{-1} \cdot \text{cm}^{-1}]$ ) = 283 (20.7), 380 (3.7), 431 (1.9, sh), 657 (2.6). Single crystals suitable

for XRD analysis were grown by slow diffusion of <sup>n</sup>pentane into a saturated solution of THF at ambient temperature.

### 2.3.3 K(15-crown-5)[Mo<sup>III</sup>(<sup>t</sup>Budiket)<sub>3</sub>] (5·(15-c-5))

In a 20 mL scintillation vial, [Mo<sup>III</sup>(<sup>t</sup>Budiket)<sub>3</sub>] (323 mg, 0.50 mmol, 1.00 equiv.) was dissolved in THF (ca. 8 mL) and cooled to -35 °C. In a separate vial, KC<sub>8</sub> (74 mg, 0.55 mmol, 1.1 equiv.) was suspended in THF (ca. 2 mL) and cooled to -35 °C. The KC<sub>8</sub> suspension was added dropwise to the [Mo(<sup>t</sup>Budiket)<sub>3</sub>] solution. The resulting mixture was stirred for 30 minutes while slowly warming to ambient temperature. After removal of graphite by centrifugation, a solution of 15-crown-5 (109 μL, 0.55 mmol, 1.1 equiv.) in THF (ca. 2 mL) was added to the dark green filtrate and stirred at ambient temperature for 4 h. All volatiles were removed under reduced pressure. The obtained solid was washed with <sup>n</sup>pentane (2 x 5 mL) and extracted with benzene (10 mL). Slow diffusion of <sup>n</sup>pentane (20 mL) resulted in the precipitation of dark black crystals. After filtration, the remaining solid was dried *in vacuo*, affording the title compound as a dark black crystalline solid (220 mg, 0.24 mmol, 48%, only the first crop was collected). Anal. Calcd for C<sub>89</sub>H<sub>157</sub>K<sub>2</sub>Mo<sub>2</sub>O<sub>22</sub>, C, 57.80; H, 8.56. Found: C, 57.97; H, 8.51.  $\mu_{\text{eff}} = 2.6(3) \mu_{\text{B}}$  (Evans-method). <sup>1</sup>H NMR (benzene-*d*<sub>6</sub>, 500 MHz)  $\delta$ [ppm] = 9.13 (s, br), 5.91 (s, br), 5.48 (s, br), 4.33 (s, br), 3.26 (s, CH<sub>2</sub>, 15-crown-5), 2.52 (s, br). UV-Vis (0.26 mM in THF):  $\lambda_{\text{max}}$  [nm] ( $[10^3 \cdot \text{M}^{-1} \cdot \text{cm}^{-1}]$ ) = 284 (17.8), 380 (3.0), 431 (1.6, sh), 644 (2.3). Single crystals suitable for XRD analysis were grown by slow diffusion of <sup>n</sup>pentane into a saturated solution of benzene at ambient temperature.

### 2.3.4 Attempted Preparation of Na[Mo(<sup>Me</sup>diket)<sub>3</sub>] by Reduction of [Mo(<sup>Me</sup>diket)<sub>3</sub>] with Sodium Naphthalenide

*This compound was only isolated as blue powder by precipitation. Due to inherently low solubility in most common organic solvents, no meaningful analytical data could be obtained. Despite multiple attempts, we also did not succeed in crystallizing this compound for structural characterization by single crystal XRD.*

In a 5 mL scintillation vial, a solution of naphthalene (164 mg, 1.27 mmol, 1.0 equiv.) in THF (4 mL) was added to elementary sodium (41 mg, 1.79 mmol, 1.4 equiv.) and stirred at ambient temperature for 1 h, forming a dark green solution of sodium naphthalenide. In a 20 mL Schlenk flask, [Mo(<sup>Me</sup>diket)<sub>3</sub>] (501 mg, 1.27 mmol, 1.0 equiv.) was dissolved in Et<sub>2</sub>O (6 mL). The freshly prepared sodium naphthalenide solution was added dropwise and the resulting mixture was stirred for 25 min. at ambient temperature. A dark blue solid precipitated, which was separated by filtration and washed with Toluene (3 x 5 mL) and Et<sub>2</sub>O (2 x 5 mL). After drying *in vacuo*, <sup>Me</sup>Mo(II) was obtained as a dark blue powder (234 mg). Anal. Calcd for C<sub>15</sub>H<sub>21</sub>MoNaO<sub>6</sub>, C, 43.28; H, 5.08. Found: C, 43.87; H, 5.00.

## 2.4 Synthesis of Bis(<sup>R</sup>diket) Complexes

### 2.4.1 [Mo<sup>II</sup>(<sup>t</sup>Budiket)<sub>2</sub>(py)<sub>2</sub>]

In a 25 mL scintillation vial, cold pyridine (3 mL, -35 °C) was added dropwise to solid K[Mo(<sup>t</sup>Budiket)<sub>3</sub>] (137 mg, 0.20 mmol, 1.0 equiv.). The resulting deep purple solution was stirred for one hour at ambient temperature. All volatiles were removed under reduced pressure and the obtained residue was extracted with <sup>n</sup>pentane. Removal of the solvent *in vacuo* afforded the desired product as a dark purple solid. Yield: 130 mg (0.20 mmol, 100%). Anal. Calcd for C<sub>32</sub>H<sub>48</sub>MoN<sub>2</sub>O<sub>4</sub>, C, 61.92; H, 7.80; N, 4.51. Found: C, 61.87; H, 8.12; N, 4.48.  $\mu_{\text{eff}} = 2.77(9) \mu_{\text{B}}$  (Evans-method, benzene-*d*<sub>6</sub>). <sup>1</sup>H NMR (benzene-*d*<sub>6</sub>, 500 MHz)  $\delta$ [ppm] = 28.88 (br, Py, *arom.* CH), 18.47 (br, 2H (<sup>diket</sup>CH)), 10.89 (br, Py, *arom.* CH), 0.88 (s, 36H (<sup>diket</sup>CH<sub>3</sub>)), -4.58 (br, Py, *arom.* CH). UV-Vis (0.25 mM in THF):  $\lambda_{\text{max}}$  [nm] ( $[10^3 \cdot \text{M}^{-1} \cdot \text{cm}^{-1}]$ ) = 228 (7.6), 254 (12.3), 327 (2.4), 385 (1.1), 541 (9.5), 580 (9.9), 907 (10.3 (br)).

Single crystals suitable for XRD analysis were grown by cooling a saturated solution in Et<sub>2</sub>O to -35 °C.

### 2.4.2 [Mo<sup>II</sup>(<sup>t</sup>Budiket)<sub>2</sub>(PEt<sub>3</sub>)<sub>2</sub>]

In a 20 mL scintillation vial, cold (-35 °C)  $\text{PEt}_3$  (ca. 1 mL) was added dropwise to  $\text{K}[\text{Mo}(\text{}^t\text{Bu diket})_3]$  (132 mg, 0.19 mmol, 1.0 equiv.). The resulting dark purple solution was stirred for three hours while warming to ambient temperature. All volatiles were removed under reduced pressure. The resulting dark purple residue was triturated with  $\text{Et}_2\text{O}$  (2 x 2 mL) and extracted with  $n$ -pentane (ca. 5 mL). All volatiles were removed under reduced pressure. The obtained crude was recrystallized from  $n$ -pentane at -35 °C. Anal. Calcd for  $\text{C}_{34}\text{H}_{68}\text{MoO}_4\text{P}_2$ , C, 58.44; H, 9.81. Found: C, 58.30; H, 9.88.  $\mu_{\text{eff}} = 2.83(11) \mu_{\text{B}}$  (Evans-method, benzene- $d_6$ ).  $^1\text{H}$  NMR (benzene- $d_6$ , 500 MHz)  $\delta$ [ppm] = 20.65 (br, 2H ( $\text{}^{\text{diket}}\text{CH}$ )), 6.48 (br, 18H ( $\text{PEt}_3$ ,  $\text{CH}_3$ )), 0.57 (s, 36H ( $\text{}^{\text{diket}}\text{CH}_3$ )), -15.96 (br, 12H ( $\text{PEt}_3$ ,  $\text{CH}_2$ )). UV-Vis (0.25 mM in THF):  $\lambda_{\text{max}}$  [nm] ( $[10^3 \cdot \text{M}^{-1} \cdot \text{cm}^{-1}]$ ) = 225 (10.3), 270 (15.5), 353 (8.4), 513 (5.7), 541 (9.5), 547 (8.8), 820 (12.5 (br)).

Single crystals suitable for XRD analysis were grown by cooling a saturated solution in  $\text{Et}_2\text{O}$  to -35 °C.

*The following two compounds were not isolated, but only identified by single crystal XRD:*

### 2.4.3 $[\text{Mo}^{\text{II}}(\text{}^{\text{Me}}\text{diket})_2(\text{py})_2]$

In a 25 mL scintillation vial, cold pyridine (3 mL, -35 °C) was added dropwise to solid  $\text{}^{\text{Me}}\text{Mo}(\text{II})$  (20 mg). The resulting deep purple solution was stirred for one hour at ambient temperature. After filtration, slow diffusion of  $\text{Et}_2\text{O}$  at ambient temperature led to the precipitation of dark purple crystals, which were analyzed by single crystal XRD.

### 2.4.4 $[\text{Mo}^{\text{II}}(\text{}^{\text{Me}}\text{diket})_2(\text{PEt}_3)_2]$

In a 20 mL scintillation vial, cold (-35 °C)  $\text{PEt}_3$  (ca. 1 mL) was added dropwise to solid  $\text{}^{\text{Me}}\text{Mo}(\text{II})$  (19 mg). The resulting deep purple solution was stirred for one hour at ambient temperature. All volatiles were removed by filtration and the obtained residue was extracted with  $n$ -pentane. Recrystallization from  $n$ -pentane at -35 °C led to the precipitation of deep purple crystals, which were analyzed by single crystal XRD.

## 2.5 Synthesis of $\text{K}[\text{}^t\text{Bu diket}]$

### 2.5.1 Synthesis of $\text{K}[\text{}^t\text{Bu diket}]$

In a 20 mL scintillation vial, potassium hydride (180 mg, 4.5 mmol, 0.9 equiv.) was added portion wise to a stirred solution of  $\text{}^t\text{Bu diketH}$  (920 mg, 5.0 mmol, 1.0 equiv.) in  $\text{Et}_2\text{O}/\text{THF}$  (1:1, ca. 20 mL) at -35 °C. The reaction mixture was stirred at for 30 minutes while slowly warming to ambient temperature. After filtration, all volatiles were removed under reduced pressure and the obtained residue was washed with  $n$ -pentane (2 x 5 mL). The final solid was dried *in vacuo* affording the title compound as a colorless powder.  $^1\text{H}$  NMR (THF- $d_8$ , 500 MHz)  $\delta$ [ppm] = 5.35 (s, 1H ( $\text{}^{\text{diket}}\text{CH}$ )), 1.06 (s, 18H ( $\text{CH}_3$ )).  $^{13}\text{C}$  NMR (THF- $d_8$ , 126 MHz)  $\delta$ [ppm] = 197.8 (s, C=O), 86.4 (s, CH), 41.9 (s,  $\text{C}_q$ ), 29.7 (s,  $\text{CH}_3$ ).

Single crystals suitable for XRD analysis were grown by cooling a saturated solution in a mixture of THF/ $n$ -pentane to -35 °C.

## 2.6 Reaction of $\text{K}[\text{Mo}(\text{}^t\text{Bu diket})_3]$ with $\text{CO}_2$

### 2.6.1 Synthesis of $\text{K}_2[\text{Mo}(\text{}^t\text{Bu diket})_2(\text{}^t\text{Bu diket}\cdot^{12}\text{CO}_2)]$ (6)

In a 100 mL, J-Young valve equipped round bottom flask,  $\text{Et}_2\text{O}$  (ca. 20 mL) was saturated with  $\text{CO}_2$ . A solution of  $\text{K}[\text{Mo}(\text{}^t\text{Bu diket})_3]$  (342 mg, 0.5 mmol) in  $\text{Et}_2\text{O}$  (ca. 5 mL) was added by syringe and the solution was stirred at ambient temperature for 30 min. An abrupt color change from dark green to dark red/brown was observed. All volatiles were removed under reduced pressure. The obtained solid was washed with  $n$ -pentane (3 x 10 mL). The  $n$ -pentane washings were taken to dryness, affording a dark red/brown solid, which was identified as  $[\text{Mo}(\text{}^t\text{Bu diket})_3]$  ( $m = 238$  mg, 0.37 mmol). The remaining solid was extracted with THF, resulting in a green solution. The THF extracts were taken to dryness ( $m_{\text{crude}} = 119$  mg) and recrystallized by slow evaporation of THF into HMDSO.

Filtration followed by drying *in vacuo* afforded the title compound as a green powder. Yield: 80.3 mg (0.11 mmol, 22%). Anal. Calcd for  $C_{34}H_{57}K_2MoO_8 \cdot (HMDSO)_{1/2}$ , C, 52.33; H, 7.83. Found: C, 52.63; H, 7.51.  $\mu_{\text{eff}} = 1.7(2) \mu_B$  (Evans-method).  $^1\text{H}$  NMR (THF- $d_8$ , 500 MHz)  $\delta$ [ppm] = 2.38 (br), 1.20 (br). UV-Vis (0.29 mM in THF,  $d = 2$  mm):  $\lambda_{\text{max}}$  [nm] ( $[10^3 \cdot M^{-1} \cdot \text{cm}^{-1}]$ ) = 233 (12.5), 284 (19.0), 372 (4.0), 682 (1.4, br).

Single crystals suitable for XRD analysis were grown by slow evaporation of a saturated solution (DME or THF) into HMDSO at ambient temperature.

### 2.6.2 Synthesis of $K_2[\text{Mo}(\text{}^t\text{Bu-diket})_2(\text{}^t\text{Bu-diket} \cdot ^{13}\text{CO}_2)]$ ( $^{13}\text{C}6$ )

The  $^{13}\text{C}$ -labelled complex was prepared with a slightly modified procedure:

In a 100 mL, J-Young valve equipped Schlenk flask,  $K[\text{Mo}(\text{}^t\text{Bu-diket})_3]$  (342 mg, 0.5 mmol) was dissolved in THF and degassed by three consecutive freeze-pump-thaw cycles.  $^{13}\text{CO}_2$  (1 atm, 2.7 mmol, 5.4 equiv.) was condensed into the frozen reaction mixture. The reaction mixture was slowly warmed to ambient temperature and stirred for 30 min. An instant color change from dark green to brown was observed. All volatiles were removed under reduced pressure. The obtained residue was washed with  $n$ -pentane (5 x 4 mL) and then extracted with THF. The green extraction solution was taken to dryness affording the title compound as a dark green solid (46 mg, 0.060 mmol, 12%).

The compound was used for reactivity studies and spectroscopic analyses without further purification.

### 2.6.3 Synthesis of $K_2[\text{Mo}(\text{}^t\text{Bu-diket})_2(\text{}^t\text{Bu-diket} \cdot \text{CO}_2)]$ using Excess $\text{KC}_8$

To support the proposed mechanistic pathway, and to prepare the title complex with improved yields, we have evaluated the reaction of  $K[\text{Mo}(\text{}^t\text{Bu-diket})_3]$  with  $\text{CO}_2$  in the presence of excess reducing agent ( $\text{KC}_8$ ). Here,  $K[\text{Mo}(\text{}^t\text{Bu-diket})_3]$  was generated *in-situ* by treatment of  $[\text{Mo}(\text{}^t\text{Bu-diket})_3]$  with  $\text{KC}_8$  (1.1 equiv.). An additional equivalent of  $\text{KC}_8$  was added in two steps, resulting in a significantly higher yield as compared to the original procedure with only 1 equivalent of reducing agent (Section 2.6.1).

*Procedure:* In a 100 mL, J-Young valve equipped round bottom flask,  $[\text{Mo}(\text{}^t\text{Bu-diket})_3]$  (323 mg, 0.5 mmol, 1.0 equiv.) was dissolved in  $\text{Et}_2\text{O}$  (ca. 10 mL) and saturated with  $\text{CO}_2$ . A suspension of  $\text{KC}_8$  (74 mg, 0.55 mmol, 1.1 equiv.) in  $\text{Et}_2\text{O}$  (ca. 3 mL) was added by syringe and the solution was stirred at ambient temperature for 10 min. Additional suspensions of  $\text{KC}_8$  (41 mg, 0.3 mmol, 0.6 equiv.) in  $\text{Et}_2\text{O}$  (ca. 3 mL), followed by  $\text{KC}_8$  (20 mg, 0.15 mmol, 0.3 equiv.) in  $\text{Et}_2\text{O}$  (ca. 3 mL), were added by syringe and the solution was stirred at ambient temperature for further 10 min. All volatiles were removed under reduced pressure. The obtained residue was washed with  $n$ -pentane (3 x 10 mL). The  $n$ -pentane washings were taken to dryness, affording a dark red/brown solid, which was identified as  $[\text{Mo}(\text{}^t\text{Bu-diket})_3]$  ( $m = 162$  mg, 0.25 mmol) ( $^1\text{H}$  NMR and UV-Vis spectroscopy). The remaining solid was extracted with THF, resulting in a green solution. The green extraction solution was taken to dryness affording the title compound as a dark green solid (184 mg, 0.24 mmol, 48%) ( $^1\text{H}$  NMR and UV-Vis spectroscopy).

## 2.7 Chemical Reduction with $\text{CS}_2$

### 2.7.1 Reduction with 5

In a 25 mL scintillation vial,  $\text{CS}_2$  (237  $\mu\text{L}$ , 4 mmol, 20 equiv.) was dissolved in THF (7 mL). A solution of  $K[\text{Mo}(\text{}^t\text{Bu-diket})_3]$  (137 mg, 0.20 mmol, 1.0 equiv.) and 18-crown-6 (58 mg, 0.22 mmol, 1.1 equiv.), dissolved in THF (3 mL), was added and the reaction mixture was stirred at ambient temperature for one hour. An instant color change from dark green to brown/red occurred and a dark solid precipitated. All volatiles were removed under reduced pressure and the obtained dark residue was extracted with  $n$ -pentane. The removal of the solvent *in vacuo* afforded  $[\text{Mo}(\text{}^t\text{Bu-diket})_3]$  in quantitative yields (129 mg, 0.2 mmol). The remaining solid was recrystallized by slow diffusion of  $n$ -pentane into a saturated solution of the crude in pyridine, affording  $[\text{K}(18\text{-crown-6})]_2[\text{C}_2\text{S}_4]$  as a dark green crystalline solid (70 mg, 0.092 mmol, 92%).  $^1\text{H}$  NMR (Py- $d_5$ , 500 MHz)  $\delta$ [ppm] = 3.60 ( $\text{CH}_2$ ).  $^{13}\text{C}$  NMR

(Py- $d_5$ , 125 MHz)  $\delta$ [ppm] = 269.7 ( $CS_2$ ), 71.1 ( $CH_2$ ). UV-Vis (0.24 mM in Py,  $d = 2$  mm):  $\lambda_{max}$  [nm] ( $[10^3 \cdot M^{-1} \cdot cm^{-1}]$ ) = 302 (10.7), 391 (19.5) 391 (7.0, sh). UV-Vis (0.15 mM in MeCN,  $d = 2$  mm):  $\lambda_{max}$  [nm] ( $[10^3 \cdot M^{-1} \cdot cm^{-1}]$ ) = 294 (11.9), 352 (17.0), 392 (5.5, sh).

## 2.7.2 Reduction with $K^0$

Potassium metal (19.5 mg, 0.5 mmol, 1.0 equiv.) and THF (5 mL) were placed into a 25 mL scintillation vial. A solution of 18-crown-6 (132 mg, 0.5 mmol, 1.0 equiv.) and  $CS_2$  (600  $\mu$ L, 10 mmol, 20.0 equiv.) in THF (5 mL) was added and the reaction was stirred at ambient temperature for 48 h. The reaction mixture was filtered by centrifugation and the remaining solid was extracted with pyridine. The crude product was obtained after removal of all volatiles under reduced pressure as a dark green solid (158 mg). Analysis by  $^{13}C$  NMR and UV-Vis spectroscopy was used to identify and quantify the crude product.  $^{13}C$  NMR (Py- $d_5$ , 125 MHz)  $\delta$ [ppm] = 271.7 ( $CS_3$ ,  $CS_3^{2-}$ ), 269.7 ( $CS_2$ ,  $C_2S_4^{2-}$ ), 70.8 ( $CH_2$ , 18-crown-6)) (Figure S1). UV-Vis (0.32 mM in Py,  $d = 2$  mm): normalized absorption at  $\lambda = 353$  nm [ $mg^{-1} \cdot mL$ ] = 3.80 (Figure S2). Final calculated yield of  $[K(18\text{-crown-6})]_2[C_2S_4]$ : 0.15 mmol, 60%.

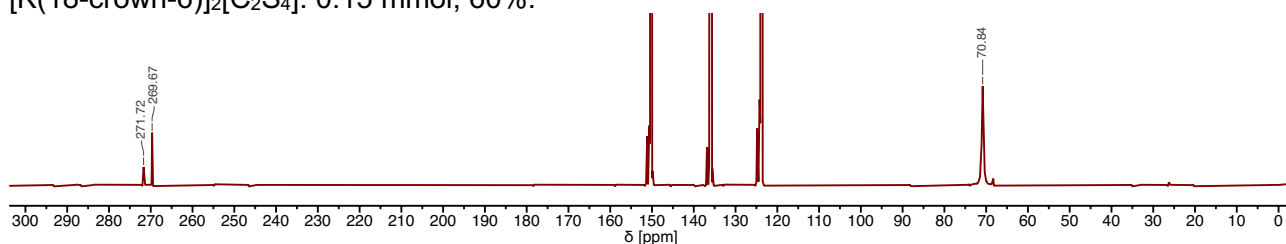

**Figure S1:**  $^{13}C$  NMR spectrum in pyridine- $d_5$  of the crude reaction mixture (pyridine-extraction) after reduction with  $K^0$ .

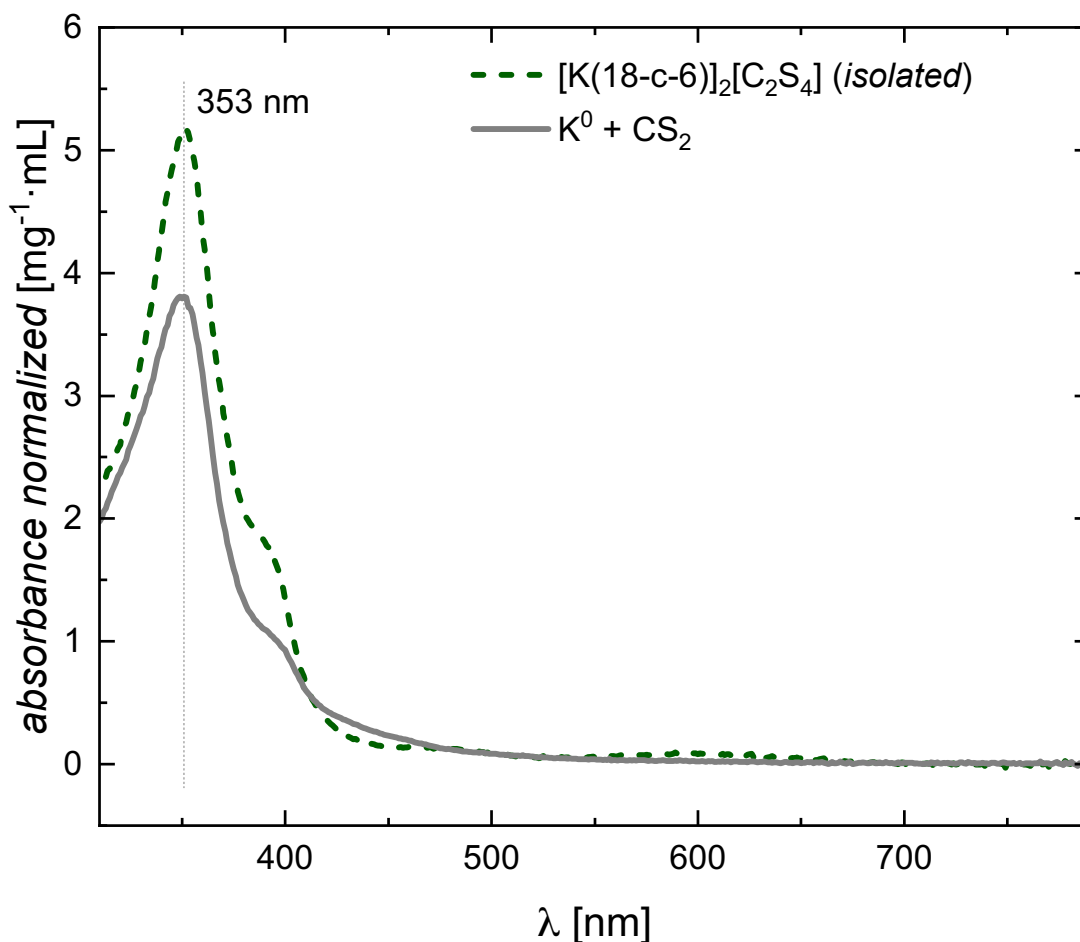

**Figure S2:** UV-Vis spectrum (normalized by concentration [ $mg \cdot mL^{-1}$ ]) in pyridine of the crude reaction mixture after stoichiometric reduction with  $K^0$  (solid grey line). The spectrum of isolated  $[K(18\text{-crown-6})]_2[C_2S_4]$  is displayed for comparison (dashed line).

### 3. Additional Reactivity Studies

#### 3.1 Reactivity of Chemically Reduced $[\text{Mo}^{\text{Me}}\text{diket}]_3$ with $\text{CO}_2$

The dark green solid, obtained by reduction of  $\text{MeMo(III)}$  with  $\text{KC}_8$  displayed limited solubility in polar solvents such as THF. Exposure of such THF solutions to excess  $\text{CO}_2$  led to an abrupt color change from deep green to brown red, accompanied by the precipitation of a grey/green solid. The filtrate was identified by  $^1\text{H}$  NMR to be  $\text{MeMo(III)}$ , whose formation was already indicated by the CV measurement under  $\text{CO}_2$ . However, the  $^1\text{H}$  NMR spectrum (in  $\text{MeCN-}d_3$ ) of the precipitated solid displayed a substantial change: while the peak of the central methine proton ( $\text{CH}$ ) remained unchanged ( $\delta = 41.3$  ppm), the signal assigned to the six protons of the methyl groups ( $2 \times \text{CH}_3$ ) of the  $\text{Me}$ diket ligand at  $\delta = 126.6$  ppm split into three distinct features, located at a slightly higher chemical shift ( $\delta = 131.3, 129.7$  &  $127.9$  ppm, see Section S3.3, Figure S7, *blue* trace). We thus suggest that the methyl groups are the reactive site of the reduced metal complex with  $\text{CO}_2$ . However, the same  $^1\text{H}$  NMR pattern evolved, when  $\text{MeMo(III)}$  was stirred in  $\text{MeOH-}d_4$  for 24 h (see Section S3.3, Figure S7, *orange* trace). Hence, we concluded that the characteristic signals at  $\delta(^1\text{H}) > 125$  ppm are not related to any reactivity with  $\text{CO}_2$ , but originate from deuteration of the ligand. Very likely,  $\text{KC}_8$  acts as a base and promotes deuteration of the terminal methyl groups. Nevertheless, these experiments showed, that  $\text{CO}_2$  reacts with the reduced ( $\text{Mo(II)}$ ) species and promotes its reoxidation to  $\text{Mo(III)}$ . To elucidate the  $\text{CO}_2$ -based product of this redox reaction, we further focused on  $^{13}\text{C}$  NMR spectroscopy. Unfortunately, all THF- $d_8$  solutions containing paramagnetic Mo species are  $^{13}\text{C}$  NMR silent. However, extraction of the conceivably carboxylated mixture with methanol- $d_4$  allowed for  $^{13}\text{C}$  NMR analysis: two signals at  $\delta(^{13}\text{C}) = 176.0$  &  $161.4$  ppm appeared, both of which remarkably increased in intensity when same experiments were conducted with  $^{13}\text{C}$  labelled  $^{13}\text{CO}_2$  (see Figure S32). Combined with investigations performed on  $^t\text{BuMo(II)} + \text{CO}_2$ , we tentatively assign these two major signals to the carboxylated ligand ( $\text{K}[\text{Me}^t\text{diket-}^{13}\text{CO}_2]$ ) and potassium methyl carbonate ( $\text{K}[\text{O}_2^{13}\text{COCD}_3]$ ), respectively (see Section S3.3 for details).

#### 3.2 Reactivity of $\text{K}[\text{Mo}^t\text{Bu}^t\text{diket}]_3$ with $\text{CS}_2$

##### 3.2.1 In the Absence of 18-Crown-6

In a 5 mL scintillation vial, 0.2 M stock solution  $^{13}\text{CS}_2$  ( $110 \mu\text{L}$ ,  $0.022$  mmol,  $1.1$  equiv.) in THF- $d_8$  was diluted with THF- $d_8$  ( $0.4$  mL). A solution of  $\text{K}[\text{Mo}^t\text{Bu}^t\text{diket}]_3$  ( $13.7$  mg,  $0.020$  mmol,  $1.0$  equiv.) in THF- $d_8$  ( $0.4$  mL) was added dropwise and the reaction was stirred for 20 min at ambient temperature. The color changed instantly from dark green to brown/red and a solid precipitated. The reaction mixture was filtered by centrifugation. The filtrate was directly analyzed by  $^1\text{H}$  NMR spectroscopy, revealing the clean formation of  $[\text{Mo}^t\text{Bu}^t\text{diket}]_3$  ( $\delta_{\text{H}} = 47.42$  ppm ( $\text{CH}$ ),  $7.02$  ppm ( $\text{CH}_3$ )) (Figure S3). The solid was dissolved in methanol- $d_4$  and analyzed by  $^{13}\text{C}$  NMR spectroscopy. Potassium tetrathiooxalate ( $\text{K}_2[^{13}\text{C}_2\text{S}_4]$ ,  $\delta_{\text{C}} = 269.2$  ppm)<sup>8</sup>, potassium methyl xanthate- $d_3$  ( $\text{K}[^{13}\text{CS}_2\text{OCD}_3]$ ,  $\delta_{\text{C}} = 234.4$  ppm)<sup>9</sup> and potassium 2-thioxo-1,3-dithiol-4,5-dithiolate ( $\text{K}_2[^{13}\text{C}_3\text{S}_5]$ ,  $\delta_{\text{C}} = 210.5$  ppm ( $\text{C}=\text{S}$ ),  $142.5$  ppm ( $\text{CS}_2$ ))<sup>10</sup> were identified as the main  $^{13}\text{CS}_2$ -derived products (Figure S4). Note that the methyl carbon of potassium methyl xanthate- $d_3$  is not visible in the  $^{13}\text{C}$  NMR spectrum because it is a non-labelled carbon and fully deuterated at the same time.

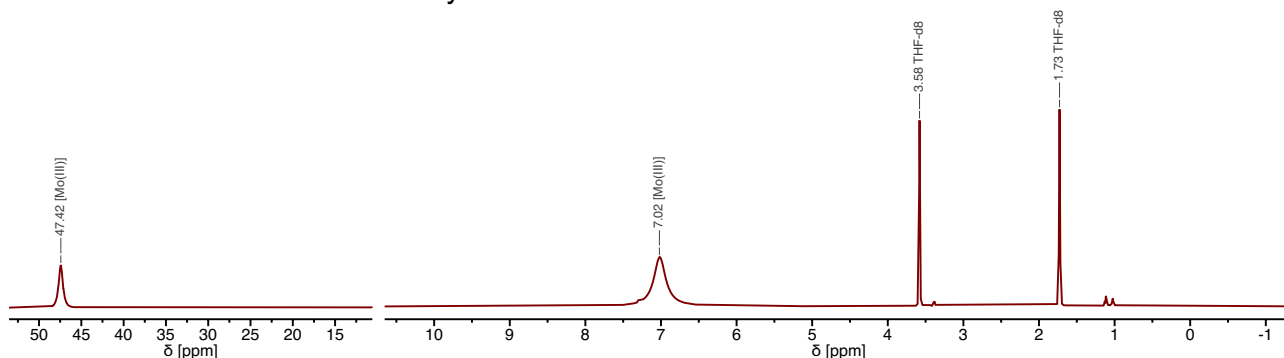

Figure S3:  $^1\text{H}$  NMR spectrum of the THF- $d_8$  filtrate.

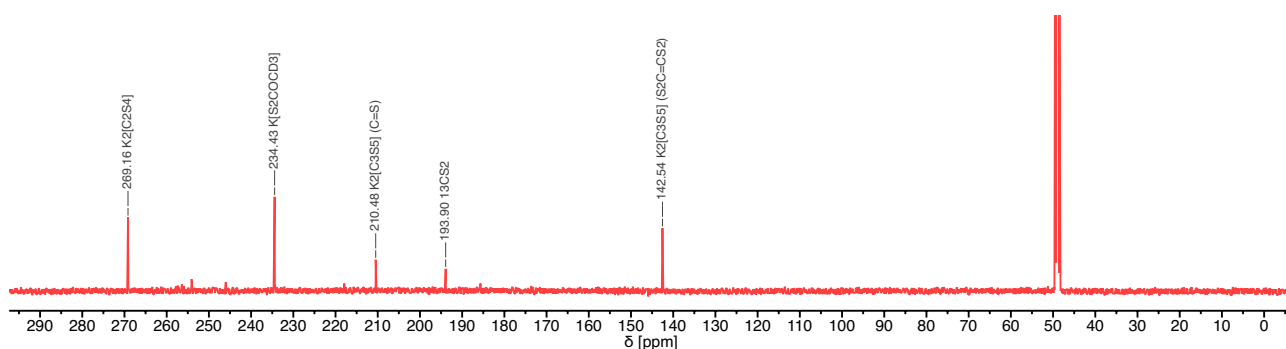

**Figure S4:**  $^{13}\text{C}$  NMR spectrum of the THF- $d_8$  solid, dissolved in methanol- $d_4$ .

### 3.2.2 In the Presence of 18-Crown-6

In a 5 mL scintillation vial, 0.2 M stock solution  $^{13}\text{CS}_2$  (110  $\mu\text{L}$ , 0.022 mmol, 1.1 equiv.) in THF- $d_8$  was diluted with THF- $d_8$  (0.4 mL). A solution of  $\text{K}[\text{Mo}(\text{}^t\text{Bu} \text{diket})_3]$  (13.7 mg, 0.020 mmol, 1.0 equiv.) and 18-crown-6 (5.3 mg, 0.020 mmol, 1.0 equiv.) in THF- $d_8$  (0.4 mL) was added dropwise and the reaction was stirred for 20 min at ambient temperature. The color changed instantly from dark green to brown/red and a solid precipitated. The reaction mixture was filtered by centrifugation. Both, the filtrate and the solid (dissolved in methanol- $d_4$ ) were analyzed by NMR spectroscopy.

Clean formation of  $[\text{Mo}(\text{}^t\text{Bu} \text{diket})_3]$  is visible from the  $^1\text{H}$  NMR spectrum of the filtrate (Figure S5).

Besides the new peak assigned to 18-crown-6 in the  $^{13}\text{C}$  NMR spectrum of the solid (in methanol- $d_4$ ), the same set of signals is present as observed for the reaction in absence of 18-crown-6 (Figure S6). However, the product distribution is markedly different with a high selectivity for potassium tetrathiooxalate ( $[\text{K}(18\text{-crown-6})]_2[^{13}\text{C}_2\text{S}_4]$ ,  $\delta_{\text{C}} = 269.9$  ppm). Note the small change in chemical shift which is due to the presence of 18-crown-6.

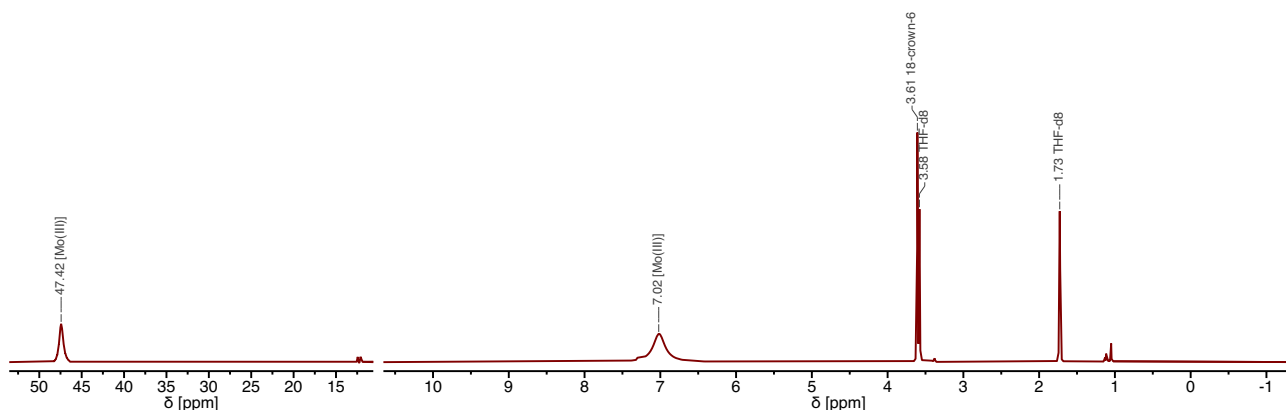

**Figure S5:**  $^1\text{H}$  NMR spectrum of the THF- $d_8$  filtrate.

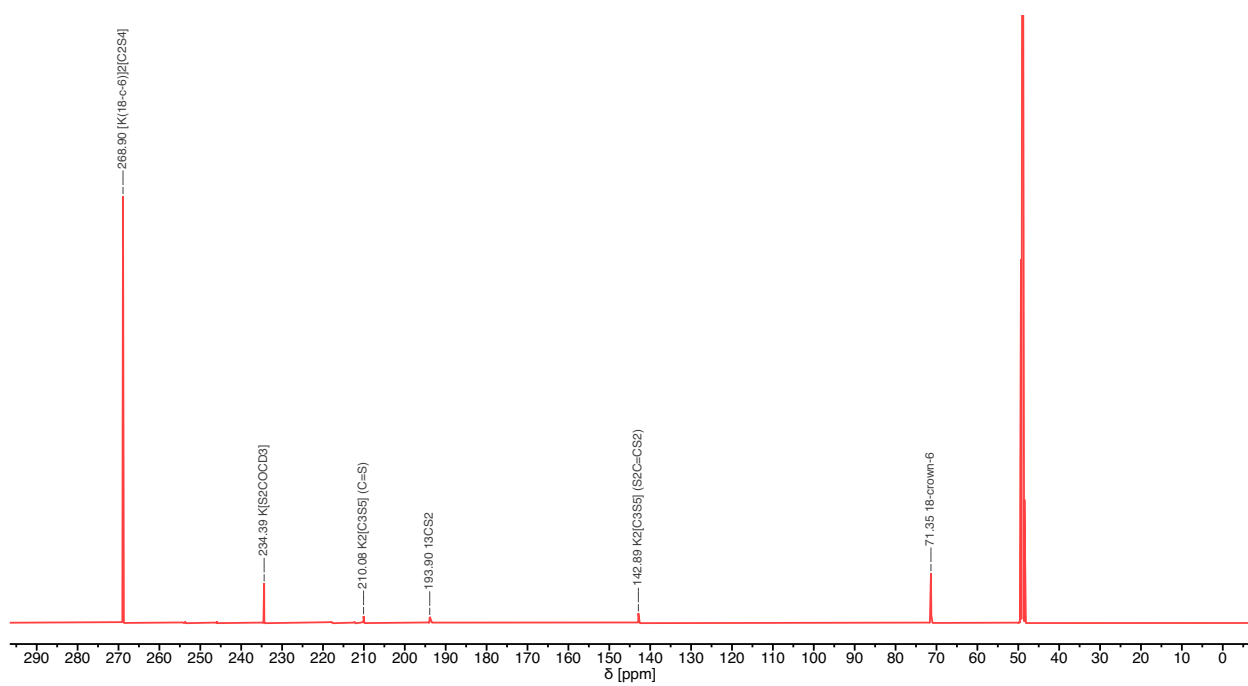

**Figure S6:**  $^{13}\text{C}$  NMR spectrum of the THF- $d_8$  solid, dissolved in methanol- $d_4$ .



### 3.3 Deuteration of [Mo(<sup>Me</sup>diket)<sub>3</sub>]

The terminal alpha-protons of the <sup>Me</sup>diket ligand of **1** were found to be easily exchanged both under basic and acidic conditions, as visible by a decreased integral (as well as minor change in chemical shift) of the corresponding terminal alpha-protons in <sup>1</sup>H NMR spectroscopy. Considerable deuteration of the ligand was observed when **1** was treated with [TBA]<sub>2</sub>[oxalate] (in MeCN-*d*<sub>3</sub>) or when it was stirred in methanol-*d*<sub>4</sub> for 24 h (Figure S7). Strikingly, the same effect of ligand deuteration was evident in reactivity tests of chemically reduced **1** (e.g. with KC<sub>8</sub>) with CO<sub>2</sub> (see Section S3.1).

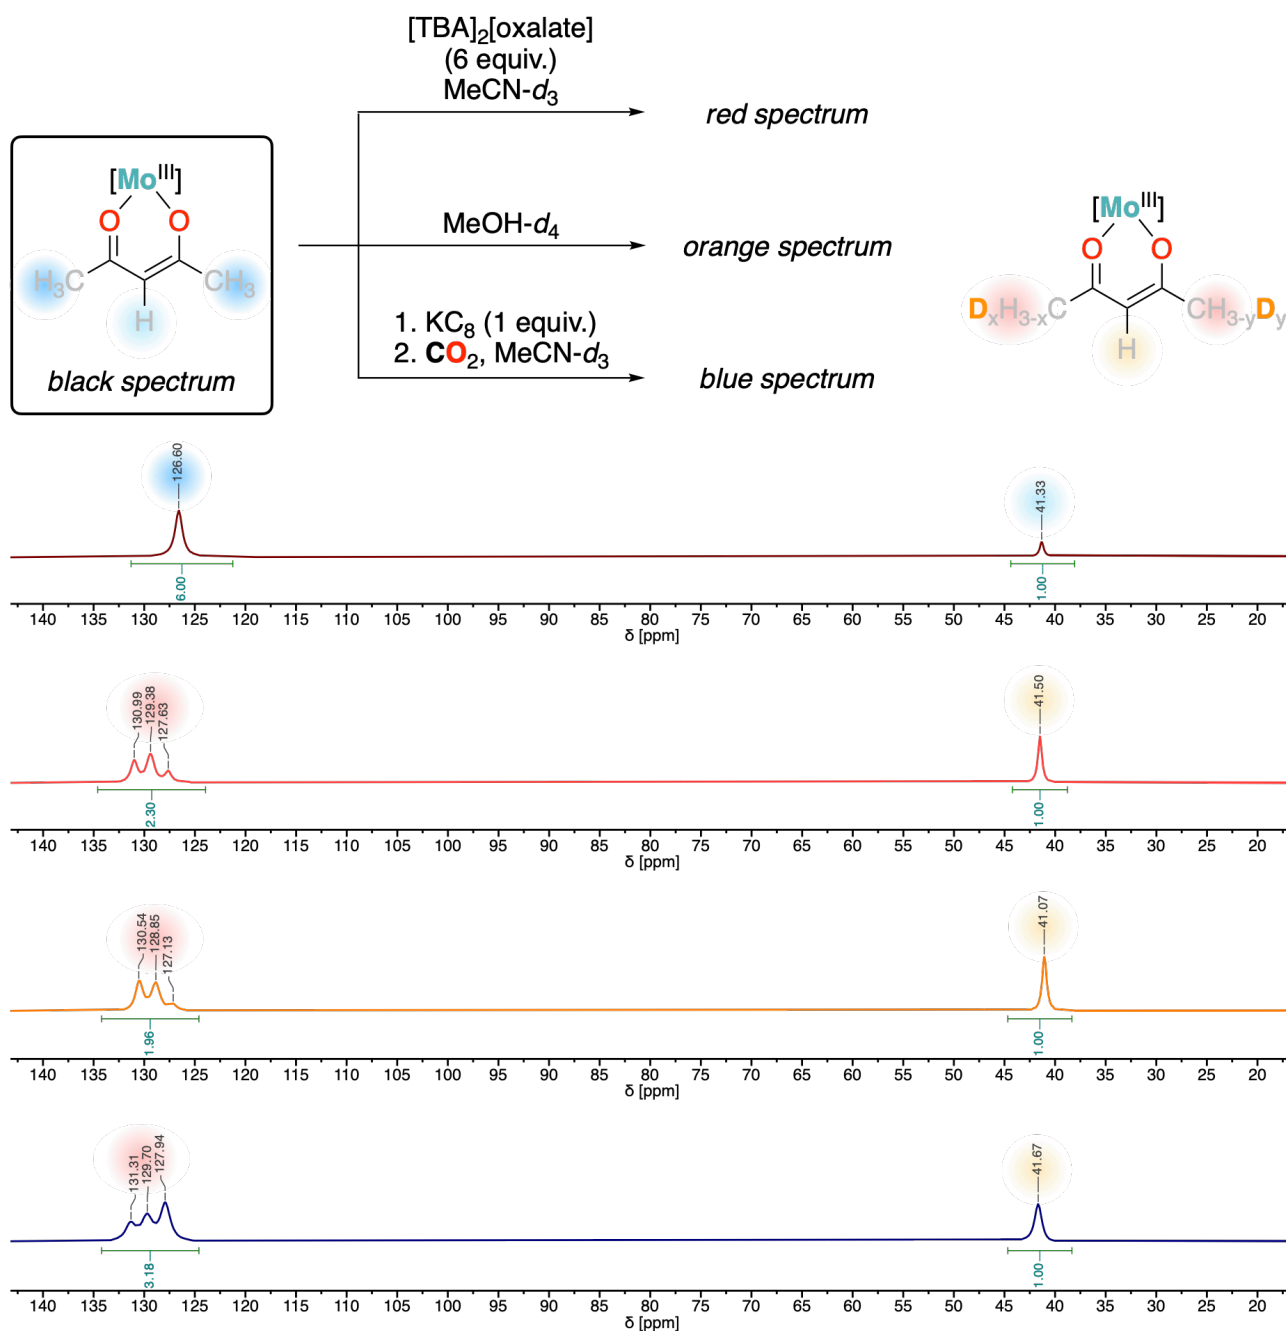

**Figure S7:** Me diket ligand deuteration monitored by <sup>1</sup>H NMR spectroscopy: **1** in MeCN-*d*<sub>3</sub> (*black*, top), **1** + [TBA]<sub>2</sub>[oxalate] in MeCN-*d*<sub>3</sub> stirred for 24 h (*red*), **1** in methanol-*d*<sub>4</sub>, stirred for 24 h (*orange*) and **1** reduced with KC<sub>8</sub> under CO<sub>2</sub> in MeCN-*d*<sub>3</sub> (*blue*).

### 3.4 Reactivity Studies of **6**

In a series of reactivity studies, we have aimed at isolating the free carboxylated ligand [<sup>t</sup>Bu<sub>2</sub>diket·CO<sub>2</sub>]<sup>-</sup>. This turned out to be challenging, due to the known lability of the carboxyl group which is located in β-position to two carbonyls and thus prone to decarboxylation.<sup>11</sup> On the other hand, most reactivity tests of **6** resulted in the formation of **3** (as gauged by <sup>1</sup>H NMR), suggesting the feasibility of a closed synthetic cycle for CO<sub>2</sub> incorporation into a β-diketone ligand. Overall, we found that an oxidizing agent is required to induce de-coordination of the carboxylated ligand. For example, addition of <sup>t</sup>Bu<sub>2</sub>diketH to <sup>13</sup>C**6**, cleanly afforded **3**, which can be isolated by extraction with <sup>n</sup>pentane (Scheme S1, *left arrow*). Compared to the completely <sup>13</sup>C NMR-silent <sup>13</sup>C**6**, two signals of comparable intensity evolved at δ(<sup>13</sup>C) = 126 ppm and δ(<sup>13</sup>C) = 171.1 ppm over a period of 8 h (see Figure S27). While the first signal matches to free <sup>13</sup>CO<sub>2</sub>, the second one is tentatively assigned to the C<sub>3</sub>-carboxylated <sup>t</sup>Bu<sub>2</sub>diket ligand. As a control experiment, exposure of independently prepared K[<sup>t</sup>Bu<sub>2</sub>diket] to <sup>13</sup>CO<sub>2</sub> generates a signal in the <sup>13</sup>C NMR spectrum at the very same chemical shift (δ(<sup>13</sup>C) = 171.1 ppm, see Scheme S1 (*bottom left*) and Figure S28).

However, when dissolving <sup>13</sup>C**6** in methanol-*d*<sub>4</sub>, a single peak at δ = 161.5 ppm evolved (see Scheme S1, *right arrow* and Figure S29), reminiscent of the experimental outcome with the <sup>Me</sup>diket-supported Mo-complex. This chemical shift is in very good agreement with literature, suggesting the formation of potassium methyl carbonate (K[OCO<sub>2</sub>Me]).<sup>12</sup> The product identity was further evidenced by single crystal XRD: Crystals of K[OCO<sub>2</sub>Me] were grown by slow by slow diffusion of diethyl ether into a saturated solution in methanol. In addition, no <sup>13</sup>CO<sub>2</sub> evolution was observed, supporting the hypothesis above. While considerable amounts of **3** were observed by <sup>1</sup>H NMR, a new set of broad signals at δ = 42.27, 7.04, and 6.76 ppm appeared in the <sup>1</sup>H NMR spectrum (Figure S30). After two days, dark red crystals precipitated out of the methanol solution, which were identified as [Mo<sup>III</sup>(<sup>t</sup>Bu<sub>2</sub>diket)<sub>2</sub>(μ-OMe)]<sub>2</sub> by single-crystal XRD. Stoichiometric amounts of H<sub>2</sub> were detected by GC-TCD analysis of the headspace. We therefore propose that methanol acts in two ways; first it displaces the carboxylate group attached to [<sup>t</sup>Bu<sub>2</sub>diket·CO<sub>2</sub>]<sup>-</sup> under the formation of potassium methyl carbonate, while it also serves as an oxidizing agent generating H<sub>2</sub> and KOMe, which explains the formation of **3**. A slow reaction between **3** and KOMe further lead to the dimeric complex [Mo<sup>III</sup>(<sup>t</sup>Bu<sub>2</sub>diket)<sub>2</sub>(μ-OMe)]<sub>2</sub> and K[<sup>t</sup>Bu<sub>2</sub>diket]. Independent reactivity tests of **3** + KOMe led to identical <sup>1</sup>H NMR traces.

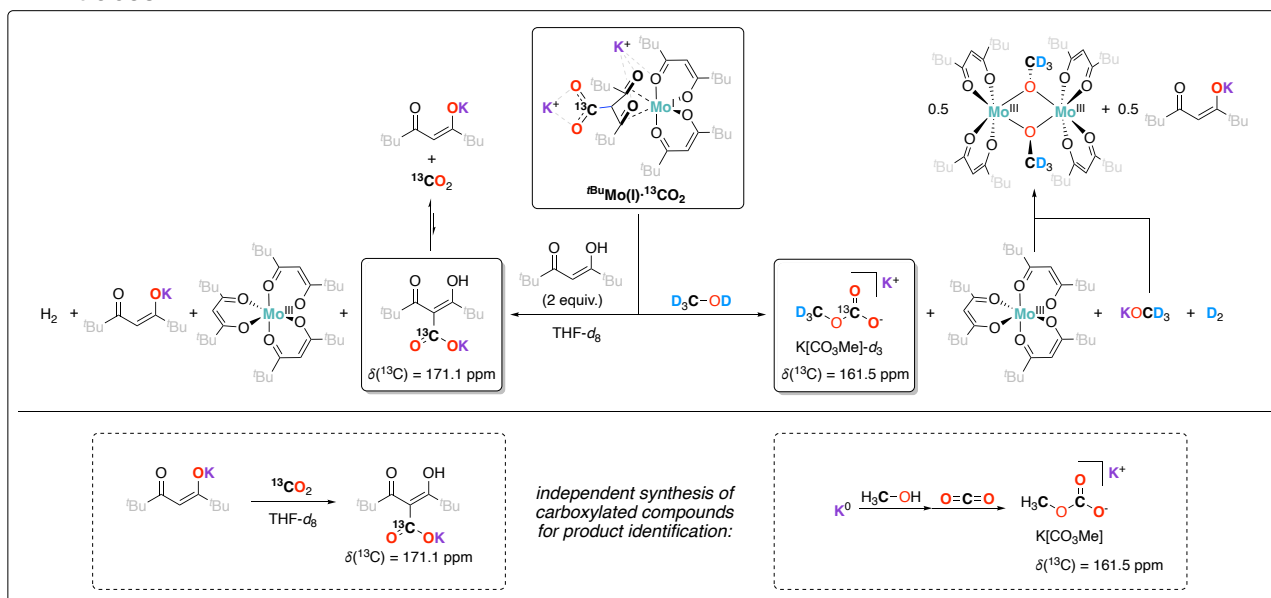

**Scheme S1:** Attempts to isolate and valorize the carboxylated ligand [<sup>t</sup>Bu<sub>2</sub>diket·CO<sub>2</sub>]<sup>-</sup> of **6**.

### 3.5 Reactivity of $K[t^{\text{Bu}}\text{diket}]$ with $\text{CS}_2$

Analogously to the reactivity with  $\text{CO}_2$ , thiocarboxylation of  $K[t^{\text{Bu}}\text{diket}]$  upon addition of excess  $^{13}\text{CS}_2$  was observed by  $^{13}\text{C}$  NMR spectroscopy ( $K[t^{\text{Bu}}\text{diket} \cdot ^{13}\text{CS}_2]$ ,  $\delta_{\text{C}} = 249.3$  ppm, Figure S8). However, it is noteworthy that such a signal has never been observed in any reaction of reduced molybdenum complex with  $\text{CS}_2$ , likely due to its lower stability and shorter lifetime.

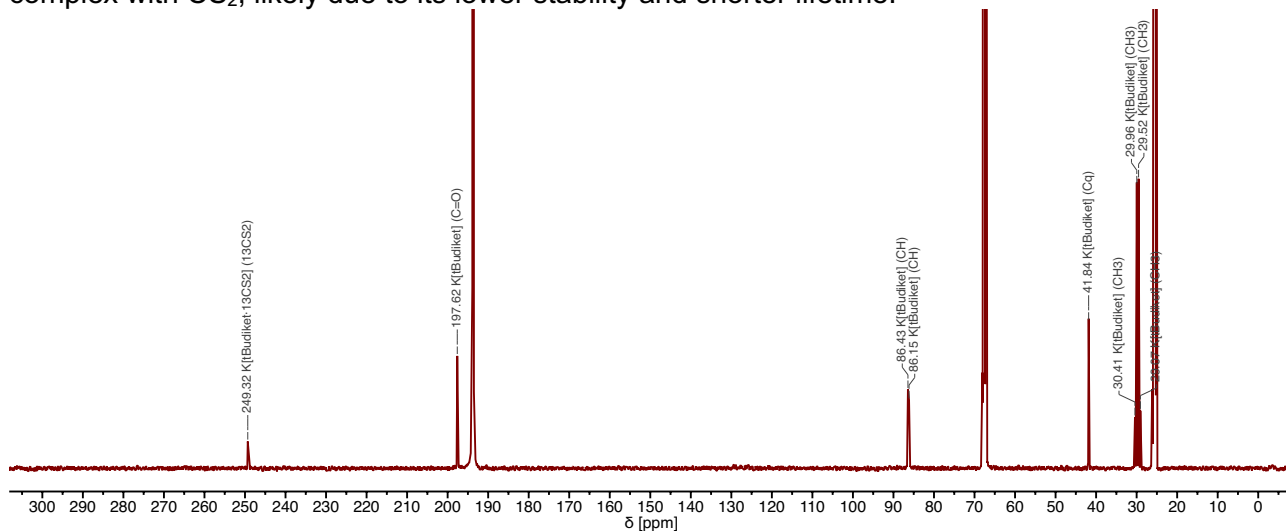

**Figure S8:**  $^{13}\text{C}$  NMR spectrum in  $\text{THF-}d_8$  of  $K[t^{\text{Bu}}\text{diket}] + ^{13}\text{CS}_2$  (10 equiv.).

Of important note here, is that addition of methanol- $d_4$  led to the disappearance of the signal at  $\delta_{\text{C}} = 249.3$  ppm, and the emergence of a strong resonance at  $\delta_{\text{C}} = 233.8$  ppm, assigned to potassium methylxanthate- $d_3$  ( $K[^{13}\text{CS}_2\text{OCD}_3]$ , Figure S9).

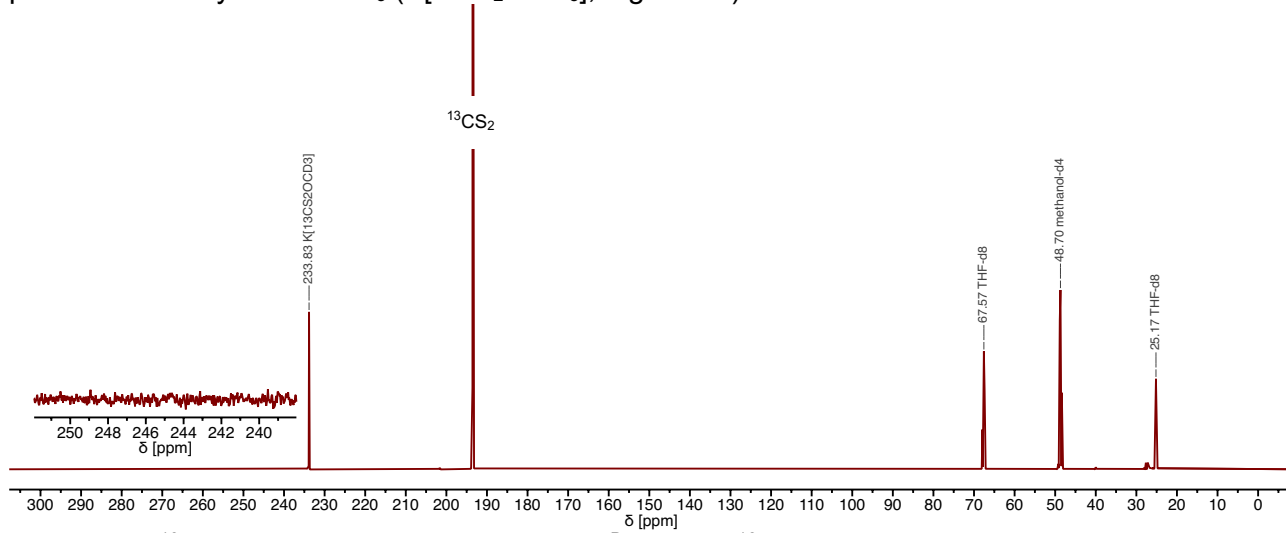

**Figure S9:**  $^{13}\text{C}$  NMR spectrum in  $\text{THF-}d_8$  of  $K[t^{\text{Bu}}\text{diket}] + ^{13}\text{CS}_2$  (10 equiv.) after addition of methanol- $d_4$ .

#### 3.5.1 Procedure

In a 5 mL scintillation vial,  $K[t^{\text{Bu}}\text{diket}]$  (6.0 mg, 0.02 mmol, 1.0 equiv.) was dissolved in  $\text{THF-}d_8$  (600  $\mu\text{L}$ ).  $^{13}\text{CS}_2$  (12  $\mu\text{L}$ , 0.20 mmol, 10 equiv.) was added and the resulting colorless reaction mixture was stirred for 1 h at ambient temperature. The solution was transferred to an NMR tube and analyzed by  $^{13}\text{C}$  NMR spectroscopy (Figure S8). Methanol- $d_4$  (600  $\mu\text{L}$ ) was added and the sample was again analyzed by  $^{13}\text{C}$  NMR spectroscopy (Figure S9).

## 4. XRD Data

### 4.1 General Procedure

Single crystals of structurally characterized compounds were grown as described in Section S2. Suitable crystals were selected under the atmosphere of an argon filled glove box and tip-mounted on a Rigaku R-Axis SPIDER IP or Bruker APEX-II CCD diffractometer. The crystals were kept at 100 K during data collection. Using Olex2,<sup>13</sup> the structure was solved with the ShelXT<sup>14</sup> structure solution program using Intrinsic Phasing and refined with the SHELXL<sup>15</sup> refinement package using Least Squares minimization.

### 4.2 Refinement Details

**Table S5:** Refinement details of crystal structures of ligand potassium salt.

| Compound                                     | K(thf)[ <sup>tbu</sup> diket]                                      |
|----------------------------------------------|--------------------------------------------------------------------|
| Empirical formula                            | C <sub>90</sub> H <sub>161.64</sub> K <sub>6</sub> O <sub>18</sub> |
| Formula weight                               | 1766.42                                                            |
| Temperature [K]                              | 100.15                                                             |
| Crystal system                               | triclinic                                                          |
| Space group                                  | P-1                                                                |
| a [Å]                                        | 20.6538(2)                                                         |
| b [Å]                                        | 25.2668(2)                                                         |
| c [Å]                                        | 25.4854(2)                                                         |
| α [°]                                        | 119.0280(10)                                                       |
| β [°]                                        | 90.1910(10)                                                        |
| γ [°]                                        | 112.3480(10)                                                       |
| Volume [Å <sup>3</sup> ]                     | 10461.43(19)                                                       |
| Z                                            | 4                                                                  |
| ρ <sub>calc</sub> [cm <sup>3</sup> ]         | 1.122                                                              |
| μ [mm <sup>-1</sup> ]                        | 2.679                                                              |
| F(000)                                       | 3839.0                                                             |
| Crystal size [mm <sup>3</sup> ]              | 0.471 × 0.164 × 0.079                                              |
| Radiation                                    | Cu Kα (λ = 1.54184)                                                |
| 2θ range for data collection [°]             | 4.446 to 136.502                                                   |
| Index ranges                                 | -24 ≤ h ≤ 24, -30 ≤ k ≤ 30, -26 ≤ l ≤ 30                           |
| Reflections collected                        | 142028                                                             |
| Independent reflections                      | 38218 [R <sub>int</sub> = 0.0780, R <sub>sigma</sub> = 0.0603]     |
| Data/restraints/parameters                   | 38218/3048/2670                                                    |
| Goodness-of-fit on F <sup>2</sup>            | 1.063                                                              |
| Final R indexes [I ≥ 2σ (I)]                 | R <sub>1</sub> = 0.0950, wR <sub>2</sub> = 0.2753                  |
| Final R indexes [all data]                   | R <sub>1</sub> = 0.1187, wR <sub>2</sub> = 0.3002                  |
| Largest diff. peak/hole [e Å <sup>-3</sup> ] | 1.28/-0.96                                                         |

**Table S6:** Refinement details of crystal structures of Mo(IV) complexes .

| Compound                                     | [Mo( <sup>Me</sup> diket) <sub>3</sub> ]PF <sub>6</sub>                                        | [Mo( <sup>Bu</sup> diket) <sub>3</sub> ]PF <sub>6</sub>           |
|----------------------------------------------|------------------------------------------------------------------------------------------------|-------------------------------------------------------------------|
| Empirical formula                            | C <sub>30</sub> H <sub>42</sub> F <sub>12</sub> Mo <sub>2</sub> O <sub>12</sub> P <sub>2</sub> | C <sub>33</sub> H <sub>57</sub> O <sub>6</sub> F <sub>6</sub> PMo |
| Formula weight                               | 1076.45                                                                                        | 790.69                                                            |
| Temperature [K]                              | 100.00                                                                                         | 100.00                                                            |
| Crystal system                               | trigonal                                                                                       | monoclinic                                                        |
| Space group                                  | P-31c                                                                                          | P2 <sub>1</sub> /n                                                |
| a [Å]                                        | 10.6761(3)                                                                                     | 19.1980(7)                                                        |
| b [Å]                                        | 10.6761(3)                                                                                     | 9.9251(3)                                                         |
| c [Å]                                        | 10.3685(4)                                                                                     | 21.1389(7)                                                        |
| α [°]                                        | 90                                                                                             | 90                                                                |
| β [°]                                        | 90                                                                                             | 99.950(2)                                                         |
| γ [°]                                        | 120                                                                                            | 90                                                                |
| Volume [Å <sup>3</sup> ]                     | 1023.46(7)                                                                                     | 3967.3(2)                                                         |
| Z                                            | 1                                                                                              | 4                                                                 |
| ρ <sub>calc</sub> [cm <sup>-3</sup> ]        | 1.747                                                                                          | 1.324                                                             |
| μ [mm <sup>-1</sup> ]                        | 0.801                                                                                          | 0.436                                                             |
| F(000)                                       | 540.0                                                                                          | 1656.0                                                            |
| Crystal size [mm <sup>3</sup> ]              | 0.964 × 0.246 × 0.245                                                                          | 0.444 × 0.153 × 0.122                                             |
| Radiation                                    | MoKα (λ = 0.71073)                                                                             | MoKα (λ = 0.71073)                                                |
| 2θ range for data collection [°]             | 5.904 to 52.732                                                                                | 4.546 to 50.668                                                   |
| Index ranges                                 | -12 ≤ h ≤ 13, -13 ≤ k ≤ 11, -12 ≤ l ≤ 11                                                       | -23 ≤ h ≤ 23, -11 ≤ k ≤ 11, -25 ≤ l ≤ 25                          |
| Reflections collected                        | 4046                                                                                           | 61479                                                             |
| Independent reflections                      | 703 [R <sub>int</sub> = 0.0138, R <sub>sigma</sub> = 0.0095]                                   | 7234 [R <sub>int</sub> = 0.0546, R <sub>sigma</sub> = 0.0285]     |
| Data/restraints/parameters                   | 703/19/76                                                                                      | 7234/0/442                                                        |
| Goodness-of-fit on F <sup>2</sup>            | 1.076                                                                                          | 1.019                                                             |
| Final R indexes [I ≥ 2σ (I)]                 | R <sub>1</sub> = 0.0161, wR <sub>2</sub> = 0.0373                                              | R <sub>1</sub> = 0.0364, wR <sub>2</sub> = 0.1179                 |
| Final R indexes [all data]                   | R <sub>1</sub> = 0.0183, wR <sub>2</sub> = 0.0396                                              | R <sub>1</sub> = 0.0473, wR <sub>2</sub> = 0.1293                 |
| Largest diff. peak/hole [e Å <sup>-3</sup> ] | 0.20/-0.31                                                                                     | 1.30/-0.78                                                        |

**Table S7:** Refinement details of crystal structures of Mo(III) complexes.

| Compound                                     | [Mo( <sup>tBu</sup> diket) <sub>3</sub> ]                     | [Mo( <sup>tBu</sup> diket) <sub>2</sub> (μ <sup>2</sup> -OMe)] <sub>2</sub> |
|----------------------------------------------|---------------------------------------------------------------|-----------------------------------------------------------------------------|
| Empirical formula                            | C <sub>33</sub> H <sub>57</sub> MoO <sub>6</sub>              | C <sub>46</sub> H <sub>82</sub> Mo <sub>2</sub> O <sub>10</sub>             |
| Formula weight                               | 645.72                                                        | 986.99                                                                      |
| Temperature [K]                              | 100                                                           | 100.00                                                                      |
| Crystal system                               | monoclinic                                                    | monoclinic                                                                  |
| Space group                                  | C2/c                                                          | P2 <sub>1</sub> /n                                                          |
| a [Å]                                        | 20.0596(9)                                                    | 15.4923(5)                                                                  |
| b [Å]                                        | 17.5220(8)                                                    | 10.7879(4)                                                                  |
| c [Å]                                        | 23.4507(11)                                                   | 16.4481(5)                                                                  |
| α [°]                                        | 90                                                            | 90                                                                          |
| β [°]                                        | 112.0991(12)                                                  | 111.4060(10)                                                                |
| γ [°]                                        | 90                                                            | 90                                                                          |
| Volume [Å <sup>3</sup> ]                     | 7637.0(6)                                                     | 2559.33(15)                                                                 |
| Z                                            | 8                                                             | 2                                                                           |
| ρ <sub>calc</sub> [cm <sup>3</sup> ]         | 1.123                                                         | 1.281                                                                       |
| μ [mm <sup>-1</sup> ]                        | 0.378                                                         | 0.540                                                                       |
| F(000)                                       | 2760.0                                                        | 1044.0                                                                      |
| Crystal size [mm <sup>3</sup> ]              | 0.314 × 0.145 × 0.116                                         | 0.15 × 0.11 × 0.08                                                          |
| Radiation                                    | MoKα (λ = 0.71073)                                            | MoKα (λ = 0.71073)                                                          |
| 2θ range for data collection [°]             | 3.194 to 52.744                                               | 4.532 to 52.762                                                             |
| Index ranges                                 | -25 ≤ h ≤ 25, -21 ≤ k ≤ 21, -29 ≤ l ≤ 29                      | -19 ≤ h ≤ 19, -13 ≤ k ≤ 13, -20 ≤ l ≤ 20                                    |
| Reflections collected                        | 66874                                                         | 66144                                                                       |
| Independent reflections                      | 7831 [R <sub>int</sub> = 0.0510, R <sub>sigma</sub> = 0.0291] | 5247 [R <sub>int</sub> = 0.0422, R <sub>sigma</sub> = 0.0171]               |
| Data/restraints/parameters                   | 7831/528/481                                                  | 5247/30/275                                                                 |
| Goodness-of-fit on F <sup>2</sup>            | 1.004                                                         | 1.075                                                                       |
| Final R indexes [I >= 2σ (I)]                | R <sub>1</sub> = 0.0336, wR <sub>2</sub> = 0.0784             | R <sub>1</sub> = 0.0528, wR <sub>2</sub> = 0.1326                           |
| Final R indexes [all data]                   | R <sub>1</sub> = 0.0696, wR <sub>2</sub> = 0.0931             | R <sub>1</sub> = 0.0635, wR <sub>2</sub> = 0.1458                           |
| Largest diff. peak/hole [e Å <sup>-3</sup> ] | 0.24/-0.28                                                    | 1.58/-0.65                                                                  |

**Table S8:** Refinement details of crystal structures of bis(<sup>R</sup>diket) Mo(II) complexes.

| Compound                                     | [Mo( <sup>Me</sup> diket) <sub>2</sub> (py) <sub>2</sub> ]      | [Mo( <sup>Me</sup> diket) <sub>2</sub> (PEt <sub>3</sub> ) <sub>2</sub> ] | [Mo( <sup>tBu</sup> diket) <sub>2</sub> (py) <sub>2</sub> ]     | [Mo( <sup>tBu</sup> diket) <sub>2</sub> (PEt <sub>3</sub> ) <sub>2</sub> ] |
|----------------------------------------------|-----------------------------------------------------------------|---------------------------------------------------------------------------|-----------------------------------------------------------------|----------------------------------------------------------------------------|
| Empirical formula                            | C <sub>20</sub> H <sub>24</sub> MoN <sub>2</sub> O <sub>4</sub> | C <sub>22</sub> H <sub>44</sub> MoO <sub>4</sub> P <sub>2</sub>           | C <sub>32</sub> H <sub>48</sub> MoN <sub>2</sub> O <sub>4</sub> | C <sub>34</sub> H <sub>68</sub> MoO <sub>4</sub> P <sub>2</sub>            |
| Formula weight                               | 452.35                                                          | 530.45                                                                    | 620.66                                                          | 698.76                                                                     |
| Temperature [K]                              | 100.00                                                          | 100.00                                                                    | 100.01(10)                                                      | 100.01                                                                     |
| Crystal system                               | monoclinic                                                      | monoclinic                                                                | triclinic                                                       | monoclinic                                                                 |
| Space group                                  | P2 <sub>1</sub> /c                                              | P2 <sub>1</sub> /n                                                        | P-1                                                             | P2 <sub>1</sub> /c                                                         |
| a [Å]                                        | 7.92030(10)                                                     | 11.1689(7)                                                                | 9.6659(4)                                                       | 9.9377(16)                                                                 |
| b [Å]                                        | 14.2390(2)                                                      | 9.9499(7)                                                                 | 9.8520(6)                                                       | 11.7816(19)                                                                |
| c [Å]                                        | 9.1048(2)                                                       | 12.3849(8)                                                                | 10.9941(8)                                                      | 16.636(3)                                                                  |
| α [°]                                        | 90                                                              | 90                                                                        | 115.997(7)                                                      | 90                                                                         |
| β [°]                                        | 110.561(2)                                                      | 102.858(2)                                                                | 102.344(5)                                                      | 106.552(2)                                                                 |
| γ [°]                                        | 90                                                              | 90                                                                        | 104.827(4)                                                      | 90                                                                         |
| Volume [Å <sup>3</sup> ]                     | 961.40(3)                                                       | 1341.81(15)                                                               | 843.25(10)                                                      | 1867.1(5)                                                                  |
| Z                                            | 2                                                               | 2                                                                         | 1                                                               | 2                                                                          |
| ρ <sub>calc</sub> [cm <sup>3</sup> ]         | 1.563                                                           | 1.313                                                                     | 1.222                                                           | 1.243                                                                      |
| μ [mm <sup>-1</sup> ]                        | 0.710                                                           | 0.631                                                                     | 0.423                                                           | 0.470                                                                      |
| F(000)                                       | 464.0                                                           | 560.0                                                                     | 328.0                                                           | 752.0                                                                      |
| Crystal size [mm <sup>3</sup> ]              | 0.291 × 0.211 × 0.172                                           | 0.979 × 0.762 × 0.516                                                     | 0.4 × 0.258 × 0.12                                              | 0.241 × 0.168 × 0.148                                                      |
| Radiation                                    | MoKα (λ = 0.71073)                                              | MoKα (λ = 0.71073)                                                        | Mo Kα (λ = 0.71073)                                             | MoKα (λ = 0.71073)                                                         |
| 2θ range for data collection [°]             | 5.494 to 65.292                                                 | 6.044 to 61.012                                                           | 4.446 to 50.7                                                   | 4.276 to 50.692                                                            |
| Index ranges                                 | -10 ≤ h ≤ 11, -20 ≤ k ≤ 21, -13 ≤ l ≤ 12                        | -15 ≤ h ≤ 12, -14 ≤ k ≤ 14, 17 ≤ l ≤ 17                                   | -11 ≤ h ≤ 11, -11 ≤ k ≤ 10, 0 ≤ l ≤ 13                          | -11 ≤ h ≤ 11, -13 ≤ k ≤ 13, -19 ≤ l ≤ 20                                   |
| Reflections collected                        | 5918                                                            | 27173                                                                     | 3100                                                            | 8132                                                                       |
| Independent reflections                      | 3175 [R <sub>int</sub> = 0.0180, R <sub>sigma</sub> = 0.0276]   | 4044 [R <sub>int</sub> = 0.0175, R <sub>sigma</sub> = 0.0134]             | 3100 [R <sub>int</sub> = ?, R <sub>sigma</sub> = 0.0387]        | 3341 [R <sub>int</sub> = 0.0660, R <sub>sigma</sub> = 0.0867]              |
| Data/restraints/parameters                   | 3175/0/172                                                      | 4044/0/221                                                                | 3100/0/185                                                      | 3341/0/196                                                                 |
| Goodness-of-fit on F <sup>2</sup>            | 1.062                                                           | 1.166                                                                     | 1.129                                                           | 0.996                                                                      |
| Final R indexes [I > 2σ (I)]                 | R <sub>1</sub> = 0.0231, wR <sub>2</sub> = 0.0543               | R <sub>1</sub> = 0.0197, wR <sub>2</sub> = 0.0461                         | R <sub>1</sub> = 0.0391, wR <sub>2</sub> = 0.1027               | R <sub>1</sub> = 0.0462, wR <sub>2</sub> = 0.0940                          |
| Final R indexes [all data]                   | R <sub>1</sub> = 0.0273, wR <sub>2</sub> = 0.0561               | R <sub>1</sub> = 0.0210, wR <sub>2</sub> = 0.0474                         | R <sub>1</sub> = 0.0403, wR <sub>2</sub> = 0.1035               | R <sub>1</sub> = 0.0717, wR <sub>2</sub> = 0.1041                          |
| Largest diff. peak/hole [e Å <sup>-3</sup> ] | 0.48/-0.61                                                      | 0.44/-0.57                                                                | 2.15/-0.85                                                      | 0.72/-0.50                                                                 |

**Table S9:** Refinement details of crystal structures of reduced <sup>tBu</sup>diket-supported complexes. <sup>a</sup> 0.5 C<sub>6</sub>H<sub>6</sub> and 2 <sup>n</sup>pentane molecules co-crystallized. <sup>b</sup> 4 THF molecules co-crystallized.

| Compound                                     | K(MeCN) <sub>2</sub> [Mo( <sup>tBu</sup> diket) <sub>3</sub> ]   | K( <sup>tBu</sup> diket)[Mo( <sup>tBu</sup> diket) <sub>3</sub> ] | K(15-c-5)[Mo( <sup>tBu</sup> diket) <sub>3</sub> ]                              | K(18-c-6)[Mo( <sup>tBu</sup> diket) <sub>3</sub> ] <sup>b</sup>                 |
|----------------------------------------------|------------------------------------------------------------------|-------------------------------------------------------------------|---------------------------------------------------------------------------------|---------------------------------------------------------------------------------|
| Empirical formula                            | C <sub>37</sub> H <sub>63</sub> KMoN <sub>2</sub> O <sub>6</sub> | C <sub>44</sub> H <sub>76</sub> K <sub>2</sub> MoO <sub>8</sub>   | C <sub>94</sub> H <sub>165</sub> K <sub>2</sub> Mo <sub>2</sub> O <sub>22</sub> | C <sub>94</sub> H <sub>165</sub> K <sub>2</sub> Mo <sub>2</sub> O <sub>22</sub> |
| Formula weight                               | 766.93                                                           | 907.18                                                            | 1917.33                                                                         | 1921.36                                                                         |
| Temperature [K]                              | 100.00                                                           | 100.00(10)                                                        | 100.00(10)                                                                      | 100.0                                                                           |
| Crystal system                               | monoclinic                                                       | monoclinic                                                        | monoclinic                                                                      | monoclinic                                                                      |
| Space group                                  | C2/c                                                             | P2 <sub>1</sub> /n                                                | I2/a                                                                            | P2 <sub>1</sub> /n                                                              |
| a [Å]                                        | 19.8789(10)                                                      | 20.7616(8)                                                        | 42.1214(5)                                                                      | 12.6846(5)                                                                      |
| b [Å]                                        | 19.2756(9)                                                       | 11.3642(4)                                                        | 17.67080(10)                                                                    | 34.4038(13)                                                                     |
| c [Å]                                        | 21.7938(9)                                                       | 21.1142(8)                                                        | 32.4322(4)                                                                      | 24.7112(10)                                                                     |
| α [°]                                        | 90                                                               | 90                                                                | 90                                                                              | 90                                                                              |
| β [°]                                        | 98.043(2)                                                        | 90.651(3)                                                         | 112.111(2)                                                                      | 102.3150(10)                                                                    |
| γ [°]                                        | 90                                                               | 90                                                                | 90                                                                              | 90                                                                              |
| Volume [Å <sup>3</sup> ]                     | 8268.8(7)                                                        | 4981.3(3)                                                         | 22364.6(5)                                                                      | 10535.8(7)                                                                      |
| Z                                            | 8                                                                | 4                                                                 | 8                                                                               | 4                                                                               |
| ρ <sub>calc</sub> [cm <sup>3</sup> ]         | 1.232                                                            | 1.210                                                             | 1.139                                                                           | 1.211                                                                           |
| μ [mm <sup>-1</sup> ]                        | 0.459                                                            | 0.475                                                             | 2.978                                                                           | 0.380                                                                           |
| F(000)                                       | 3264.0                                                           | 1936.0                                                            | 8216.0                                                                          | 4124.0                                                                          |
| Crystal size [mm <sup>3</sup> ]              | 0.774 × 0.278 × 0.136                                            | 0.31 × 0.148 × 0.069                                              | 0.219 × 0.114 × 0.075                                                           | 0.348 × 0.32 × 0.19                                                             |
| Radiation                                    | MoKα (λ = 0.71073)                                               | Mo Kα (λ = 0.71073)                                               | Cu Kα (λ = 1.54184)                                                             | MoKα (λ = 0.71073)                                                              |
| 2θ range for data collection [°]             | 4.562 to 52.746                                                  | 3.924 to 50.698                                                   | 5.802 to 160.832                                                                | 4.65 to 52.746                                                                  |
| Index ranges                                 | -24 ≤ h ≤ 24, -24 ≤ k ≤ 24, -27 ≤ l ≤ 24                         | -25 ≤ h ≤ 25, -13 ≤ k ≤ 13, -25 ≤ l ≤ 25                          | -51 ≤ h ≤ 53, -13 ≤ k ≤ 22, -40 ≤ l ≤ 41                                        | -15 ≤ h ≤ 15, -43 ≤ k ≤ 43, -30 ≤ l ≤ 30                                        |
| Reflections collected                        | 73569                                                            | 61816                                                             | 85319                                                                           | 159478                                                                          |
| Independent reflections                      | 8461 [R <sub>int</sub> = 0.0255, R <sub>sigma</sub> = 0.0141]    | 9111 [R <sub>int</sub> = 0.0759, R <sub>sigma</sub> = 0.0650]     | 23757 [R <sub>int</sub> = 0.0366, R <sub>sigma</sub> = 0.0342]                  | 21530 [R <sub>int</sub> = 0.0606, R <sub>sigma</sub> = 0.0330]                  |
| Data/restraints/parameters                   | 8461/0/466                                                       | 9111/112/573                                                      | 23757/253/1121                                                                  | 21530/355/1130                                                                  |
| Goodness-of-fit on F <sup>2</sup>            | 1.048                                                            | 1.052                                                             | 1.029                                                                           | 1.113                                                                           |
| Final R indexes [I > 2σ (I)]                 | R <sub>1</sub> = 0.0200, wR <sub>2</sub> = 0.0493                | R <sub>1</sub> = 0.0539, wR <sub>2</sub> = 0.1040                 | R <sub>1</sub> = 0.0572, wR <sub>2</sub> = 0.1602                               | R <sub>1</sub> = 0.0632, wR <sub>2</sub> = 0.1496                               |
| Final R indexes [all data]                   | R <sub>1</sub> = 0.0231, wR <sub>2</sub> = 0.0507                | R <sub>1</sub> = 0.0665, wR <sub>2</sub> = 0.1110                 | R <sub>1</sub> = 0.0670, wR <sub>2</sub> = 0.1674                               | R <sub>1</sub> = 0.0778, wR <sub>2</sub> = 0.1587                               |
| Largest diff. peak/hole [e Å <sup>-3</sup> ] | 0.62/-0.63                                                       | 1.50/-0.86                                                        | 1.41/-1.14                                                                      | 1.60/-1.04                                                                      |



**Table S10:** Refinement details of crystal structures of formal Mo(I) complexes.

| Compound                                     | <b>K(thf)<sub>x</sub>[Mo(<sup>t</sup>Bu<sub>2</sub>diket)<sub>2</sub>(<sup>t</sup>Bu<sub>2</sub>diket·CO<sub>2</sub>)]</b> | <b>K<sub>2</sub>(dme)[Mo(<sup>t</sup>Bu<sub>2</sub>diket)<sub>2</sub>(<sup>t</sup>Bu<sub>2</sub>diket·CO<sub>2</sub>)]</b> | <b>K[Mo(<sup>t</sup>Bu<sub>2</sub>diket)<sub>2</sub>(<sup>t</sup>Bu<sub>2</sub>diket·H)]</b> |
|----------------------------------------------|----------------------------------------------------------------------------------------------------------------------------|----------------------------------------------------------------------------------------------------------------------------|----------------------------------------------------------------------------------------------|
| Empirical formula                            | C <sub>90</sub> H <sub>156</sub> K <sub>4</sub> Mo <sub>2</sub> O <sub>21.5</sub>                                          | C <sub>38</sub> H <sub>66</sub> K <sub>2</sub> MoO <sub>10</sub>                                                           | C <sub>33</sub> H <sub>58</sub> KMoO <sub>6</sub>                                            |
| Formula weight                               | 1930.42                                                                                                                    | 857.04                                                                                                                     | 685.83                                                                                       |
| Temperature [K]                              | 100.00(10)                                                                                                                 | 100.00(10)                                                                                                                 | 100.00(10)                                                                                   |
| Crystal system                               | triclinic                                                                                                                  | triclinic                                                                                                                  | monoclinic                                                                                   |
| Space group                                  | P-1                                                                                                                        | P-1                                                                                                                        | P2 <sub>1</sub> /c                                                                           |
| a [Å]                                        | 14.7678(7)                                                                                                                 | 20.3517(4)                                                                                                                 | 22.9432(2)                                                                                   |
| b [Å]                                        | 18.5557(8)                                                                                                                 | 21.0677(3)                                                                                                                 | 24.0368(2)                                                                                   |
| c [Å]                                        | 20.0580(12)                                                                                                                | 21.2065(4)                                                                                                                 | 20.9977(2)                                                                                   |
| α [°]                                        | 99.741(4)                                                                                                                  | 78.2300(10)                                                                                                                | 90                                                                                           |
| β [°]                                        | 106.208(5)                                                                                                                 | 83.745(2)                                                                                                                  | 111.0590(10)                                                                                 |
| γ [°]                                        | 94.304(4)                                                                                                                  | 87.352(2)                                                                                                                  | 90                                                                                           |
| Volume [Å <sup>3</sup> ]                     | 5158.3(5)                                                                                                                  | 8845.7(3)                                                                                                                  | 10806.42(18)                                                                                 |
| Z                                            | 2                                                                                                                          | 8                                                                                                                          | 12                                                                                           |
| ρ <sub>calc</sub> [cm <sup>3</sup> ]         | 1.243                                                                                                                      | 1.287                                                                                                                      | 1.265                                                                                        |
| μ [mm <sup>-1</sup> ]                        | 3.937                                                                                                                      | 4.513                                                                                                                      | 4.312                                                                                        |
| F(000)                                       | 2056.0                                                                                                                     | 3632.0                                                                                                                     | 4380.0                                                                                       |
| Crystal size [mm <sup>3</sup> ]              | 0.11 × 0.1 × 0.08                                                                                                          | 0.13 × 0.09 × 0.03                                                                                                         | 0.154 × 0.1 × 0.064                                                                          |
| Radiation                                    | Cu Kα (λ = 1.54184)                                                                                                        | Cu Kα (λ = 1.54184)                                                                                                        | Cu Kα (λ = 1.54184)                                                                          |
| 2θ range for data collection [°]             | 6.286 to 136.502                                                                                                           | 4.37 to 136.5                                                                                                              | 5.82 to 160.892                                                                              |
| Index ranges                                 | -17 ≤ h ≤ 17, -20 ≤ k ≤ 22, -24 ≤ l ≤ 24                                                                                   | -24 ≤ h ≤ 24, -25 ≤ k ≤ 22, -25 ≤ l ≤ 25                                                                                   | -14 ≤ h ≤ 28, -30 ≤ k ≤ 30, -26 ≤ l ≤ 26                                                     |
| Reflections collected                        | 55359                                                                                                                      | 125820                                                                                                                     | 106958                                                                                       |
| Independent reflections                      | 18580 [R <sub>int</sub> = 0.1290, R <sub>sigma</sub> = 0.1176]                                                             | 32365 [R <sub>int</sub> = 0.1038, R <sub>sigma</sub> = 0.0809]                                                             | 23142 [R <sub>int</sub> = 0.0407, R <sub>sigma</sub> = 0.0348]                               |
| Data/restraints/parameters                   | 18580/173/1109                                                                                                             | 32365/671/1839                                                                                                             | 23142/18/1247                                                                                |
| Goodness-of-fit on F <sup>2</sup>            | 1.034                                                                                                                      | 1.049                                                                                                                      | 1.072                                                                                        |
| Final R indexes [I ≥ 2σ (I)]                 | R <sub>1</sub> = 0.1055, wR <sub>2</sub> = 0.2685                                                                          | R <sub>1</sub> = 0.0955, wR <sub>2</sub> = 0.2431                                                                          | R <sub>1</sub> = 0.0529, wR <sub>2</sub> = 0.1406                                            |
| Final R indexes [all data]                   | R <sub>1</sub> = 0.1476, wR <sub>2</sub> = 0.2990                                                                          | R <sub>1</sub> = 0.1253, wR <sub>2</sub> = 0.2623                                                                          | R <sub>1</sub> = 0.0603, wR <sub>2</sub> = 0.1453                                            |
| Largest diff. peak/hole [e Å <sup>-3</sup> ] | 1.32/-1.67                                                                                                                 | 1.80/-1.58                                                                                                                 | 0.62/-1.35                                                                                   |

## 5. NMR Spectroscopy

### 5.1 NMR Spectra of Isolated Metal Complexes

#### 5.1.1 Mo(IV) Complexes

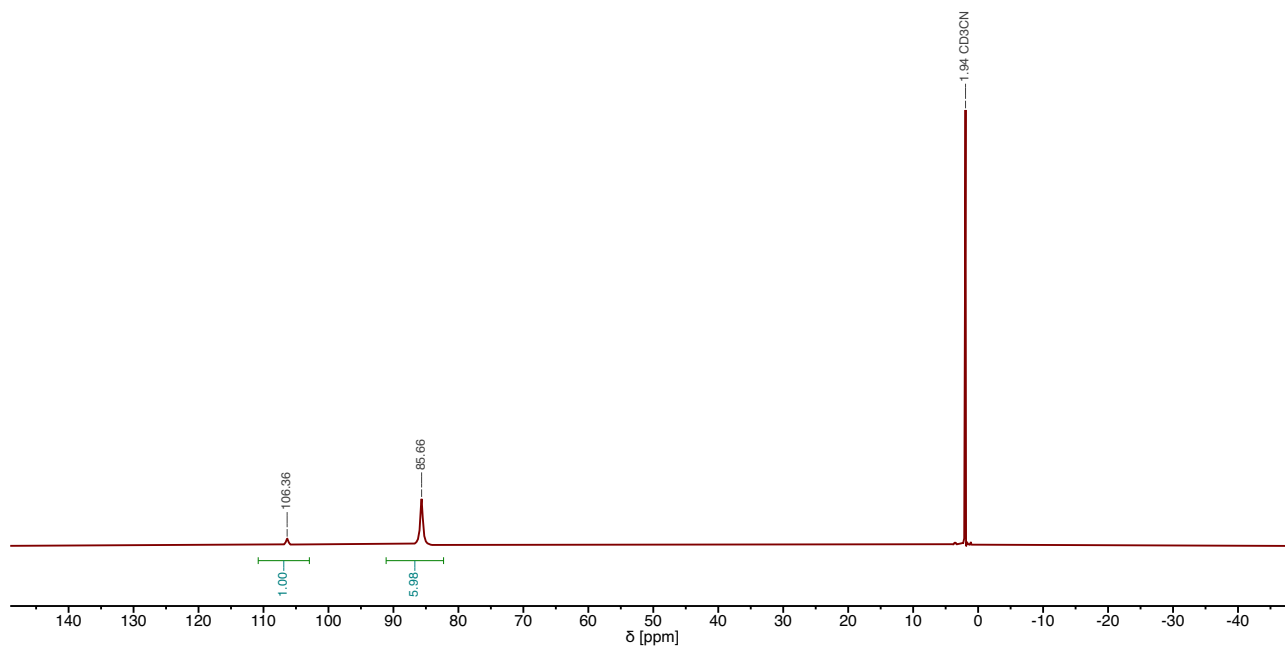

Figure S10:  $^1\text{H}$  NMR spectrum of  $[\text{Mo}(\text{Me diket})_3]\text{PF}_6$  in  $\text{MeCN-}d_3$ .

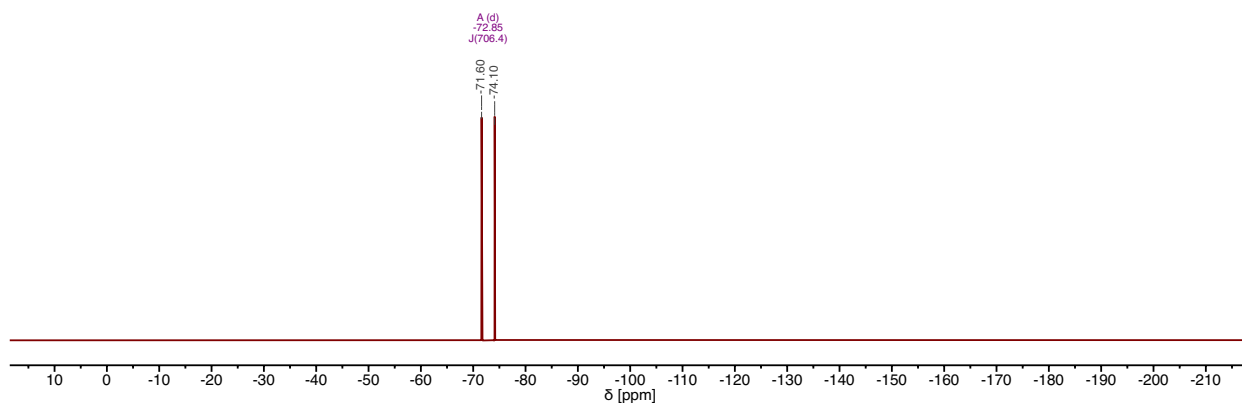

Figure S11:  $^{19}\text{F}$  NMR spectrum of  $[\text{Mo}(\text{Me diket})_3]\text{PF}_6$  in  $\text{MeCN-}d_3$ .

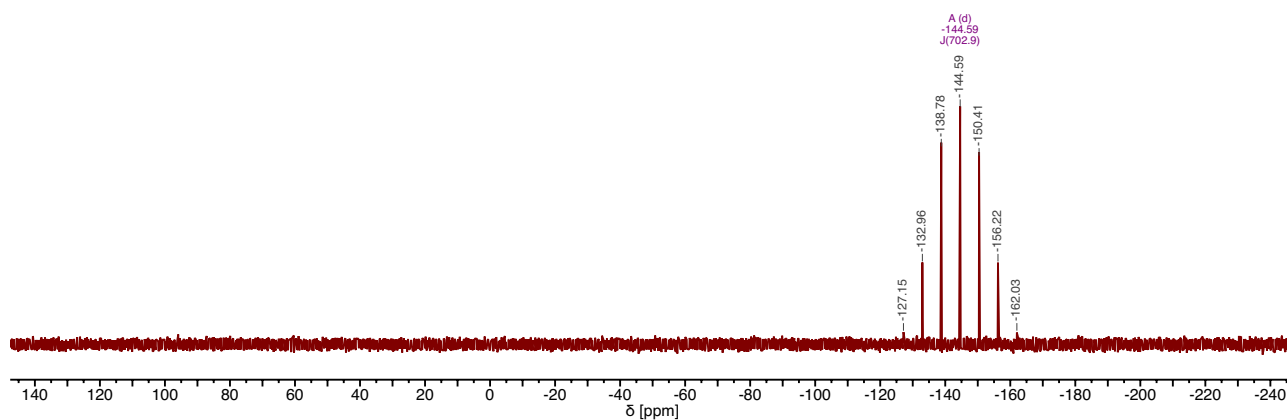

Figure S12:  $^{31}\text{P}$  NMR spectrum of  $[\text{Mo}(\text{Me diket})_3]\text{PF}_6$  in  $\text{MeCN-}d_3$ .

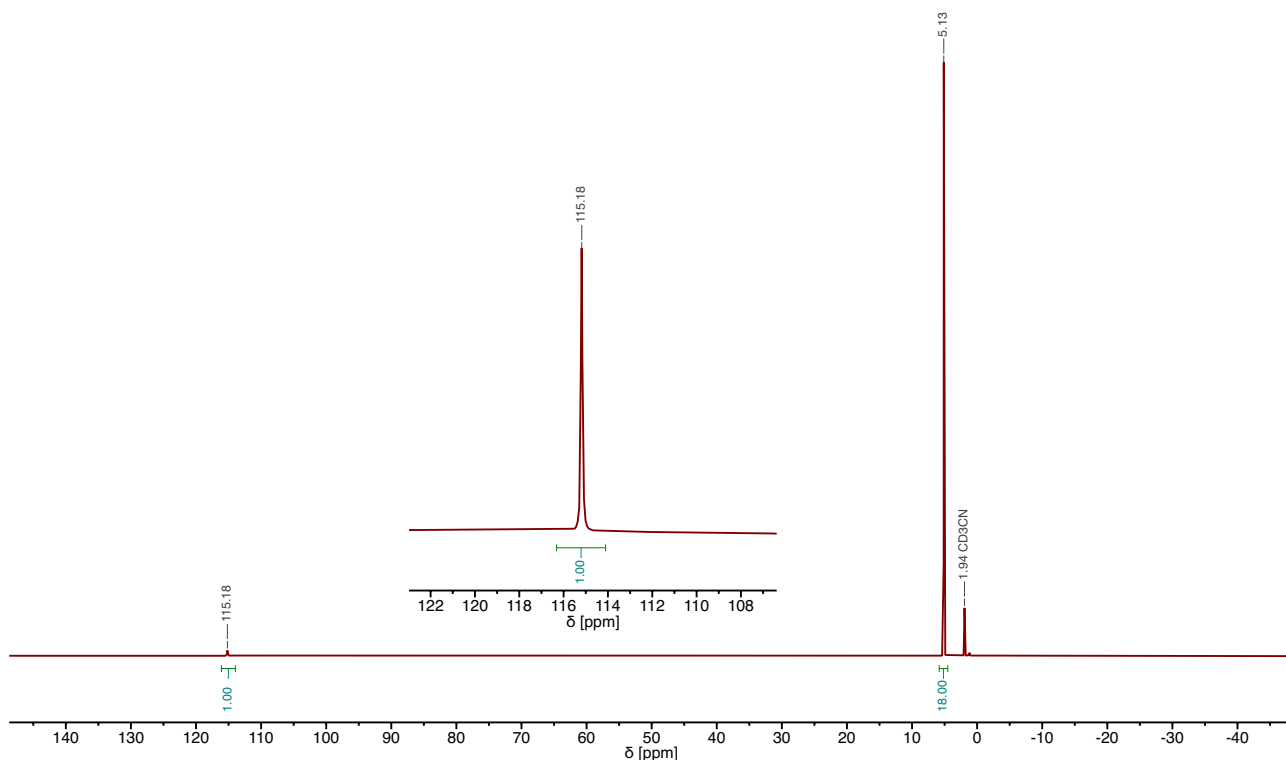

Figure S13:  $^1\text{H}$  NMR spectrum of  $[\text{Mo}(\text{tBu diket})_3]\text{PF}_6$  in  $\text{MeCN-}d_3$ .

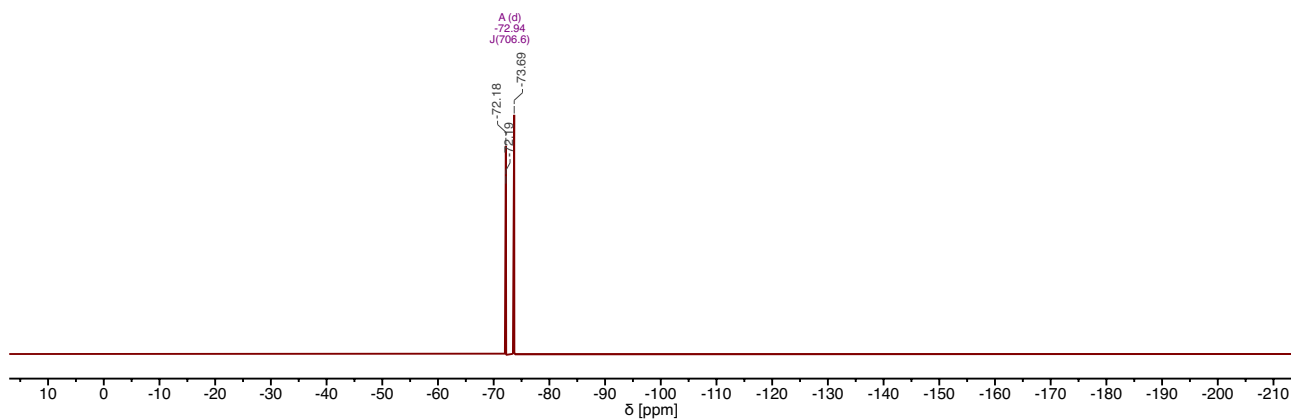

Figure S14:  $^{19}\text{F}$  NMR spectrum of  $[\text{Mo}(\text{tBu diket})_3]\text{PF}_6$  in  $\text{MeCN-}d_3$ .

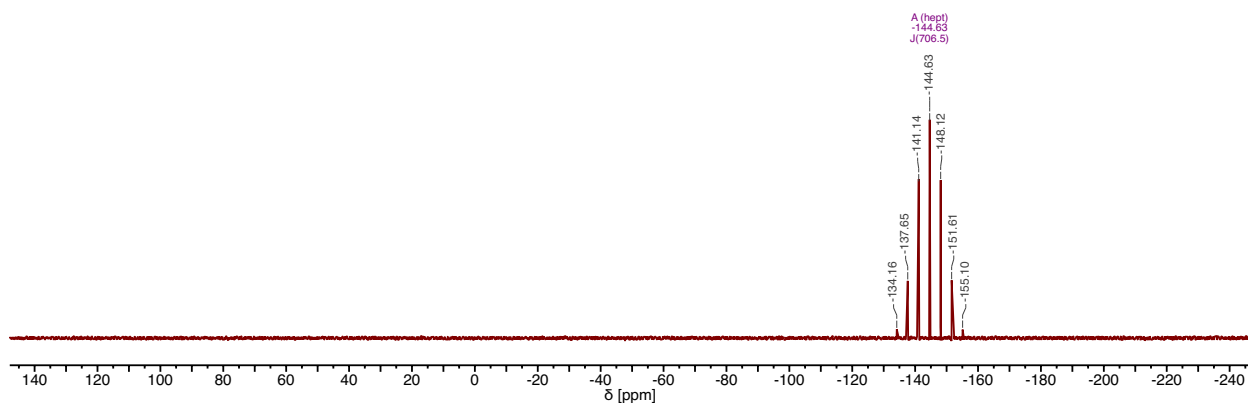

Figure S15:  $^{31}\text{P}$  NMR spectrum of  $[\text{Mo}(\text{tBu diket})_3]\text{PF}_6$  in  $\text{MeCN-}d_3$ .

## 5.1.2 Mo(III) Complexes

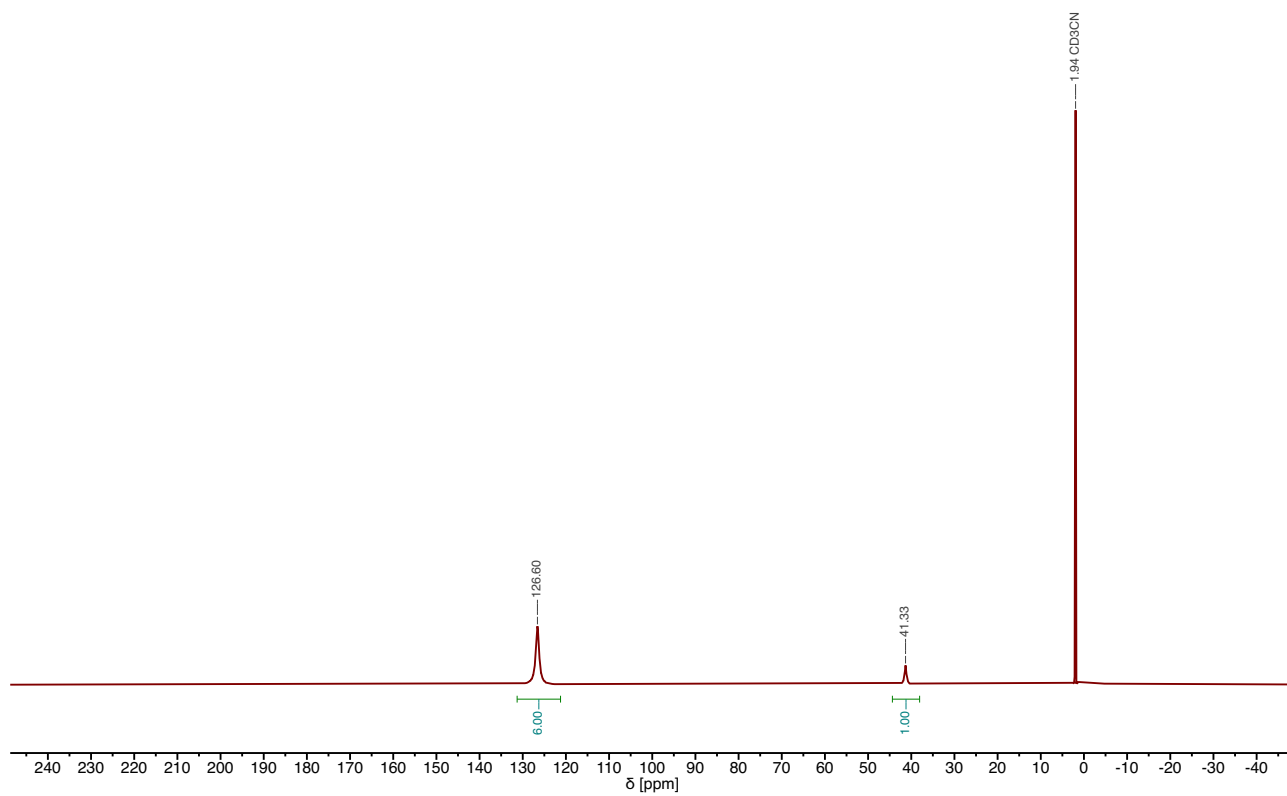

**Figure S16:**  $^1\text{H}$  NMR spectrum of  $[\text{Mo}(\text{Me diket})_3]$  in  $\text{MeCN-}d_3$ .

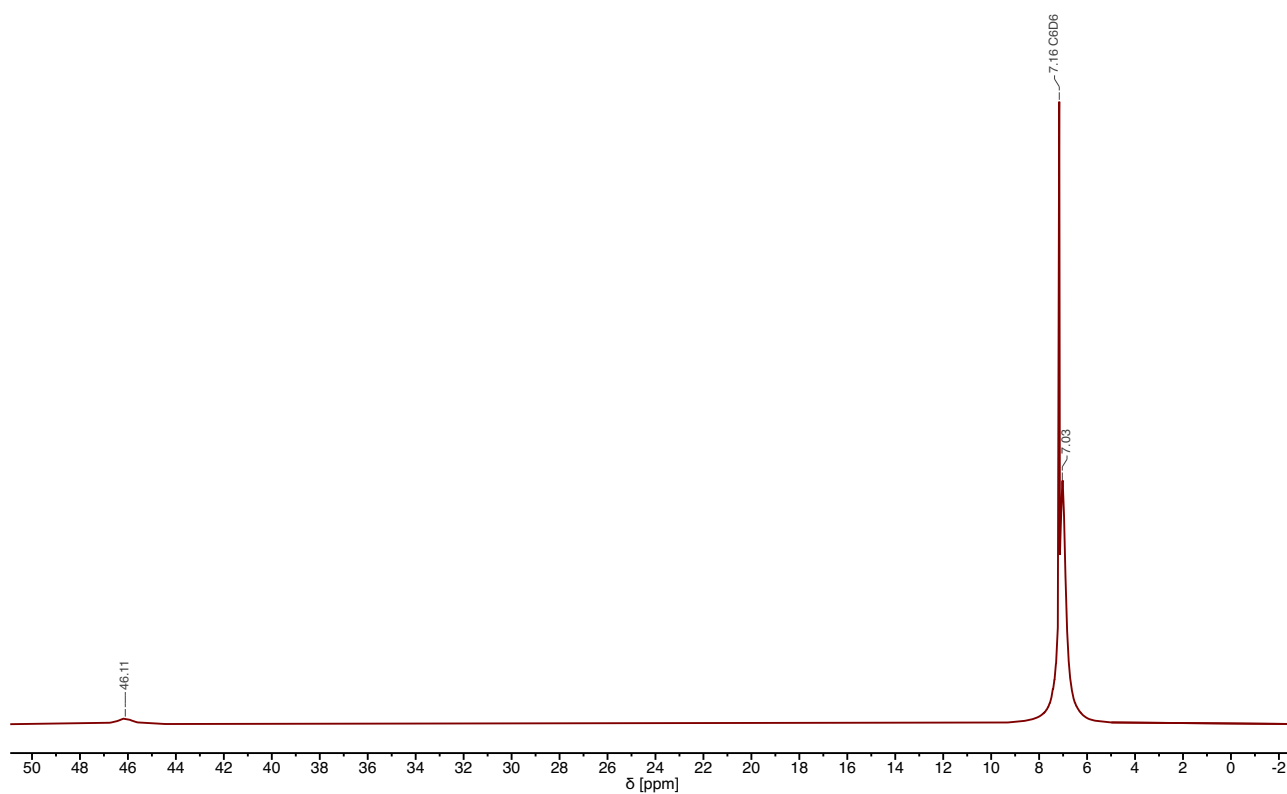

**Figure S17:**  $^1\text{H}$  NMR spectrum of  $[\text{Mo}(\text{tBu diket})_3]$  in  $\text{benzene-}d_6$ .

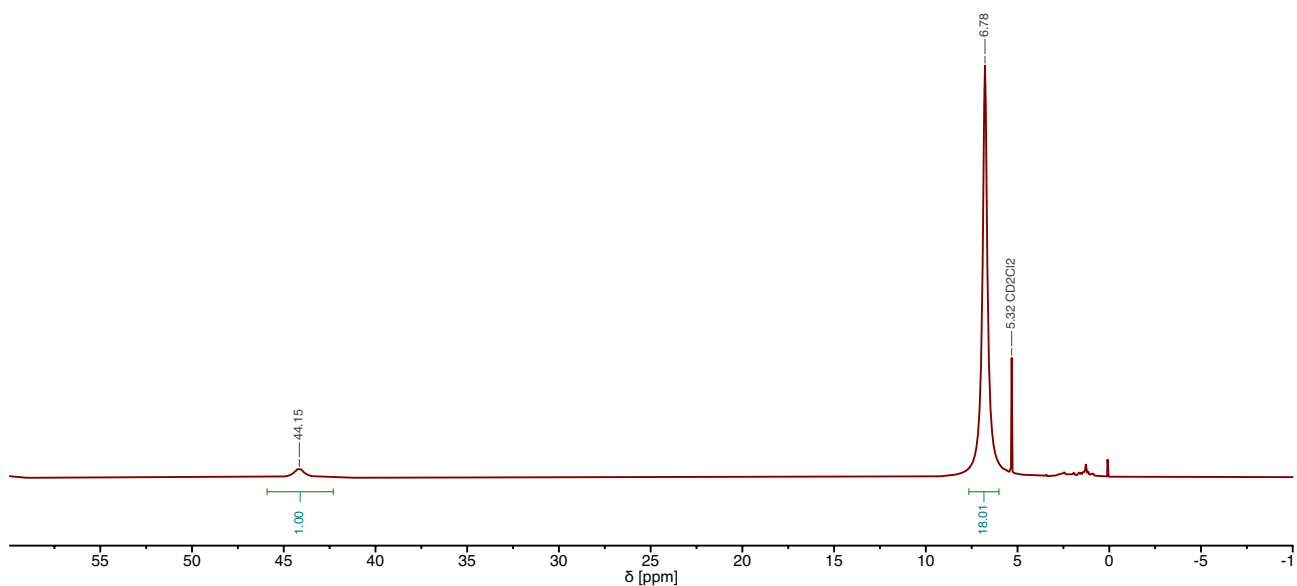

**Figure S18:**  $^1\text{H}$  NMR spectrum of  $[\text{Mo}(\text{tBu diket})_3]$  in dichloromethane- $d_2$ .

### 5.1.3 Mo(II) Complexes

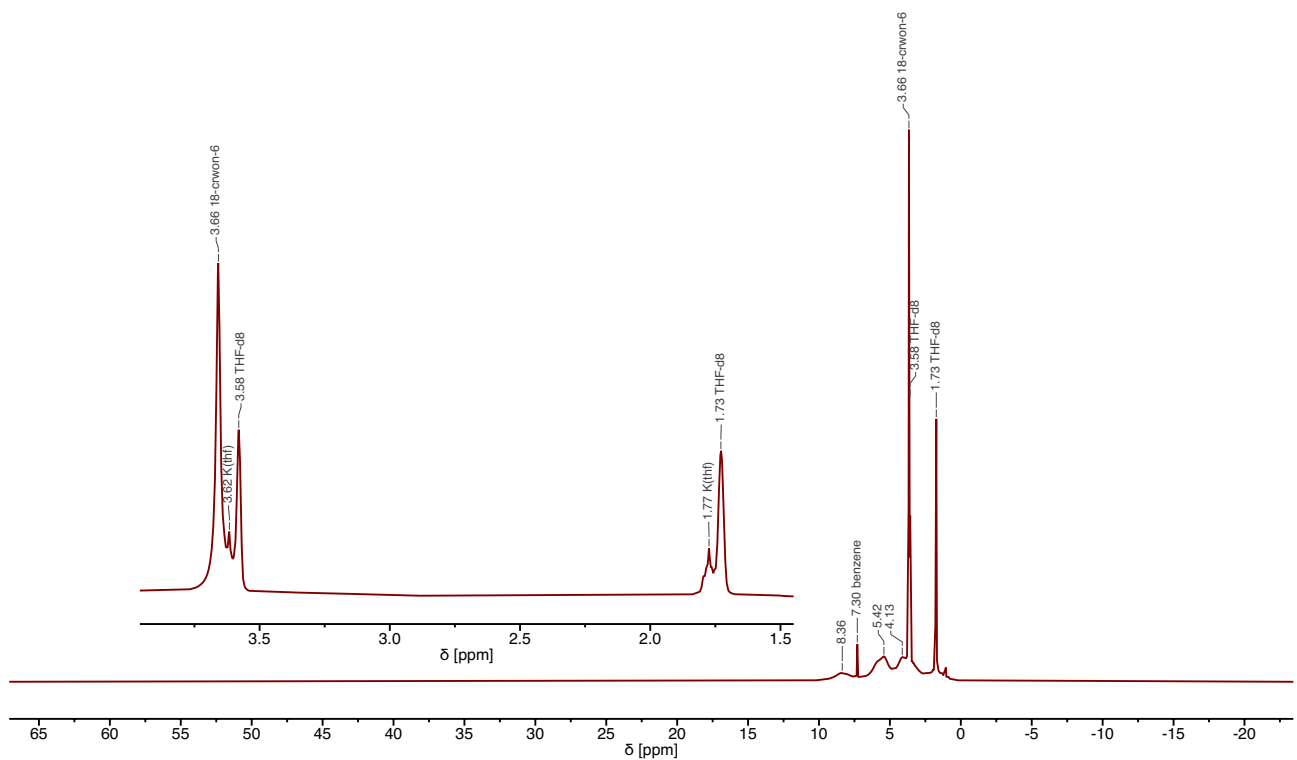

**Figure S19:**  $^1\text{H}$  NMR spectrum of  $\text{K}(\text{18-crown-6})_{0.5}(\text{thf})[\text{Mo}(\text{tBu diket})_3]$  in THF- $d_8$ .

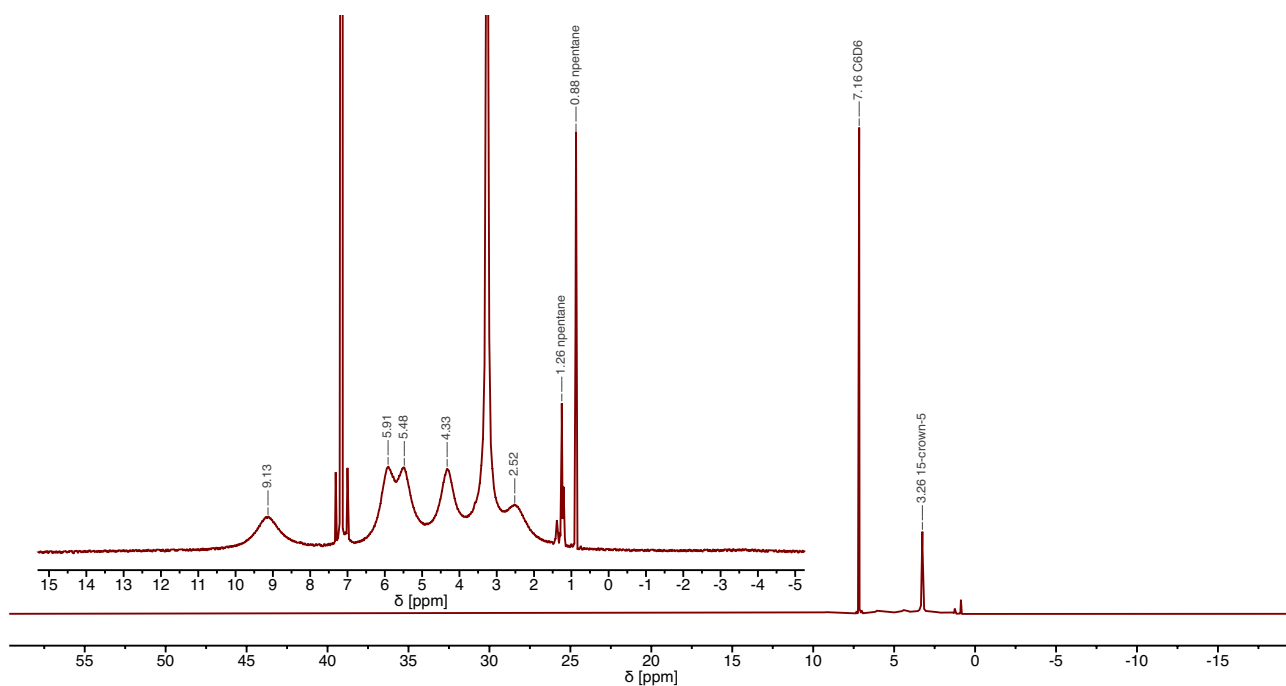

Figure S20:  $^1\text{H}$  NMR spectrum of  $\text{K}(\text{15-crown-5})[\text{Mo}(\text{tBu diket})_3]$  in  $\text{benzene-d}_6$ .

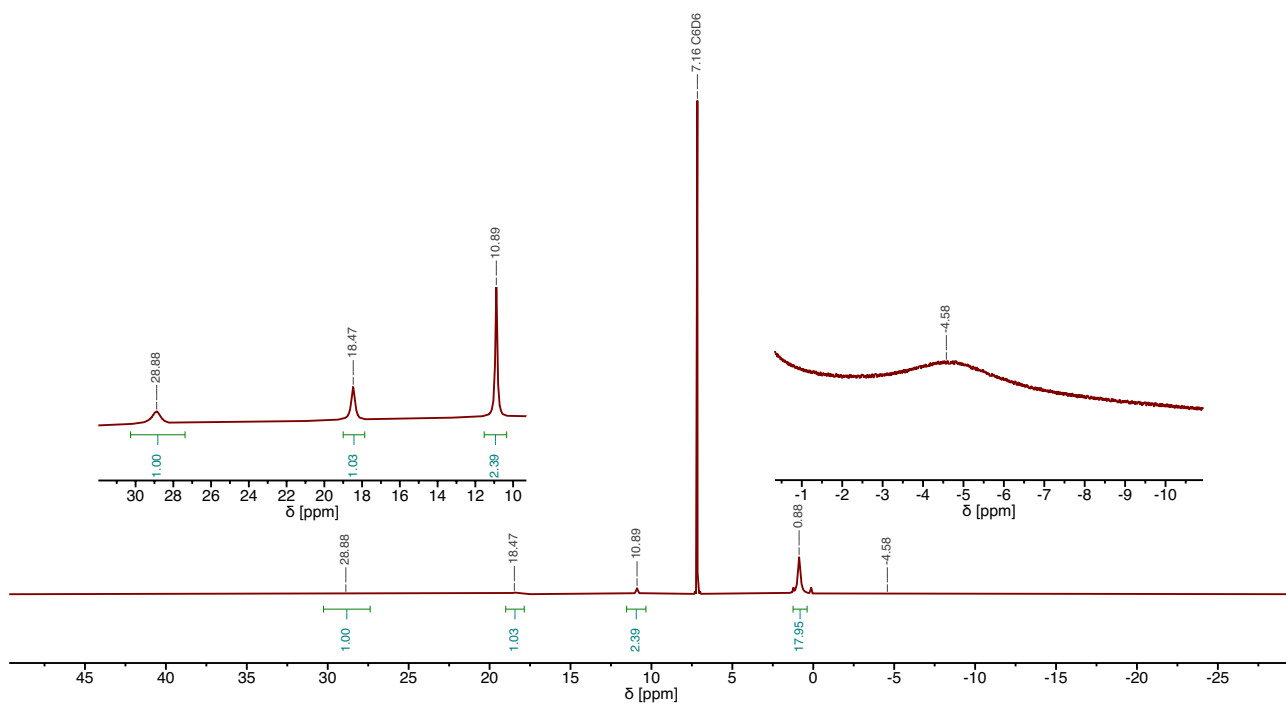

Figure S21:  $^1\text{H}$  NMR spectrum of  $[\text{Mo}(\text{tBu diket})_2(\text{py})_2]$  in  $\text{benzene-d}_6$ .

## 5.2 NMR Spectra of Reaction with CO<sub>2</sub>

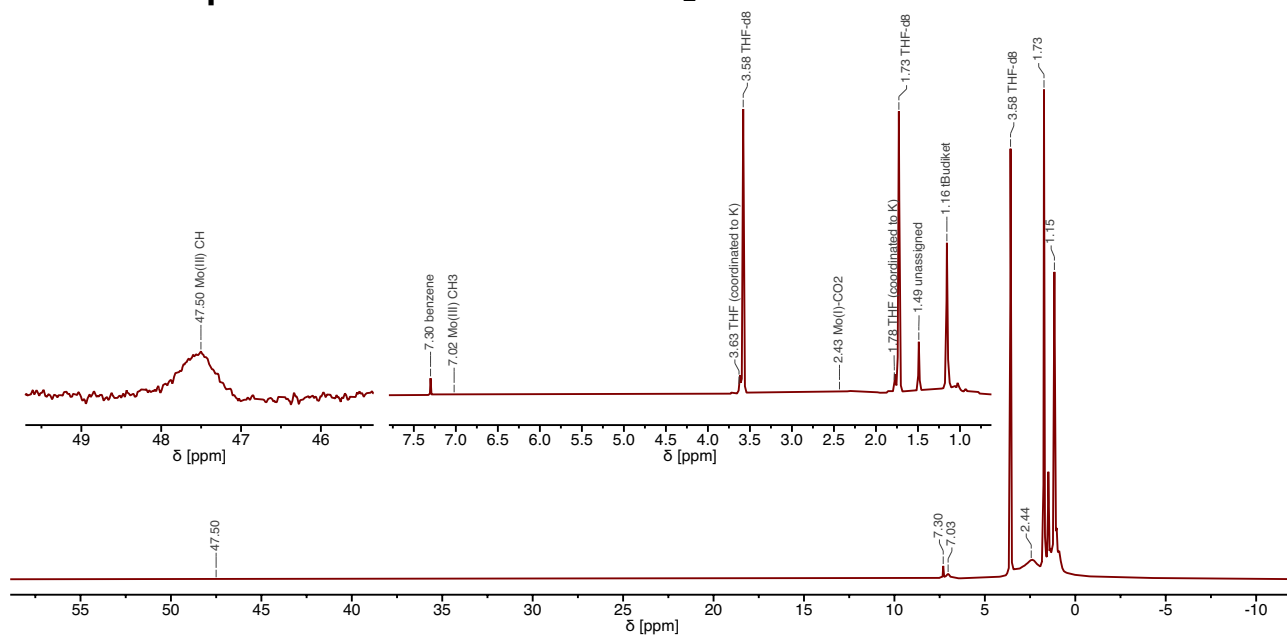

Figure S22: <sup>1</sup>H NMR spectrum of crude  $K_2[Mo(tBu\text{ diket})_2(tBu\text{ diket}\cdot CO_2)]$  in THF-*d*<sub>8</sub>.

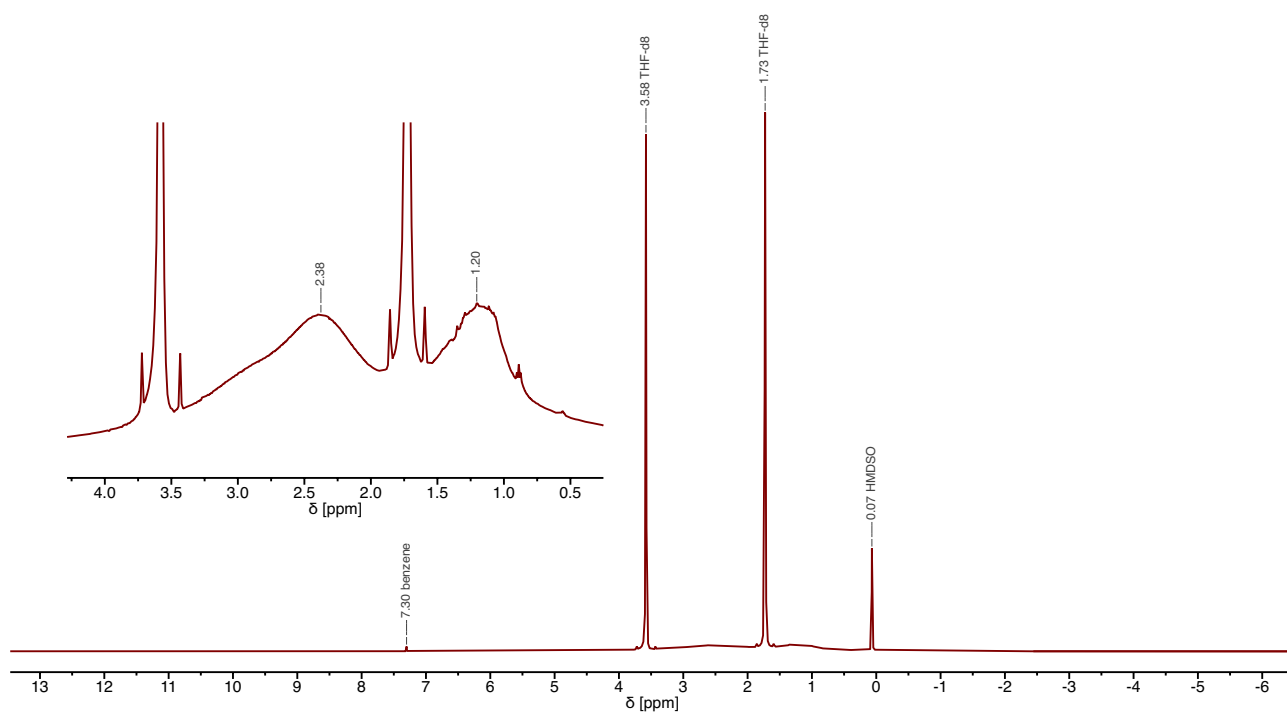

Figure S23: <sup>1</sup>H NMR spectrum of recrystallized  $K_2[Mo(tBu\text{ diket})_2(tBu\text{ diket}\cdot CO_2)]$  in THF-*d*<sub>8</sub>.

### 5.3 NMR Spectra of Reaction with CS<sub>2</sub>

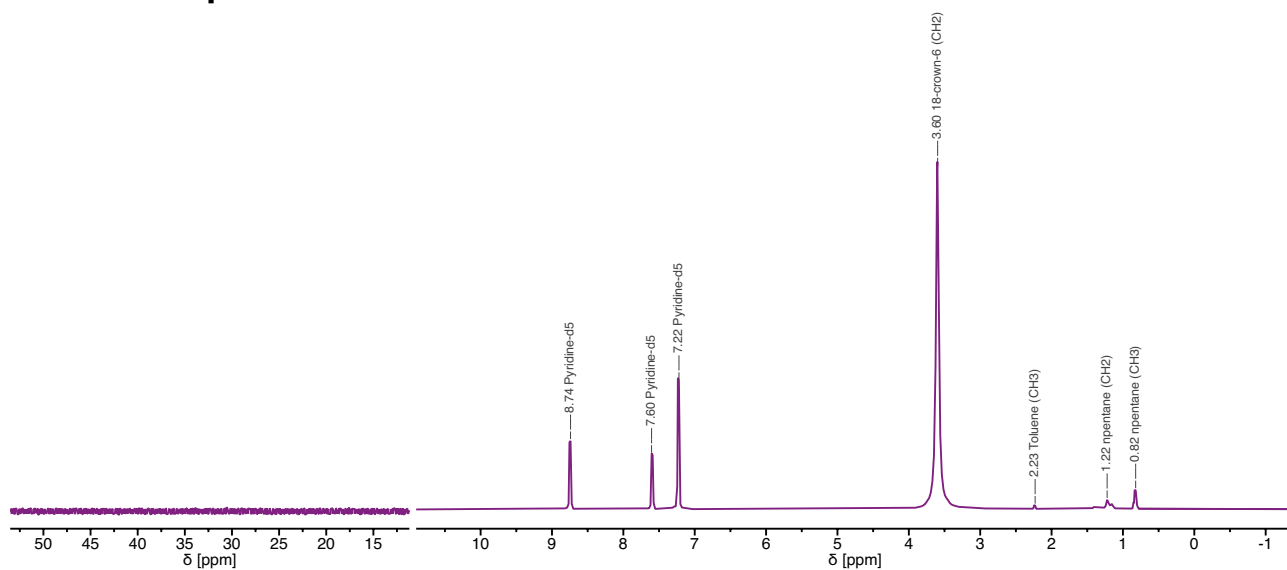

Figure S24: <sup>1</sup>H NMR spectrum of recrystallized [K(18-crown-6)]<sub>2</sub>[C<sub>2</sub>S<sub>4</sub>] in Py-d<sub>5</sub>.

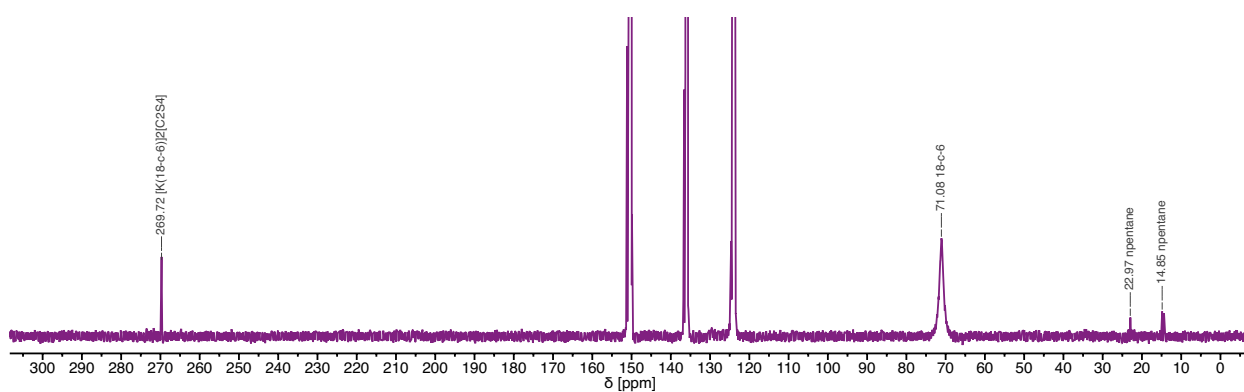

Figure S25: <sup>13</sup>C NMR spectrum of recrystallized [K(18-crown-6)]<sub>2</sub>[C<sub>2</sub>S<sub>4</sub>] in Py-d<sub>5</sub>.

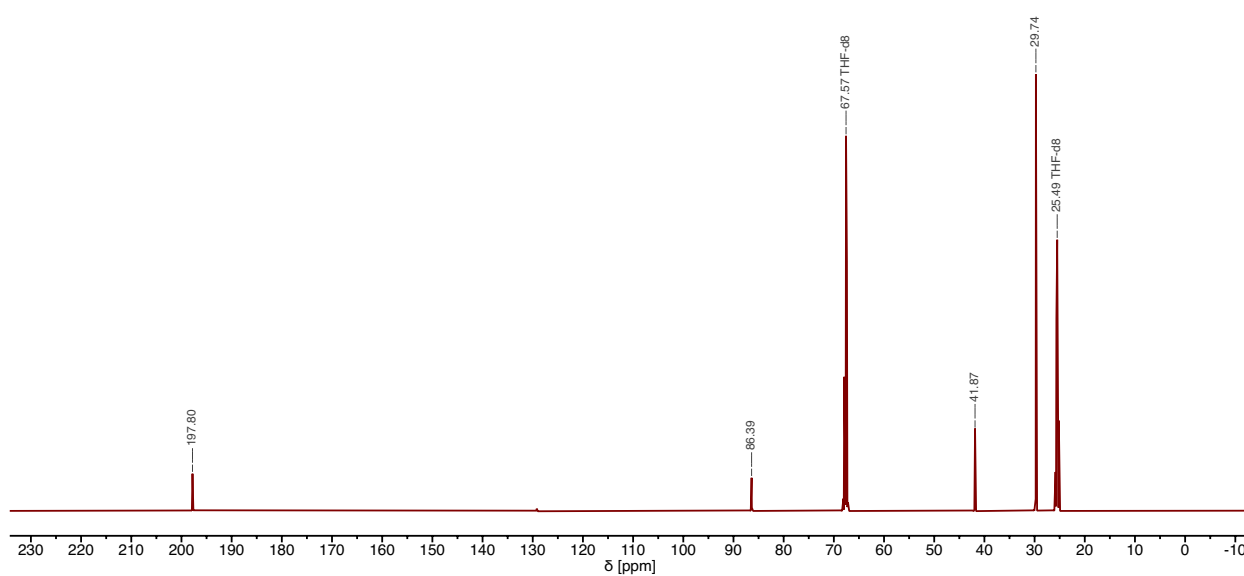

Figure S26: <sup>13</sup>C NMR spectrum of K[t<sup>Bu</sup>-diket] in THF-d<sub>8</sub>.



## 5.4 Reactivity Studies

### 5.4.1 $^{13}\text{C}_6$ + $t\text{Bu}$ diketH

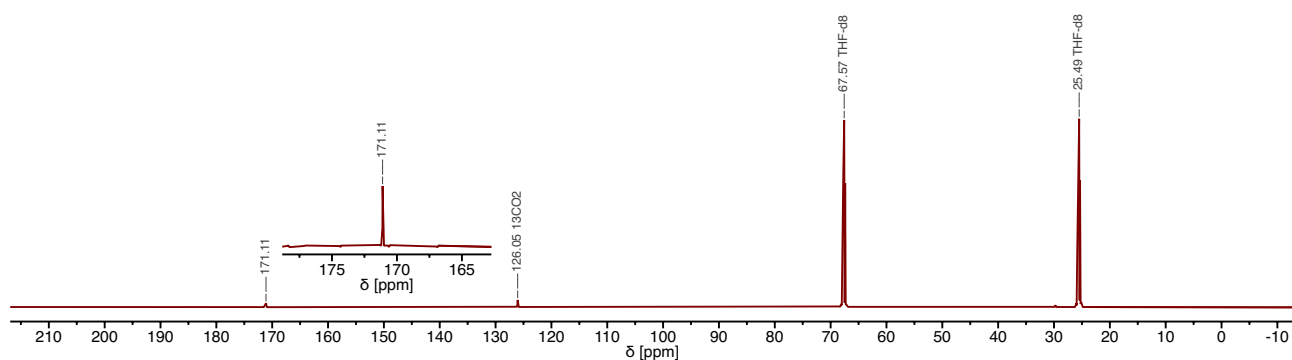

**Figure S27:**  $^{13}\text{C}$  NMR spectrum of  $^{13}\text{C}_6$  +  $t\text{Bu}$ diketH in THF- $d_8$  after 8 h at ambient temperature.

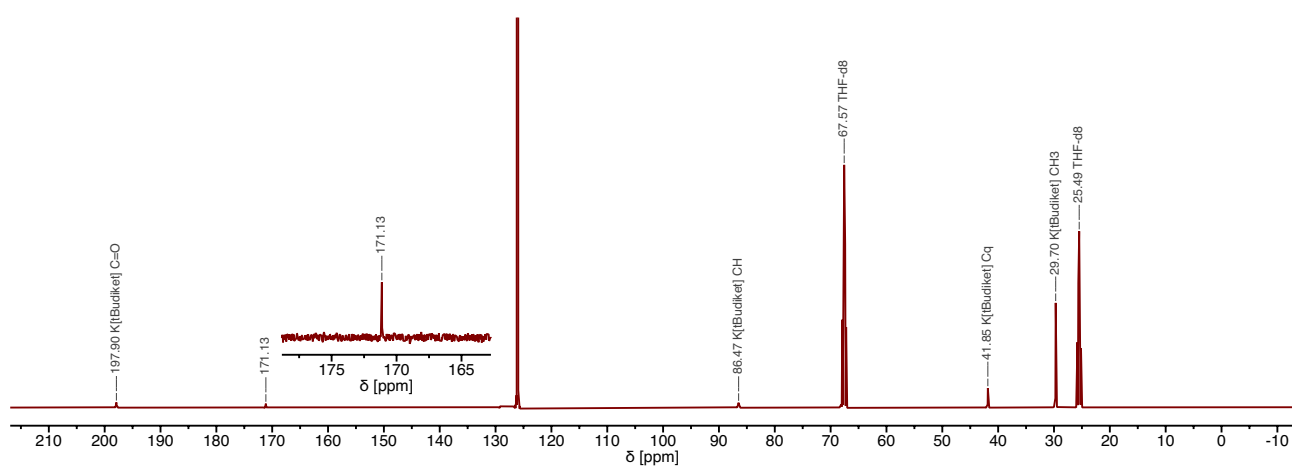

**Figure S28:**  $^{13}\text{C}$  NMR spectrum of K[ $t\text{Bu}$ diket] in THF- $d_8$  under  $^{13}\text{CO}_2$  (1 atm).

## 5.4.2 $^{13}\text{C}$ in Methanol- $d_4$

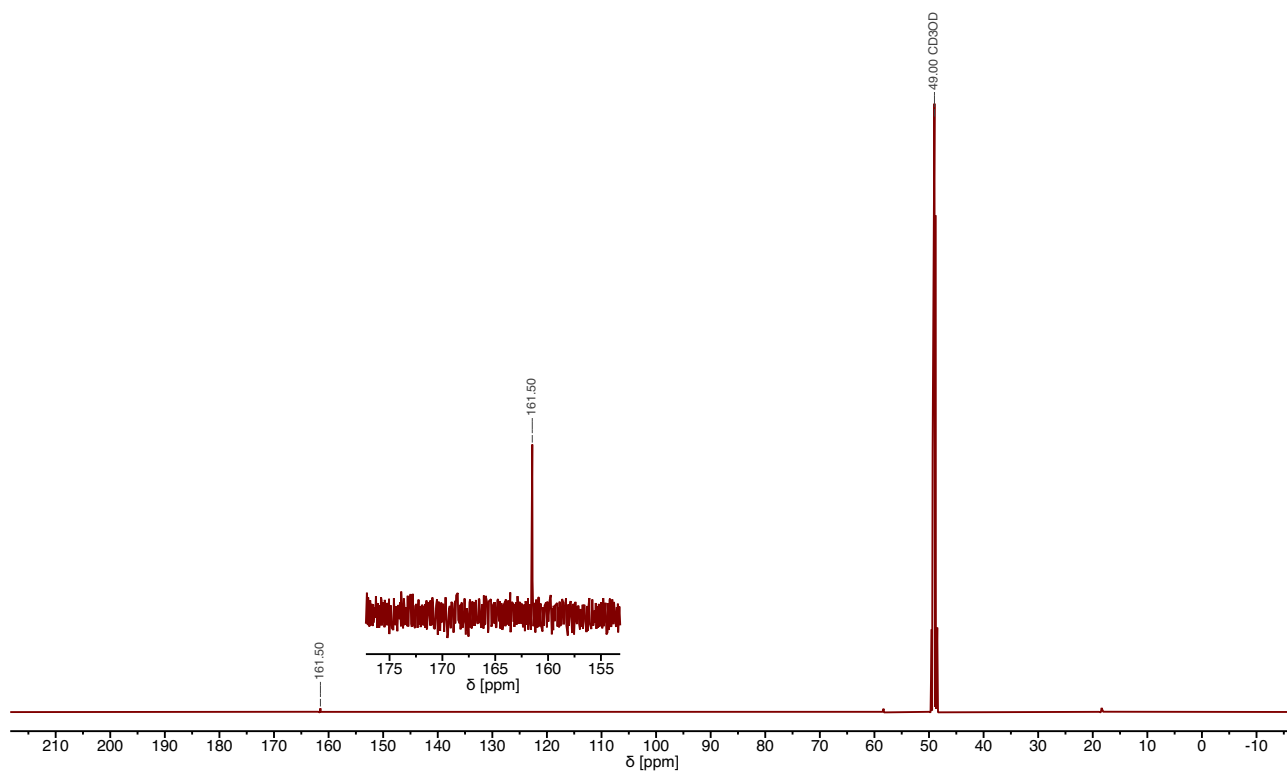

**Figure S29:**  $^{13}\text{C}$  NMR spectrum of  $^{13}\text{C}_6$  in methanol- $d_4$  after 8 h at ambient temperature.

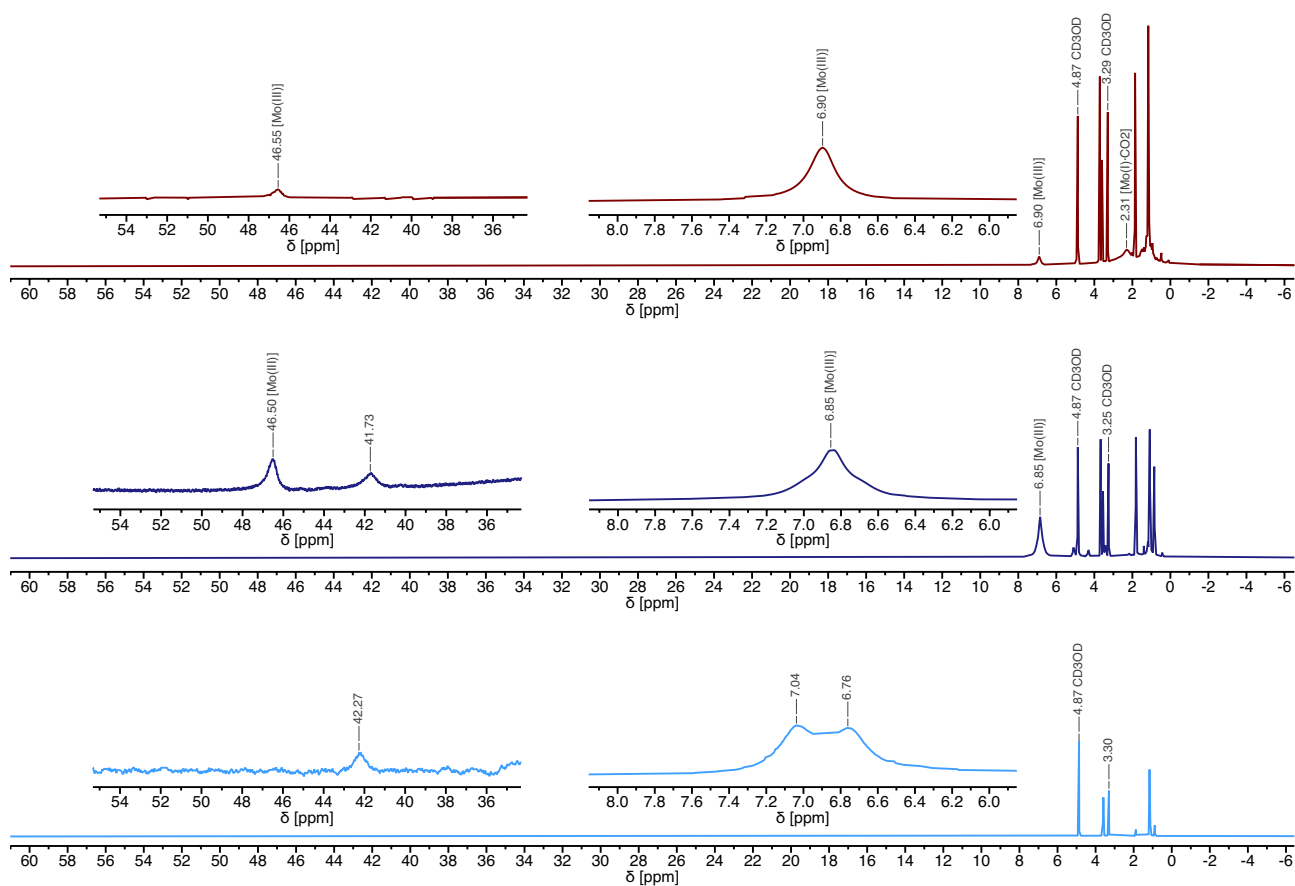

**Figure S30:**  $^1\text{H}$  NMR spectrum of  $^{13}\text{C}_6$  in methanol- $d_4$  after 10 min (*maroon, top trace*), after 8 h (*dark blue, middle trace*) at ambient temperature, and after washing with  $n$ -pentane (*light blue, bottom trace*).

### 5.4.3 $^{13}\text{C}$ in $\text{D}_2\text{O}$

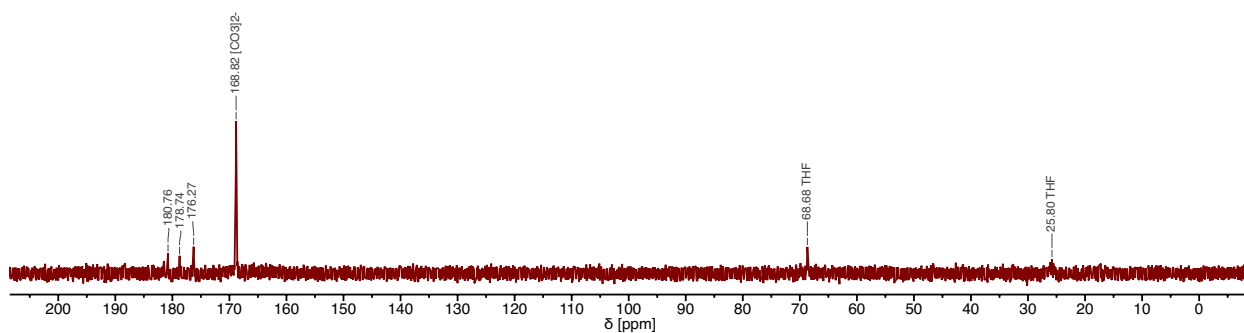

**Figure S31:**  $^{13}\text{C}$  NMR spectrum of  $^{13}\text{C}_6$  suspended in  $\text{D}_2\text{O}$  (without filtration). The chemical shift was reference using the residual THF signals.

### 5.4.41 + $\text{KC}_8$ under $\text{CO}_2$

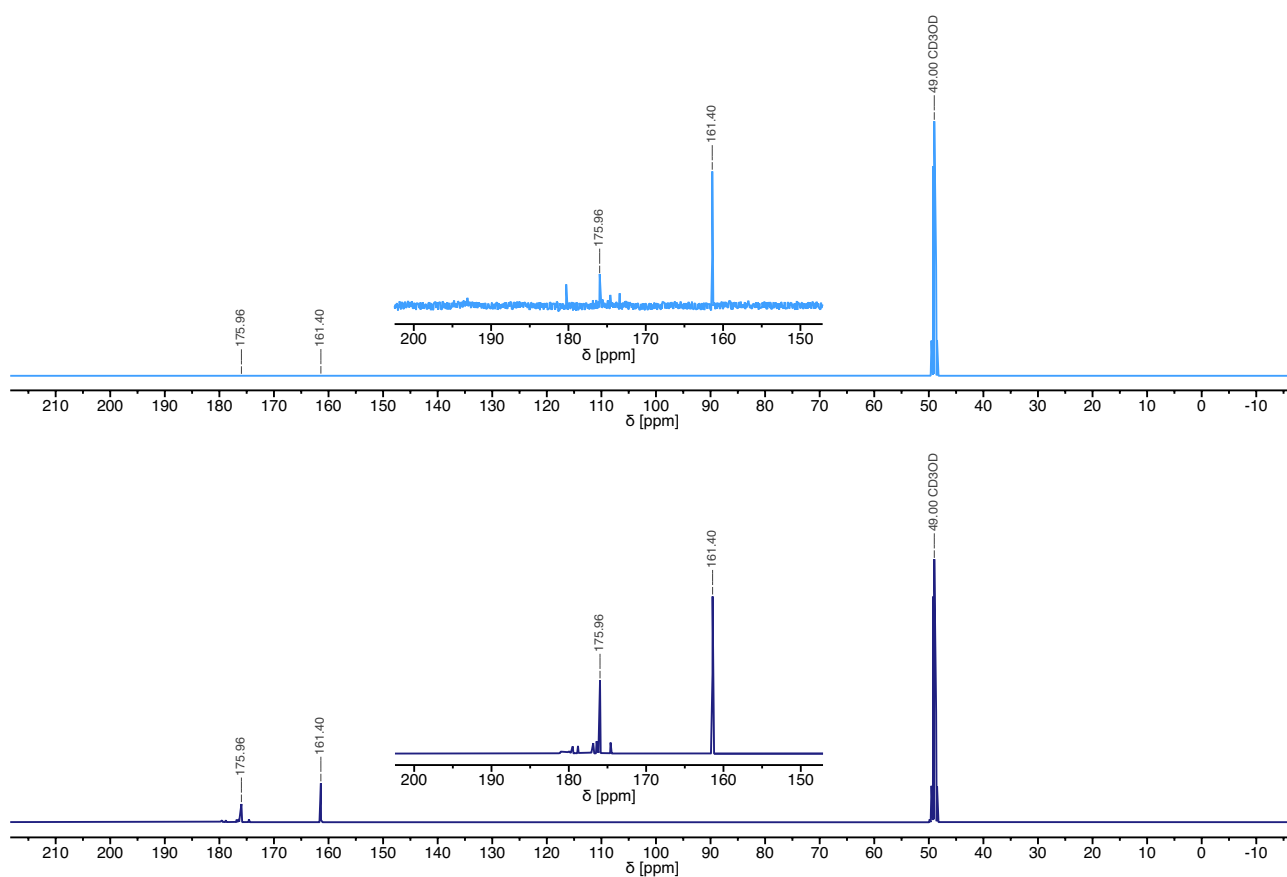

**Figure S32:**  $^{13}\text{C}$  NMR spectra of **1** +  $\text{KC}_8$  (1 equiv.) in methanol- $d_4$  under  $^{12}\text{CO}_2$  (1 atm, *light blue, top trace*) and  $^{13}\text{CO}_2$  (1 atm, *dark blue, bottom trace*).

## 5.5 Additional Spectra

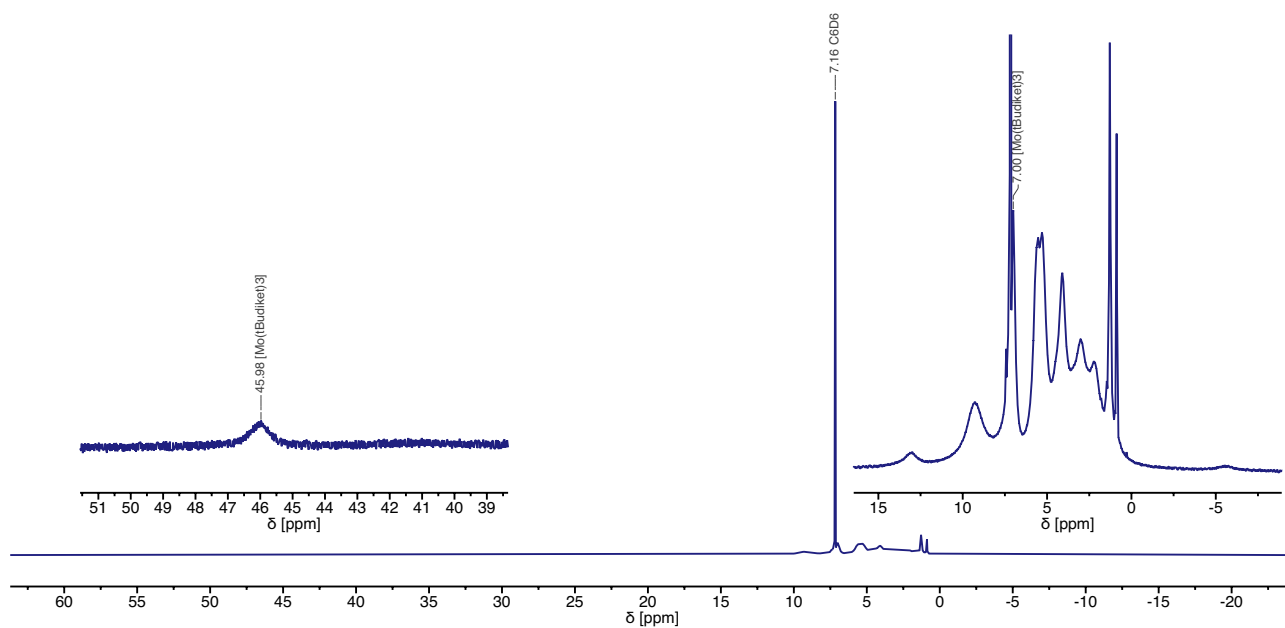

**Figure S33:**  $^1\text{H}$  NMR spectrum of  $\text{K}[\text{Mo}(\text{tBu-diket})_3]$  (crude) in  $\text{benzene-}d_6$ . Small amounts of **3** (indicated within the spectrum) could be removed by treatment with crown ether (18-crown-6 or 15-crown-5) which allowed for purification by recrystallization (see Figure S19 and Figure S20).

## 6. UV-Vis Spectra

### 6.1 <sup>Me</sup>diket Supported Complexes

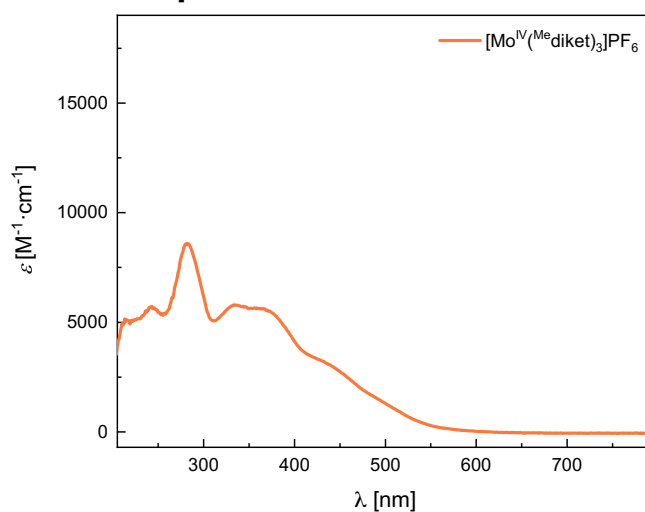

Figure S34: UV-Vis spectrum of  $[\text{Mo}(\text{Me diket})_3]\text{PF}_6$  in MeCN ( $d = 2$  mm).

### 6.2 <sup>tBu</sup>diket Supported Complexes

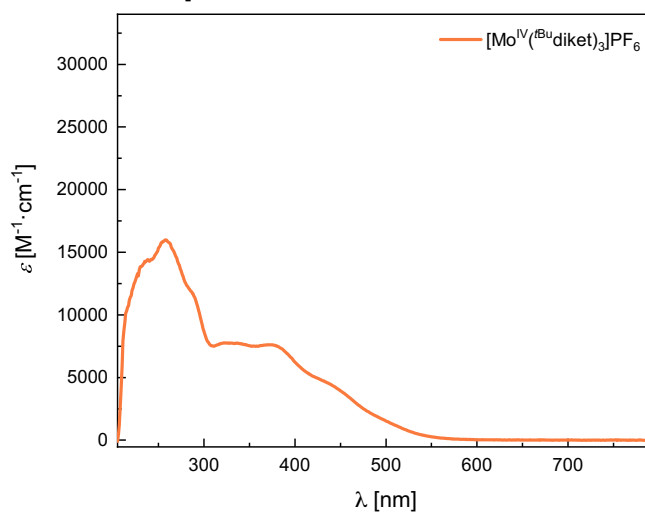

Figure S35: UV-Vis spectrum of  $[\text{Mo}(\text{tBu diket})_3]\text{PF}_6$  in THF ( $d = 2$  mm).

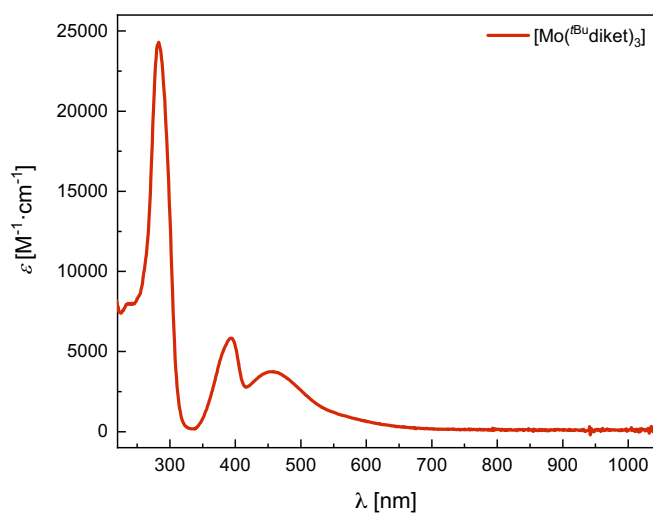

Figure S36: UV-Vis spectrum of  $[\text{Mo}(\text{tBu diket})_3]$  in THF ( $d = 2$  mm).

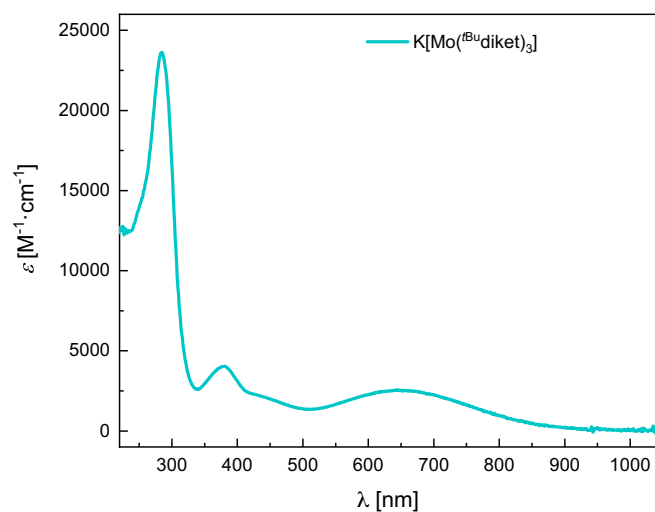

**Figure S37:** UV-Vis spectrum of  $\text{K}[\text{Mo}(\text{tBu-diket})_3]$  in THF ( $d = 2 \text{ mm}$ ).

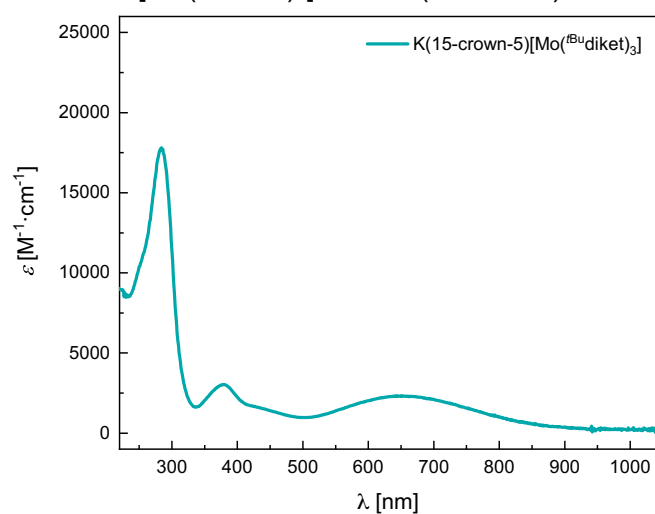

**Figure S38:** UV-Vis spectrum of  $\text{K}(15\text{-crown-5})[\text{Mo}(\text{tBu-diket})_3]$  in THF ( $d = 2 \text{ mm}$ ).

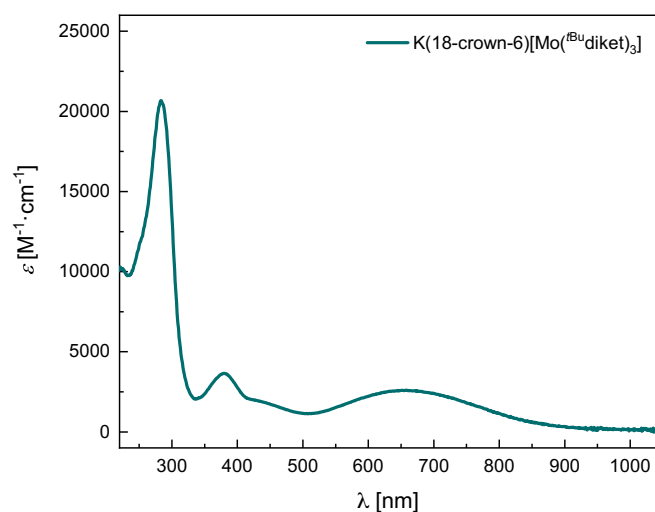

**Figure S39:** UV-Vis spectrum of  $\text{K}(18\text{-crown-6})[\text{Mo}(\text{tBu-diket})_3]$  in THF ( $d = 2 \text{ mm}$ ).

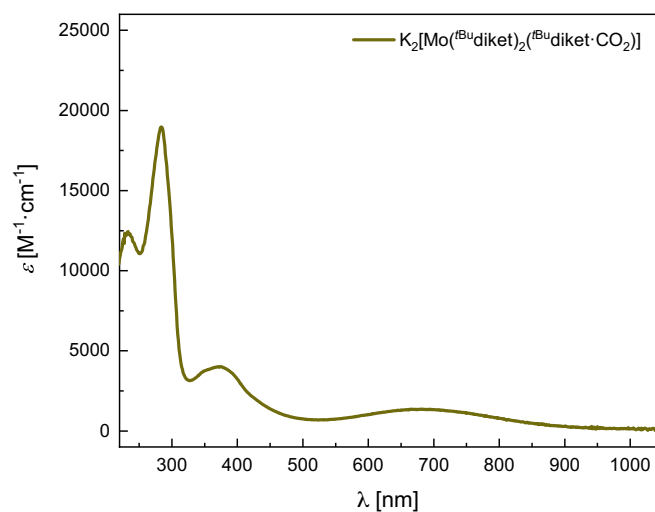

**Figure S40:** UV-Vis spectrum of  $\text{K}_2[\text{Mo}(\text{}^t\text{Bu-diket})_2(\text{}^t\text{Bu-diket}\cdot\text{CO}_2)]$  in THF ( $d = 2$  mm).

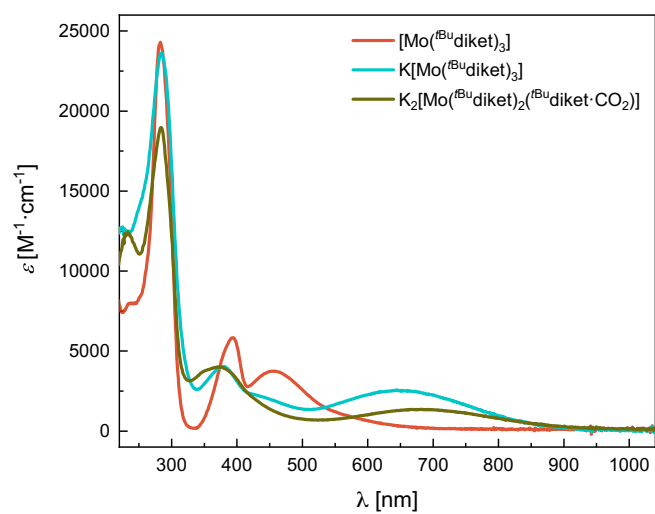

**Figure S41:** Overlaid UV-Vis spectra of  $[\text{Mo}(\text{}^t\text{Bu-diket})_3]$ ,  $\text{K}[\text{Mo}(\text{}^t\text{Bu-diket})_3]$  and  $\text{K}_2[\text{Mo}(\text{}^t\text{Bu-diket})_2(\text{}^t\text{Bu-diket}\cdot\text{CO}_2)]$ , respectively, in THF ( $d = 2$  mm).

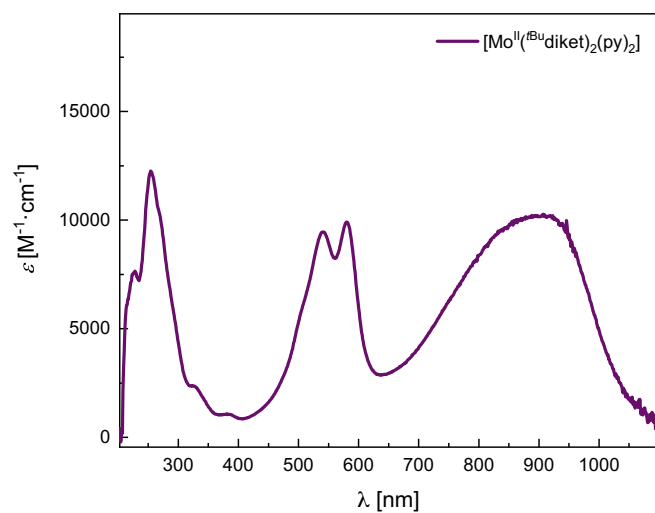

**Figure S42:** UV-Vis spectrum of  $[\text{Mo}(\text{}^t\text{Bu-diket})_2(\text{py})_2]$  in THF ( $d = 2$  mm).

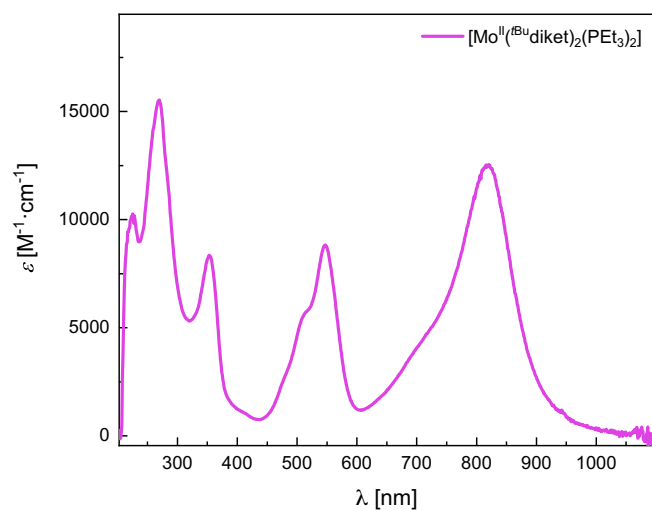

Figure S43: UV-Vis spectrum of  $[\text{Mo}^{\text{IV}}(\text{tBu-diket})_2(\text{PEt}_3)_2]$  in THF ( $d = 2$  mm).

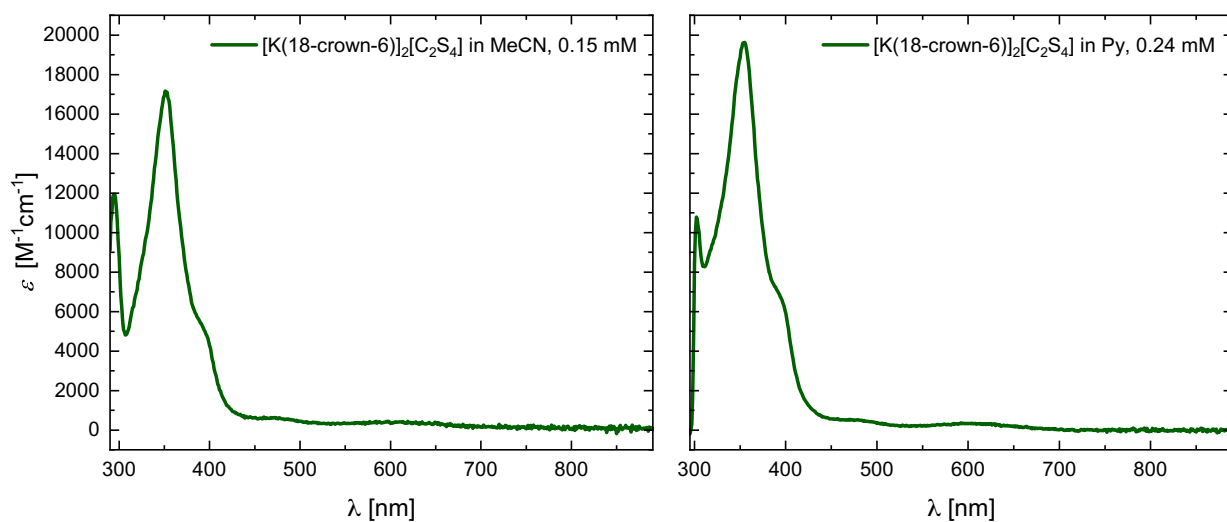

Figure S44: UV-Vis spectrum of  $[\text{K}(18\text{-crown-6})]_2[\text{C}_2\text{S}_4]$  in MeCN (*left*) and pyridine (*right*) ( $d = 2$  mm).



## 7. Infrared (IR) Spectroscopy

### 7.1 Reactivity of **5** with $^{12/13}\text{CO}_2$

#### 7.1.1 Spectra

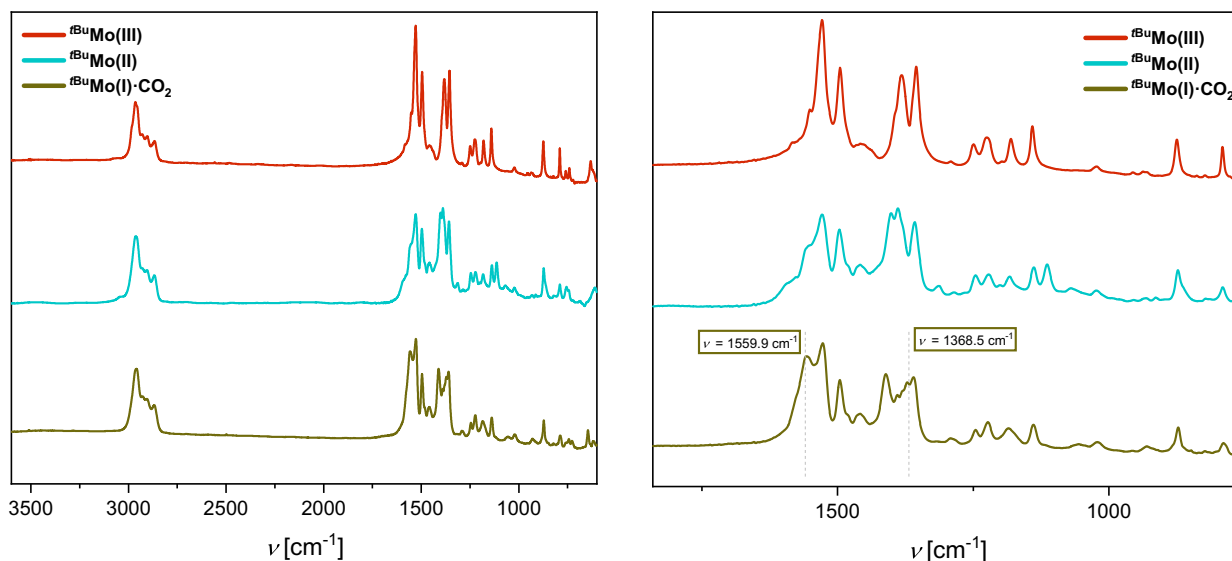

**Figure S45:** IR spectra of  $[\text{Mo}(\text{tBu-diket})_3]$  (top, red),  $\text{K}[\text{Mo}(\text{tBu-diket})_3]$  (middle, light turquoise), and  $\text{K}_2[\text{Mo}(\text{tBu-diket})_2(\text{tBu-diket-}^{12}\text{CO}_2)]$  (bottom, green).

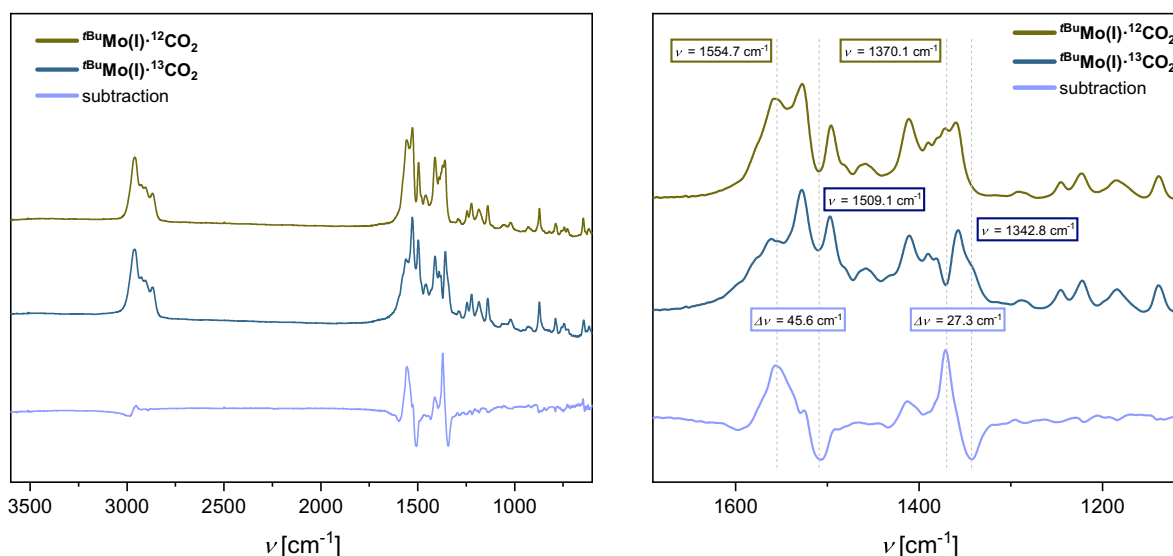

**Figure S46:** IR spectra of  $\text{K}_2[\text{Mo}(\text{tBu-diket})_2(\text{tBu-diket-}^{12}\text{CO}_2)]$  (top, green), and  $\text{K}_2[\text{Mo}(\text{tBu-diket})_2(\text{tBu-diket-}^{13}\text{CO}_2)]$  (middle, turquoise). The subtraction of the two spectra is displayed below (light blue).

The observed shift in IR vibration upon  $^{13}\text{C}$  labelling was predicted by Hook's law (Equation 1):

$$\tilde{\nu} = \frac{1}{2\pi c} \sqrt{\frac{f(m_1+m_2)}{m_1 m_2}} \quad (\text{Equation 1})$$

**Table S11:** Measured and predicted shift of IR vibrations upon  $^{13}\text{C}$  labelling of **6**.

| vibration | $\nu_{\text{meas}} (^{12}\text{C}) [\text{cm}^{-1}]$ | $\nu_{\text{meas}} (^{13}\text{C}) [\text{cm}^{-1}]$ | $\Delta\nu_{\text{meas}} [\text{cm}^{-1}]$ | $\Delta\nu_{\text{predicted}} [\text{cm}^{-1}]$ |
|-----------|------------------------------------------------------|------------------------------------------------------|--------------------------------------------|-------------------------------------------------|
| C-O       | 1554.7                                               | 1509.1                                               | 45.6                                       | 34.5                                            |
| C-C       | 1370.1                                               | 1342.8                                               | 27.3                                       | 26.6                                            |

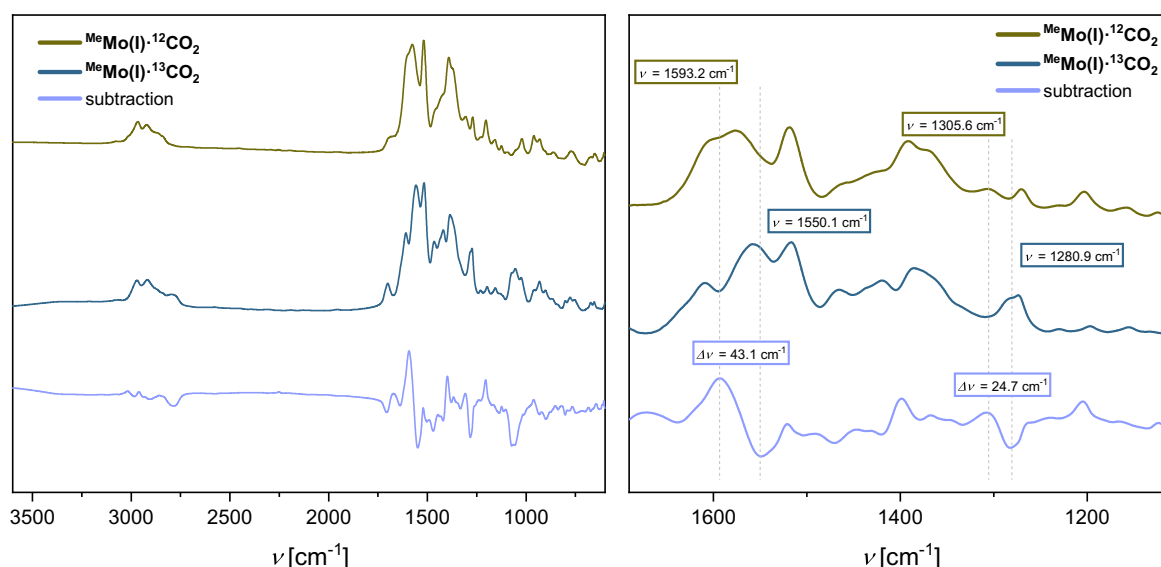

**Figure S47:** IR spectra of chemically reduced **1** exposed to  $^{12}\text{CO}_2$  (top, green), and  $^{13}\text{CO}_2$  (middle, turquoise). The subtraction of the two spectra is displayed below (light blue).

**Table S12:** Measured and predicted shift of IR vibrations upon  $^{13}\text{C}$  labelling.

| vibration | $\nu_{\text{meas}} (^{12}\text{C}) [\text{cm}^{-1}]$ | $\nu_{\text{meas}} (^{13}\text{C}) [\text{cm}^{-1}]$ | $\Delta\nu_{\text{meas}} [\text{cm}^{-1}]$ | $\Delta\nu_{\text{predicted}} [\text{cm}^{-1}]$ |
|-----------|------------------------------------------------------|------------------------------------------------------|--------------------------------------------|-------------------------------------------------|
| C-O       | 1593.2                                               | 1550.2                                               | 43.0                                       | 35.4                                            |
| C-C       | 1305.6                                               | 1280.9                                               | 24.7                                       | 25.4                                            |

## 7.2 Reactivity of **5** with $^{12/13}\text{CS}_2$

### 7.2.1 Procedure

To a solution of  $\text{K}[\text{Mo}(\text{}^t\text{Bu} \text{diket})_3]$  (14 mg, 0.020 mmol) in THF was added a 0.1 M stock solution of  $^{12}\text{CS}_2$  (or  $^{13}\text{CS}_2$ ) in THF (220  $\mu\text{L}$ , 0.022 mmol, 1.1 equiv.). After an instantly occurring color change from dark green to red/brown, all volatiles were removed under reduced pressure. The remaining dark brown residue was diluted with KBr, pressed into a pellet, and analyzed by FT-IR spectroscopy.

### 7.2.2 Spectra

The recorded IR spectra are displayed in Figure S48. Upon addition of  $\text{CS}_2$  to  $\text{K}[\text{Mo}(\text{}^t\text{Bu} \text{diket})_3]$  (yellow spectrum),  $[\text{Mo}(\text{}^t\text{Bu} \text{diket})_3]$  is formed as the main product (compare with red spectrum). The subtraction (light blue spectrum) of spectra obtained from reactivity with either  $^{12}\text{CS}_2$  (yellow spectrum) or  $^{13}\text{CS}_2$  (orange spectrum) reveals the red shift of mainly one single band from 990  $\text{cm}^{-1}$  to 962  $\text{cm}^{-1}$ . This band is assigned to the asymmetric  $\text{CS}_2$  vibration of the  $[\text{C}_2\text{S}_4]^{2-}$  dianion, based on the comparison with isolated  $[\text{K}(18\text{-crown-6})]_2[\text{C}_2\text{S}_4]$  (green spectrum), and in agreement with literature.<sup>16-19</sup>

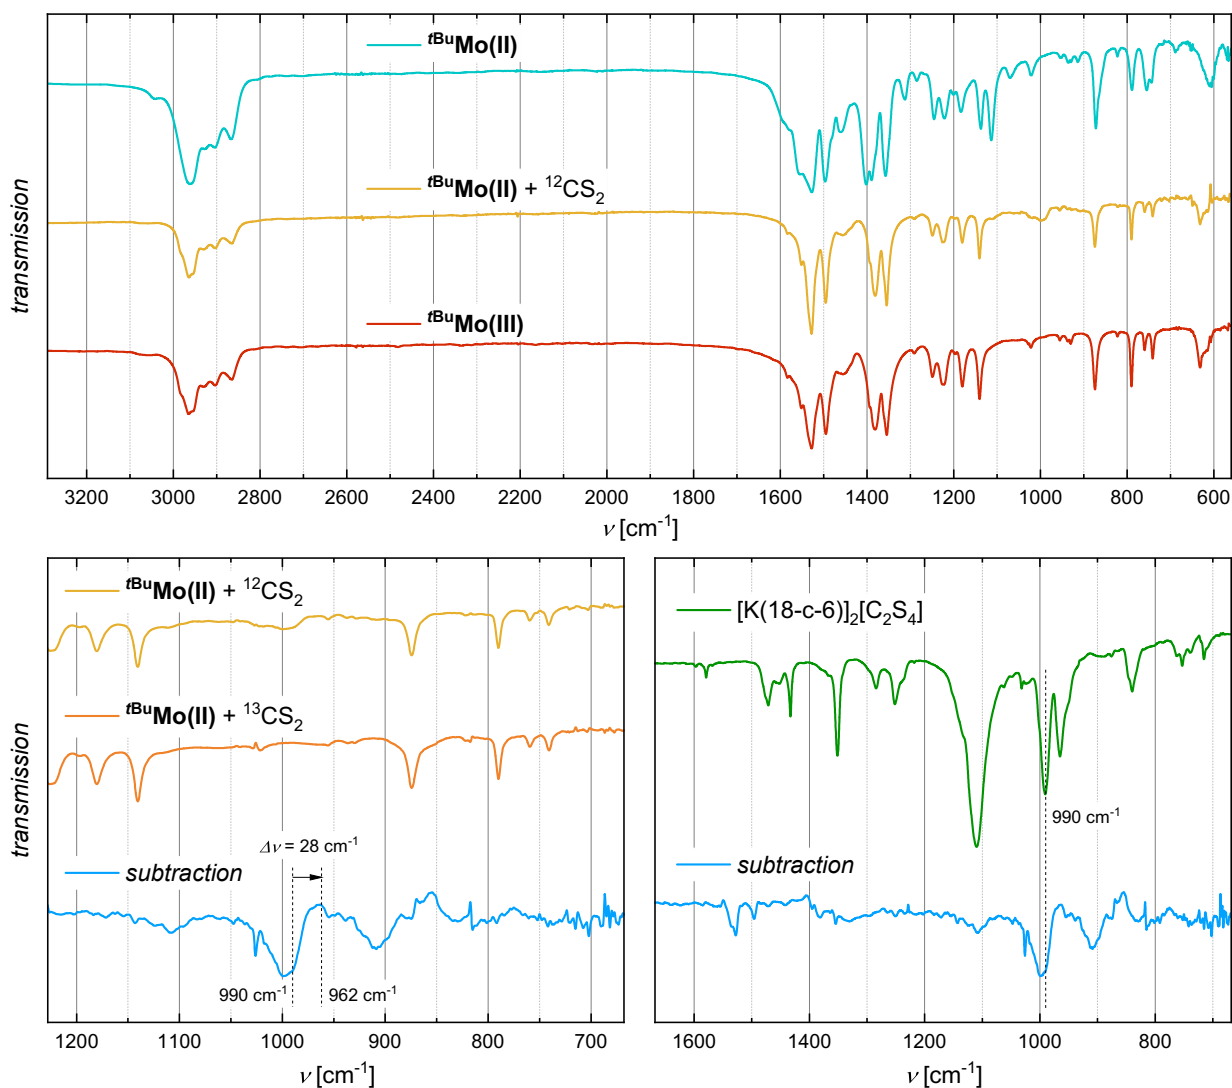

**Figure S48:** FT-IR spectra of reactivity studies with  $^{12/13}\text{CS}_2$  (KBr pellet). The spectrum in *light blue* corresponds to the subtraction of the spectra obtained from  $\text{K}[\text{Mo}(\text{tBu}^{\text{diket}})_3] + ^{12}\text{CS}_2$  (*yellow*) and  $\text{K}[\text{Mo}(\text{tBu}^{\text{diket}})_3] + ^{13}\text{CS}_2$  (*orange*). The spectra of  $\text{K}[\text{Mo}(\text{tBu}^{\text{diket}})_3]$  (*turquoise*),  $[\text{Mo}(\text{tBu}^{\text{diket}})_3]$  (*red*) and  $[\text{K}(18\text{-crown-6})_2][\text{C}_2\text{S}_4]$  were obtained from independently isolated compounds. More details are given in the text above.

**Table S13:** Measured and predicted shift of IR vibrations for the reaction of **5** with  $^{12/13}\text{CS}_2$ .

| vibration | $\nu_{\text{meas}} (^{12}\text{C}) [\text{cm}^{-1}]$ | $\nu_{\text{meas}} (^{13}\text{C}) [\text{cm}^{-1}]$ | $\Delta\nu_{\text{meas}} [\text{cm}^{-1}]$ | $\Delta\nu_{\text{predicted}} [\text{cm}^{-1}]$ |
|-----------|------------------------------------------------------|------------------------------------------------------|--------------------------------------------|-------------------------------------------------|
| C-C       | 990                                                  | 962                                                  | 28                                         | 19                                              |

## 8. EPR Spectroscopy

### 8.1 EPR Spectrum of 6

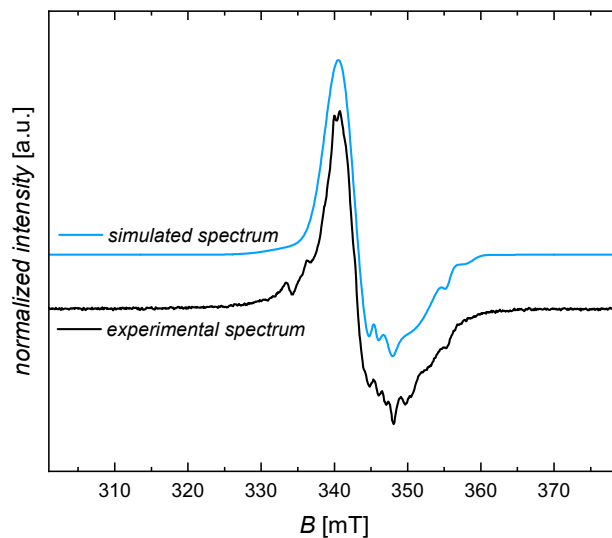

**Figure S49:** X-Band EPR spectrum of  $\text{K}_2[\text{Mo}(\text{tBu diket})_2(\text{tBu diket}\cdot\text{CO}_2)]$  (black) and its simulated spectrum (blue). Collection parameters:  $c = 2$  mM (in 2-MeTHF),  $T = 20$  K, microwave frequency 9.5 GHz. Simulation parameters:  $S = 1/2$ ,  $g = (1.994, 1.979, 1.932)$ ,  $A(^{95/97}\text{Mo}) = (63.6, 48.8, 73.3)$  with  $g$ -strains of (0.026, 0.023, 0.035) and  $A$ -strains of (37.4, 59.4, 94.9).

## 9. Theoretical Calculation of 6

### 9.1 Method

Density functional theory (DFT) calculations were performed with the Gaussian program package.<sup>20</sup> Geometry optimization and single point calculation (frequency analysis) were carried out with the unrestricted pbe functional. The sdd basis set was used for Mo and the Def2SVP basis set used for all light atoms (C, H, O). For simplicity, the potassium counter cation was omitted, and the calculation was run on a charged complex (2x negatively charged). The graphics containing the molecular orbitals and spin density (difference between  $\alpha$  and  $\beta$  spins) were generated using the ChemCraft software (Version 1.8).<sup>21</sup>

### 9.2 Spin Density Plot

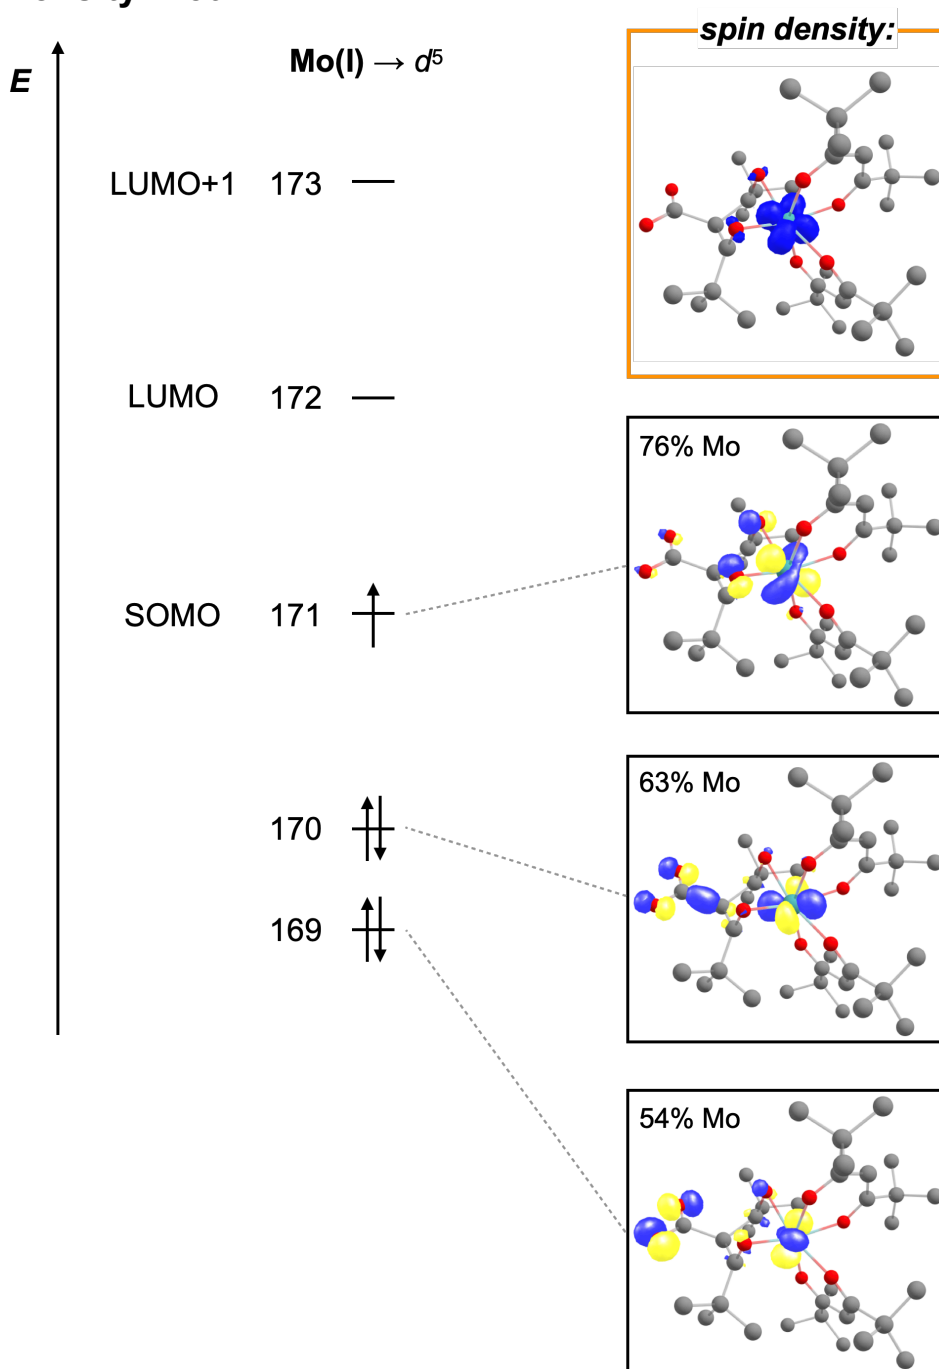

**Figure S50:** Qualitative molecular orbital diagram of  $[\text{Mo}(\text{tBu-diket})_2(\text{tBu-diket}\cdot\text{CO}_2)]^{2-}$  with the most relevant molybdenum-based molecular orbitals (black boxes) and the spin density (orange box).

## 9.3 Coordinates of Optimized Geometry

|    |            |            |            |
|----|------------|------------|------------|
| Mo | -0.2008756 | -0.4445510 | -0.2217436 |
| O  | 1.3334619  | -1.7590220 | -0.9613730 |
| O  | -0.7009813 | -2.2350173 | 0.6490181  |
| O  | 1.3009256  | 0.0828204  | 1.2333021  |
| O  | -4.3958831 | -2.5748971 | -1.4334865 |
| O  | -1.1403358 | -1.3285750 | -1.8187484 |
| O  | 0.9147205  | 0.9832195  | -1.3773226 |
| O  | -4.2859572 | -3.0675015 | 0.7468799  |
| O  | -1.0337807 | 1.4117098  | 0.5840125  |
| C  | 4.6235116  | -3.4113989 | -0.7646298 |
| C  | 3.4092061  | -0.8598364 | 3.6705219  |
| C  | 2.3610382  | -4.3672203 | -1.2467596 |
| C  | 3.2252774  | -3.0999415 | -1.2953293 |
| C  | 4.6561225  | 0.6674139  | 2.1178189  |
| C  | 3.0573389  | -1.4001150 | 0.6303728  |
| C  | 3.2664718  | 0.2136295  | 2.5816463  |
| C  | 3.3270352  | -2.6089874 | -2.7451162 |
| C  | 2.4676385  | -2.0122797 | -0.4960842 |
| C  | 2.4568542  | -0.3853133 | 1.4025563  |
| C  | 2.5186627  | 1.4165086  | 3.1560192  |
| C  | -0.8546106 | -0.7702703 | 3.2444762  |
| C  | -2.2265077 | -2.8250440 | 2.9807802  |
| C  | -2.0290499 | -1.3820412 | 2.4821796  |
| C  | -1.7304061 | -1.4616172 | 0.9586992  |
| C  | 3.4992715  | 2.1766960  | -1.7716504 |
| C  | -3.3064088 | -0.5950559 | 2.7768644  |
| C  | -3.9263937 | -2.4546520 | -0.2827836 |
| C  | -2.8670868 | -1.3123013 | -0.0663184 |
| C  | 1.0719984  | 2.2294308  | -1.2835202 |
| C  | -1.1146148 | 3.2650388  | 2.8251148  |
| C  | -2.1531545 | -0.6949591 | -1.2728369 |
| C  | 2.1663835  | 2.7932517  | -2.2183708 |
| C  | -0.6557205 | 2.6052464  | 0.4641061  |
| C  | 1.8460201  | 2.3288318  | -3.6444918 |
| C  | 0.3592979  | 3.0645267  | -0.4072480 |
| C  | -1.4154270 | 3.6152460  | 1.3625014  |
| C  | 2.2796991  | 4.3166086  | -2.1966407 |
| C  | -2.9024733 | 0.2534028  | -2.2504057 |
| C  | -1.0330137 | 5.0751345  | 1.1151482  |
| C  | -2.0064032 | 1.4080634  | -2.7006660 |
| C  | -3.2656472 | -0.5882474 | -3.4874810 |
| C  | -2.9157263 | 3.4434447  | 1.1006701  |
| C  | -4.1975485 | 0.8000814  | -1.6505805 |
| H  | 5.0935402  | -4.1926366 | -1.3863693 |
| H  | 4.5916921  | -3.7846433 | 0.2709992  |
| H  | 3.9644036  | -1.7360634 | 3.3022617  |

|   |            |            |            |
|---|------------|------------|------------|
| H | 5.2781122  | -2.5254354 | -0.7891894 |
| H | 3.9462565  | -0.4541327 | 4.5463762  |
| H | 2.4190843  | -1.2068381 | 4.0035498  |
| H | 5.2590821  | -0.1686087 | 1.7336161  |
| H | 2.7928660  | -5.1567797 | -1.8864873 |
| H | 4.0574611  | -1.7167046 | 0.9178532  |
| H | 2.2880820  | -4.7540365 | -0.2179228 |
| H | 5.2090198  | 1.1235519  | 2.9579173  |
| H | 3.7719138  | -3.3868749 | -3.3898280 |
| H | 3.9554266  | -1.7052220 | -2.8126692 |
| H | 4.5768421  | 1.4164233  | 1.3145085  |
| H | 1.3405081  | -4.1378406 | -1.5849193 |
| H | -1.3046441 | -3.4041337 | 2.8155052  |
| H | 0.0593024  | -1.3512612 | 3.0525970  |
| H | -1.0550404 | -0.7815707 | 4.3321834  |
| H | 3.0919269  | 1.8532791  | 3.9919380  |
| H | 1.5245394  | 1.1240783  | 3.5191414  |
| H | -2.4583894 | -2.8298146 | 4.0634977  |
| H | 2.3261515  | -2.3559108 | -3.1223131 |
| H | -0.6605559 | 0.2618767  | 2.9225993  |
| H | -3.0474842 | -3.2852484 | 2.4084983  |
| H | 2.3638082  | 2.1884648  | 2.3875703  |
| H | 3.4150312  | 1.0811561  | -1.7258722 |
| H | 3.7784688  | 2.5328467  | -0.7667270 |
| H | -3.4798270 | -0.5483868 | 3.8677900  |
| H | 4.3101099  | 2.4478559  | -2.4702314 |
| H | -0.0423327 | 3.3835746  | 3.0481694  |
| H | -4.1646975 | -1.1005352 | 2.3079262  |
| H | -1.3891922 | 2.2226506  | 3.0354578  |
| H | -3.2401554 | 0.4381711  | 2.3996357  |
| H | 1.7349887  | 1.2359167  | -3.6673031 |
| H | -3.4841607 | -0.4940299 | 0.3337131  |
| H | -1.6843454 | 3.9229464  | 3.5043611  |
| H | 2.6501554  | 2.6263333  | -4.3397925 |
| H | 0.5834118  | 4.1258225  | -0.4176107 |
| H | 2.5476578  | 4.6937471  | -1.1972301 |
| H | 0.0291121  | 5.2651762  | 1.3356212  |
| H | 0.9002098  | 2.7685187  | -3.9990685 |
| H | -1.0525749 | 1.0171136  | -3.0831863 |
| H | 3.0669247  | 4.6433742  | -2.8974852 |
| H | -2.3473073 | -0.9533377 | -3.9722180 |
| H | -3.8606131 | -1.4545120 | -3.1587583 |
| H | -3.2113671 | 2.3975819  | 1.2588750  |
| H | -1.7810078 | 2.1017116  | -1.8780897 |
| H | -4.0089900 | 1.3880028  | -0.7391294 |
| H | 1.3368791  | 4.7972152  | -2.5013630 |
| H | -1.6307998 | 5.7296420  | 1.7721238  |
| H | -4.8762689 | -0.0314708 | -1.4080755 |

|   |            |           |            |
|---|------------|-----------|------------|
| H | -1.2270464 | 5.3772707 | 0.0741208  |
| H | -3.5031790 | 4.0866056 | 1.7782718  |
| H | -3.1711968 | 3.7097753 | 0.0628598  |
| H | -2.4980796 | 1.9800294 | -3.5097193 |
| H | -3.8325838 | 0.0241471 | -4.2147072 |
| H | -4.7015209 | 1.4607692 | -2.3796732 |



## 10. Electrochemistry

### 10.1 CV Studies

All CV experiments were performed in an argon-filled glovebox (Vigor) using a conventional three electrode single-compartment cell, connected to a SP300 Bio-Logic potentiostat (Bio-Logic Science Instruments SAS). A Ag/AgNO<sub>3</sub> (10 mM AgNO<sub>3</sub> in 0.1 M TBAPF<sub>6</sub> in CH<sub>3</sub>CN) reference electrode was used which was protected by a guard compartment separated by a Vycor® frit. All potentials were referenced to an internal ferrocene/ferrocenium standard, added in the last step of each experiment. A 3 mm diameter glassy carbon electrode (GCE, BASi) was used as the working electrode. Electrodes were polished on wet polishing cloth using a 1 μm diamond suspension and a 0.05 μm alumina slurry before each set of experiments. The scan rate was 100 mV·s<sup>-1</sup> unless otherwise noted. The half-wave potentials ( $E_{1/2}$ ) were defined as the weighing average of the corresponding cathodic peak potential ( $E_c$ ) and anodic peak potential ( $E_a$ ) for reversible processes. In all CV studies, 1 mM solutions of compound in CH<sub>3</sub>CN or THF containing 0.1 M TBAPF<sub>6</sub> as supporting electrolyte were used, unless otherwise noted. For CV experiments under CO<sub>2</sub>, the electrolyte solution was purged with purified CO<sub>2</sub> for 20 min (10 mL·min<sup>-1</sup>) prior to the measurement.

#### 10.1.1 CV of 1

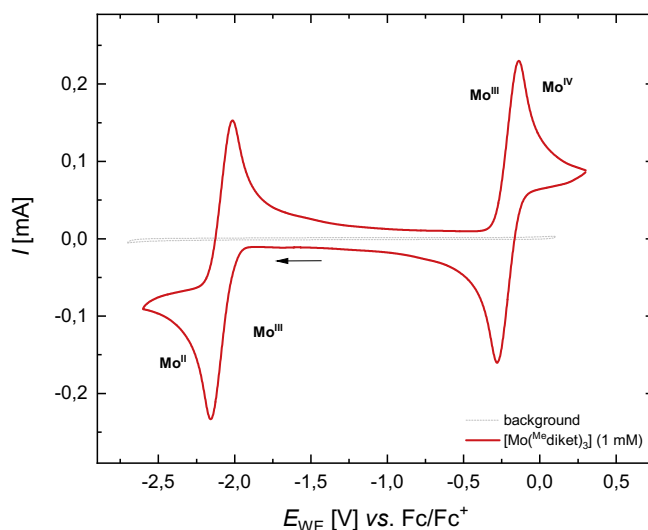

**Figure S51:** CV (scan rate  $\nu = 100 \text{ mV}\cdot\text{s}^{-1}$ , 2<sup>nd</sup> scan) of [Mo(<sup>Me</sup>diket)<sub>3</sub>] (1 mM) in TBAPF<sub>6</sub>/MeCN (0.1 M). A TBAPF<sub>6</sub>/MeCN (0.1 M) background measurement is displayed as a grey dotted line, formal Mo oxidation states are indicated in black.

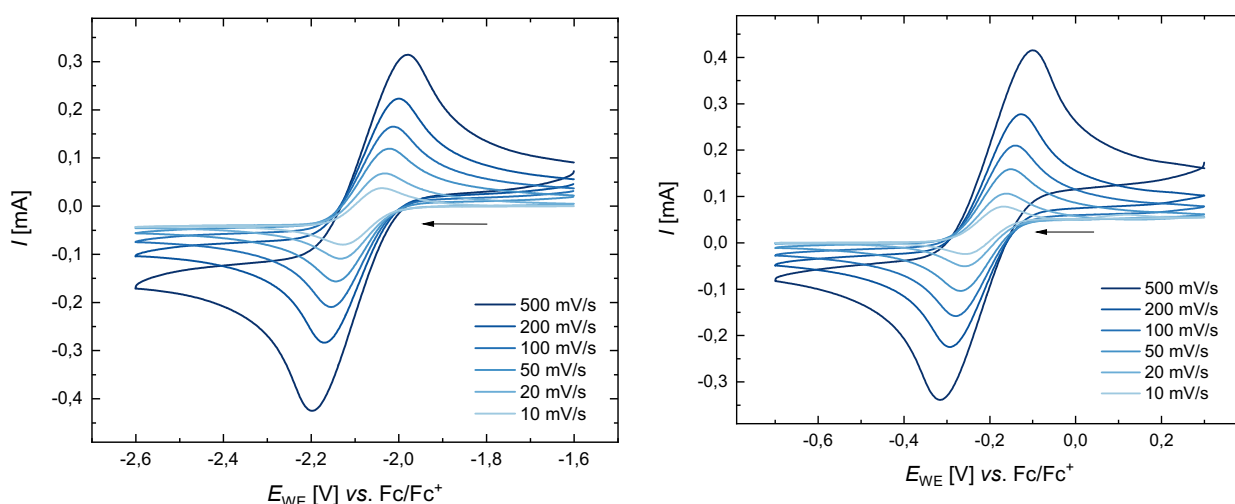

**Figure S52:** CV of [Mo(<sup>Me</sup>diket)<sub>3</sub>] (1 mM) in TBAPF<sub>6</sub>/MeCN (0.1 M) with varying scan rate  $\nu$  (see Figure legend) of the Mo(III)/Mo(II) (*left*) and of the Mo(III)/Mo(IV) redox couple (*right*).

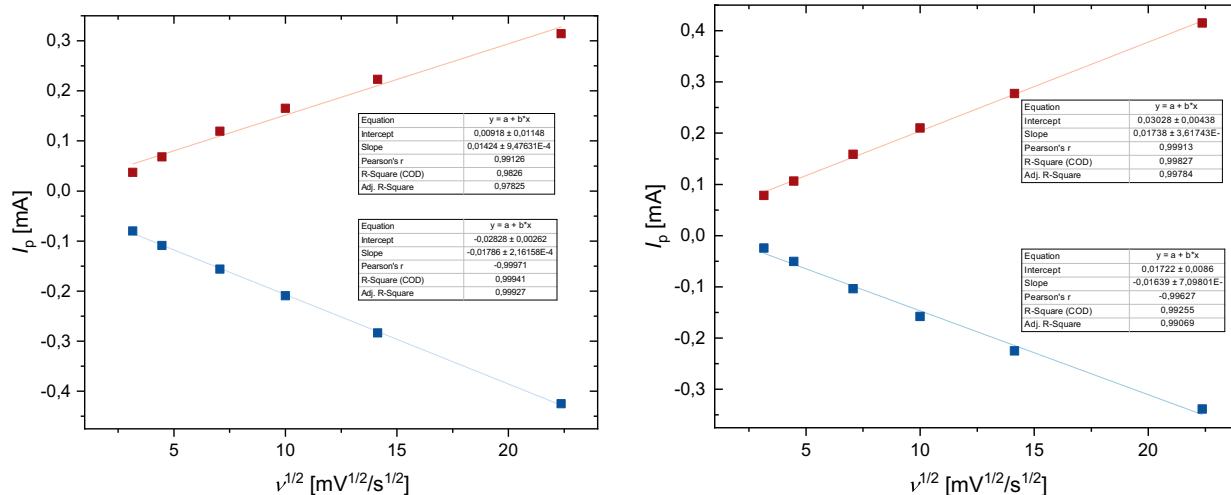

**Figure S53:** Randles-Ševčík plot of  $[\text{Mo}(\text{Me}^{\text{diket}})_3]$  (1 mM) in  $\text{TBAPF}_6/\text{MeCN}$  (0.1 M) of the Mo(III)/Mo(II) (left) and of the Mo(III)/Mo(IV) redox couple (right).

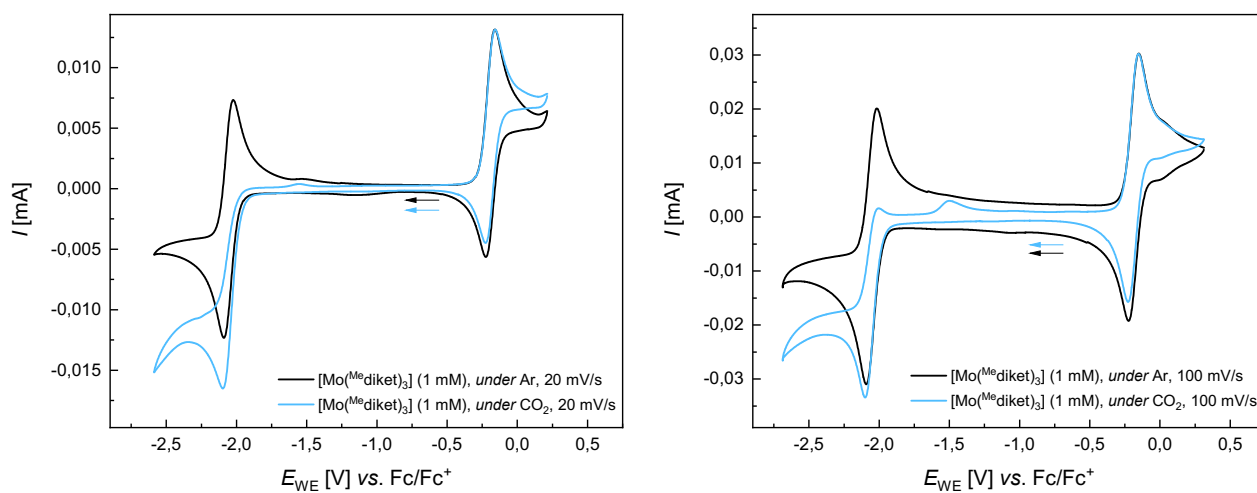

**Figure S54:** CV (2<sup>nd</sup> scan) of  $[\text{Mo}(\text{Me}^{\text{diket}})_3]$  (1 mM) in  $\text{TBAPF}_6/\text{MeCN}$  (0.1 M) under argon (black trace) and under  $\text{CO}_2$  (light blue trace) at  $v = 20 \text{ mV} \cdot \text{s}^{-1}$  (left) and  $v = 100 \text{ mV} \cdot \text{s}^{-1}$  (right).

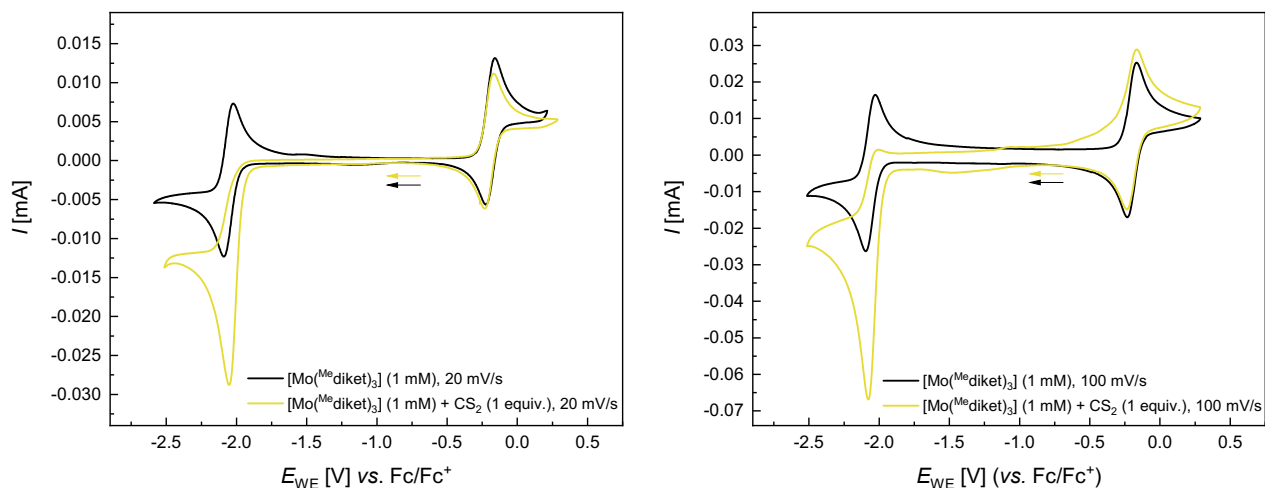

**Figure S55:** CV (2<sup>nd</sup> scan) of [Mo(<sup>Me</sup>diket)<sub>3</sub>] (1 mM) in TBAPF<sub>6</sub>/MeCN (0.1 M) under argon (*black trace*) and in presence of 1 equiv. of CS<sub>2</sub> (*yellow trace*) at  $\nu = 20 \text{ mV}\cdot\text{s}^{-1}$  (*left*) and  $\nu = 100 \text{ mV}\cdot\text{s}^{-1}$  (*right*).

### 10.1.2 CV of 2

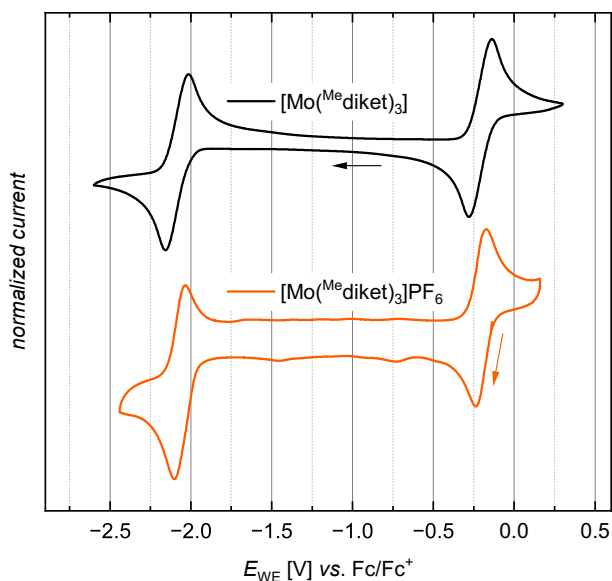

**Figure S56:** CV of [Mo<sup>III</sup>(<sup>Me</sup>diket)<sub>3</sub>] (*black trace*) and [Mo<sup>VI</sup>(<sup>Me</sup>diket)<sub>3</sub>]PF<sub>6</sub> (*orange trace*) at a scan rate  $\nu = 100 \text{ mV}\cdot\text{s}^{-1}$  in TBAPF<sub>6</sub>/MeCN (0.1 M).

### 10.1.3 CV of 3

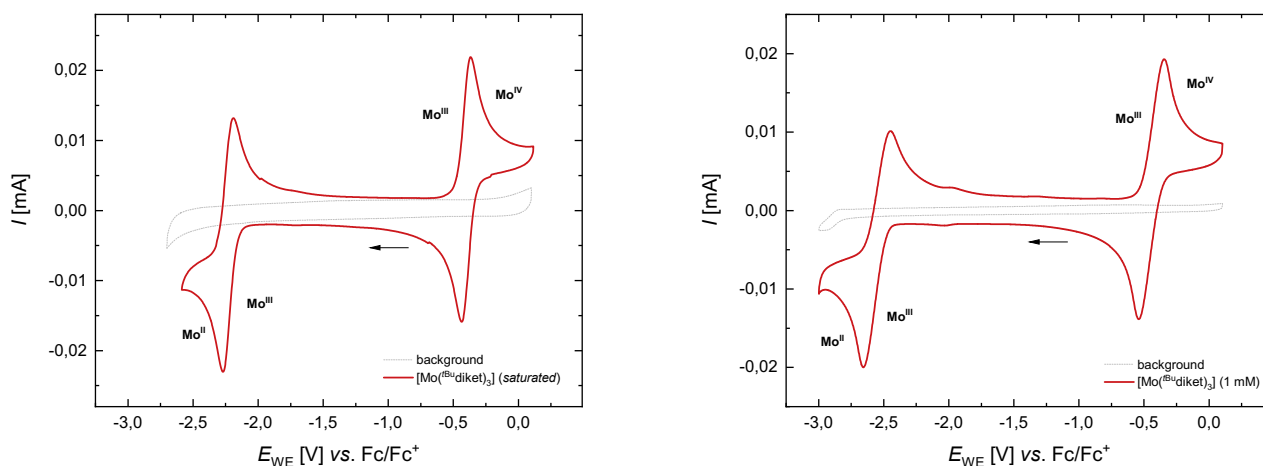

**Figure S57:** CV (scan rate  $\nu = 100 \text{ mV}\cdot\text{s}^{-1}$ , 2<sup>nd</sup> scan) of [Mo(<sup>tBu</sup>diket)<sub>3</sub>] in TBAPF<sub>6</sub>/MeCN (0.1 M) (*left*) TBAPF<sub>6</sub>/THF (0.1 M) (*right*). A TBAPF<sub>6</sub>/MeCN (0.1 M) and TBAPF<sub>6</sub>/THF (0.1 M) background measurement is displayed as a grey dotted line, formal Mo oxidation states are indicated in black. Note that the solubility of [Mo(<sup>tBu</sup>diket)<sub>3</sub>] in TBAPF<sub>6</sub>/MeCN (0.1 M) is  $< 1 \text{ mM}$ .

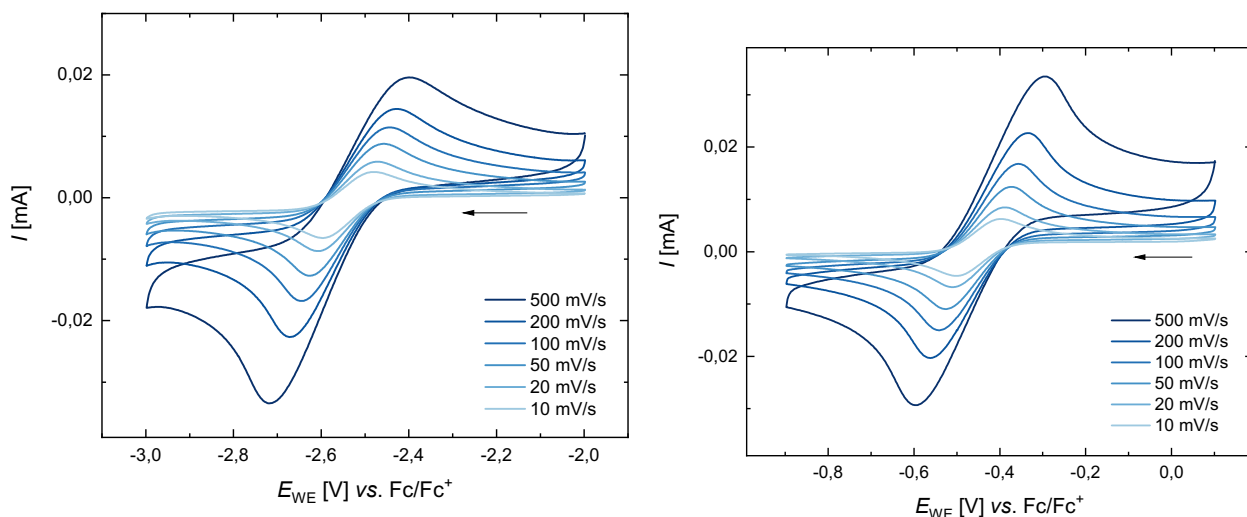

**Figure S58:** CV of  $[\text{Mo}(\text{tBu})\text{diket}]_3$  (1 mM) in  $\text{TBAPF}_6/\text{THF}$  (0.1 M) with varying scan rate  $\nu$  (see Figure legend) of the Mo(III)/Mo(II) (left) and of the Mo(III)/Mo(IV) redox couple (right).

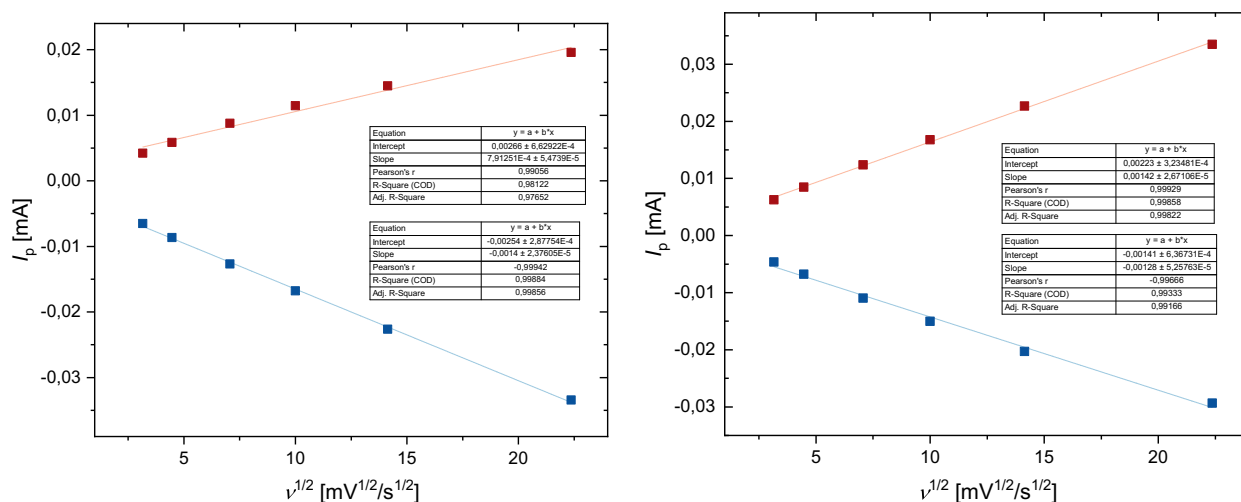

**Figure S59:** Randles-Ševčík plot of  $[\text{Mo}(\text{tBu})\text{diket}]_3$  (1 mM) in  $\text{TBAPF}_6/\text{THF}$  (0.1 M) of the Mo(III)/Mo(II) (left) and of the Mo(III)/Mo(IV) redox couple (right).

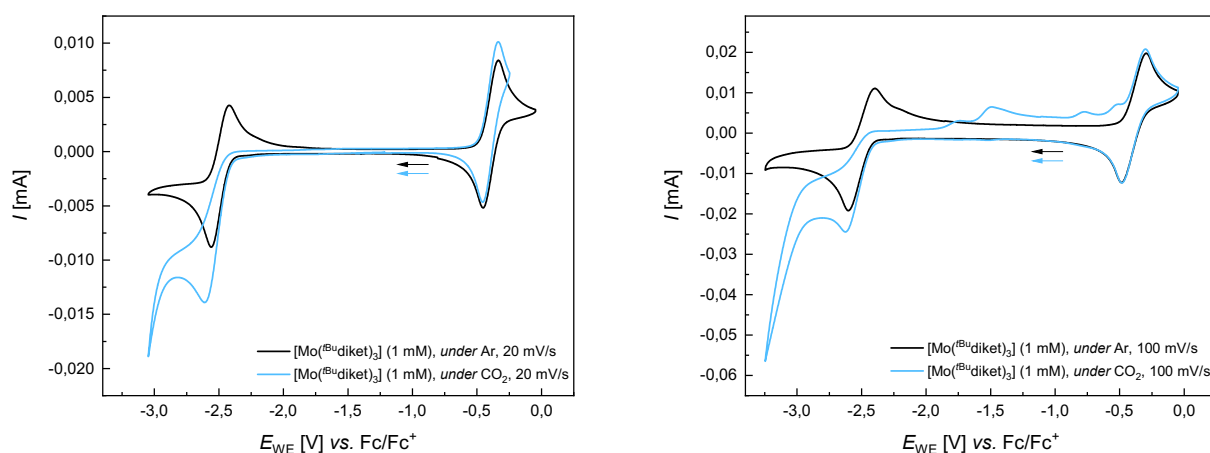

**Figure S60:** CV (2<sup>nd</sup> scan) of  $[\text{Mo}(\text{tBu})\text{diket}]_3$  (1 mM) in  $\text{TBAPF}_6/\text{THF}$  (0.1 M) under argon (black trace) and under  $\text{CO}_2$  (light blue trace) at  $\nu = 20 \text{ mV} \cdot \text{s}^{-1}$  (left) and  $\nu = 100 \text{ mV} \cdot \text{s}^{-1}$  (right).

### 10.1.4 CV of 6

$\text{K}_2[\text{Mo}(\text{}^t\text{Bu-diket})_2(\text{}^t\text{Bu-diket}\cdot\text{CO}_2)]$  (**6**) was analyzed by cyclic voltammetry in  $\text{TBAPF}_6/\text{THF}$  (0.1 M). Two irreversible oxidations are observed at  $E_{\text{ox}} = -1.80$  V and  $-1.54$  V (vs.  $\text{Fc}/\text{Fc}^+$ ). The further signals are assigned to *in-situ* formed **3** based on the perfect overlap of corresponding redox potentials.

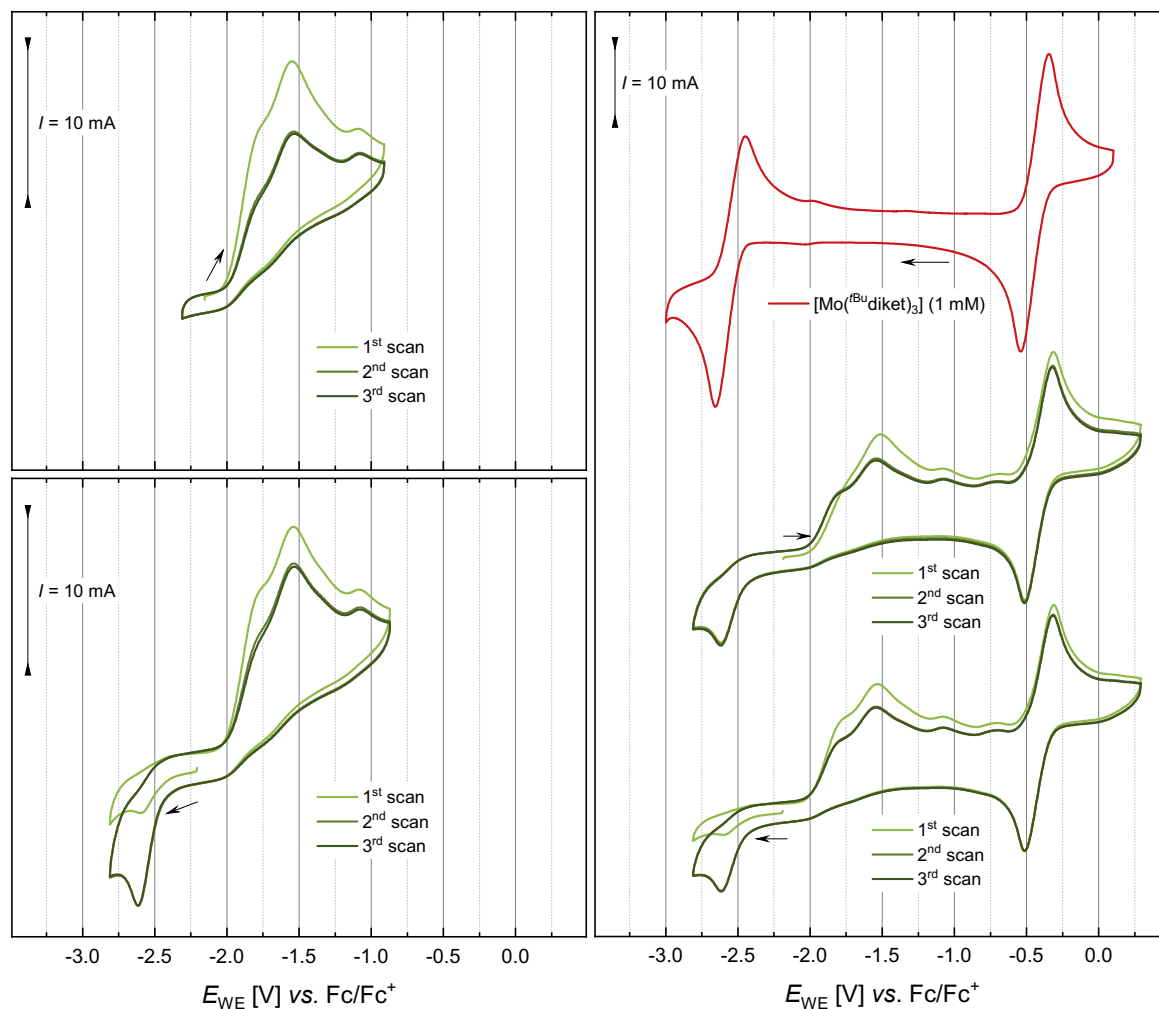

**Figure S61:** *left:* CV of  $\text{K}_2[\text{Mo}(\text{}^t\text{Bu-diket})_2(\text{}^t\text{Bu-diket}\cdot\text{CO}_2)]$  (1 mM) in  $\text{TBAPF}_6/\text{THF}$  (0.1 M) at a scan rate of  $\nu = 100$   $\text{mV}\cdot\text{s}^{-1}$  in anodic (*top*) and cathodic (*bottom*) scan direction. *right:* Comparison of CV of  $[\text{Mo}(\text{}^t\text{Bu-diket})_3]$  (1 mM) and  $\text{K}_2[\text{Mo}(\text{}^t\text{Bu-diket})_2(\text{}^t\text{Bu-diket}\cdot\text{CO}_2)]$  (1 mM) in  $\text{TBAPF}_6/\text{THF}$  (0.1 M) at a scan rate of  $\nu = 100$   $\text{mV}\cdot\text{s}^{-1}$ .

### 10.2 Controlled Potential Electrolysis (CPE) under $\text{CO}_2$

CPE experiments were performed in an argon-filled glovebox (Vigor) using a custom-built two compartment H-type cell. The two compartments were separated by two Ceramic-PVDF Composite membranes (16  $\mu\text{m}$  thickness, Xuran). A 0.5 mm diameter platinum wire (10 cm length) was used as the counter electrode and placed in the anodic compartment. A glassy carbon plate electrode ( $A = 2$   $\text{cm}^2$ ), cut connected via a tantalum wire was used as the working electrode in the cathodic compartment. A  $\text{Ag}/\text{AgNO}_3$  (10 mM in 0.1 M  $\text{TBAPF}_6$  in  $\text{CH}_3\text{CN}$ ) reference electrode was used which was protected by a guard compartment separated by a Vycor® frit, also placed in the working compartment. Both compartments were filled with 6 mL of supporting electrolyte (0.1 M  $\text{TBAPF}_6/\text{CH}_3\text{CN}$ ). Constant magnetic stirring of 300 rpm with a small Teflon-coated stir bar was applied in both compartments during electrolysis. The applied potentials are referenced vs. the  $\text{Ag}/\text{AgNO}_3$  reference electrode and may vary slightly from experiment to experiment, owing to small variations of the reference electrode potential.

A 5 mM concentration of the substrate (*i.e.* 0.03 mmol) was used for all CPE experiments. For electrolyses under CO<sub>2</sub>, both compartments were purged with purified CO<sub>2</sub> for 20 min (10 mL·min<sup>-1</sup>).

A CV was recorded prior to CPE, in order to evaluate the optimal potential to be applied. After all, a constant potential of -2.1 V (vs. Ag/AgNO<sub>3</sub>) was applied for 2 h.

### 10.2.1 Attempted Product Identification

The strong paramagnetic nature of solutions combined with the presence of a 20-fold excess of supporting electrolyte hampered direct product identification by <sup>13</sup>C NMR; however, upon exposure of cathodic solutions to air after electrolysis, or alternatively extracting the reaction mixture taken to dryness with D<sub>2</sub>O, allowed removing the paramagnetic components and recording <sup>13</sup>C NMR spectrum. In both cases, signals in the range of 180 - 190 ppm were observed (Figure S62, *light blue* trace) which hinted to the formation of oxalate (C<sub>2</sub>O<sub>4</sub><sup>2-</sup>). The use of <sup>13</sup>CO<sub>2</sub> led to increased intensities of the latter signals (Figure S62, *dark blue* trace), however these results were hard to reproduce and did not allow to unambiguously assign the product to oxalate, nor was quantification possible. For comparison, Figure S8-3-1a shows the <sup>13</sup>C NMR spectrum after running an electrolysis under Ar and otherwise same conditions (Figure S62, *black* trace).

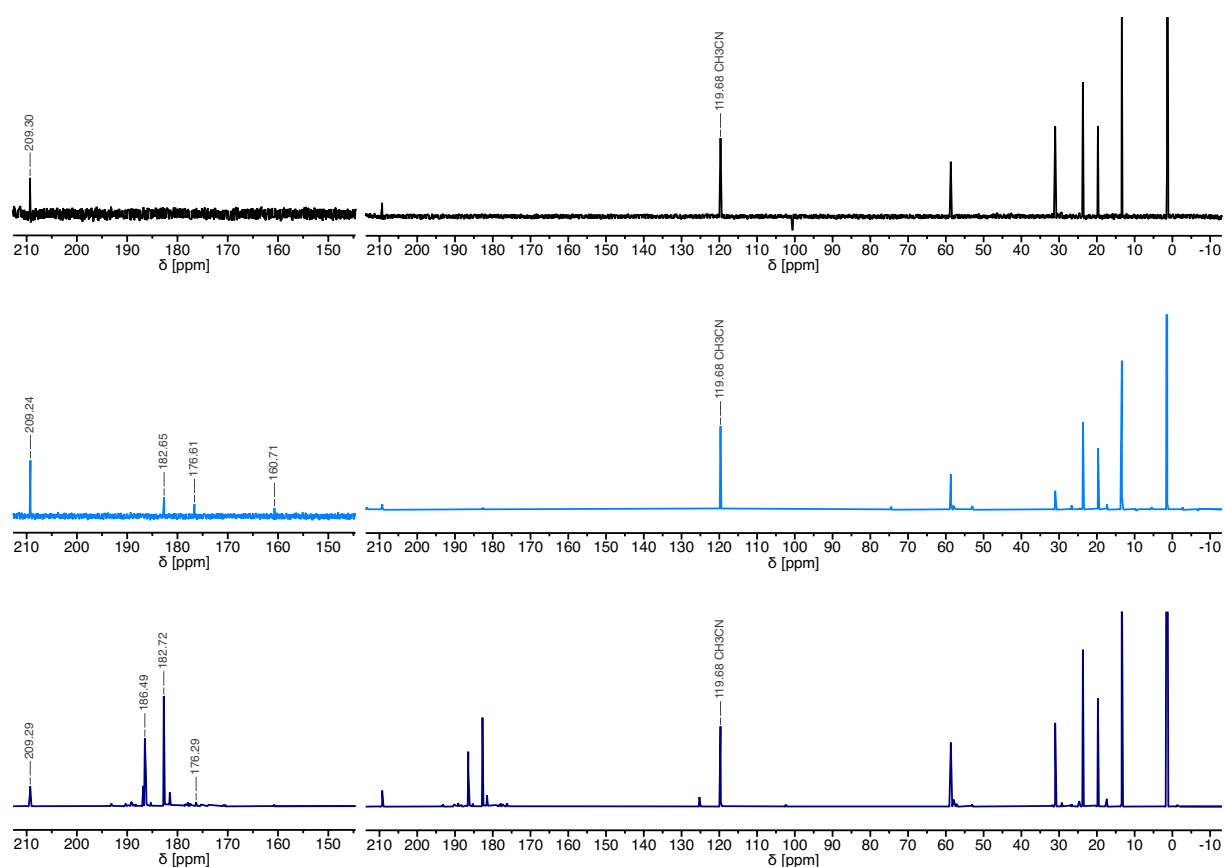

**Figure S62:** Analysis after CPE (under Ar (*black*), under CO<sub>2</sub> (*light blue*) and under <sup>13</sup>CO<sub>2</sub> (*dark blue*) by <sup>13</sup>C NMR spectroscopy, after extraction with D<sub>2</sub>O. On the left, a zoom on 210 ppm < δ < 150 ppm is displayed.

### 10.3 Controlled Potential Electrolysis (CPE) in Presence of CS<sub>2</sub>

The same setup and procedure as described in Section S8.2 was employed with minor modifications. In order to avoid potential overload due to very high current, the electrode surface of the working electrode was reduced to 0.5 cm<sup>2</sup> (instead of 2.0 cm<sup>2</sup>). In the case of CPE with TEABF<sub>4</sub>/MeCN (0.1 M) as the supporting electrolyte, glassy carbon foam was employed as the working electrode to prevent the deposition of insoluble product onto the

electrode, which led to rapid current decrease. In addition, CS<sub>2</sub> (101 μL, 1.68 mmol, 56 equiv.) was added to both the working- and the counter compartment (instead of purging with CO<sub>2</sub>). A constant potential of -2.0 V (vs. Ag/AgNO<sub>3</sub>) was applied for 2 h.

If TBAPF<sub>6</sub>/MeCN was employed as supporting electrolyte, the soluble product, [TBA]<sub>2</sub>[C<sub>2</sub>S<sub>4</sub>], remains in solution and undergoes further reaction with excess CS<sub>2</sub>, leading to decreased selectivity and lower overall yields for tetrathiooxalate. As recognized previously,<sup>19, 22</sup> use of tetraethyl ammonium (TEA) cations (e.g. TEABF<sub>4</sub>/MeCN as supporting electrolyte) was reported to have a beneficial impact on the selectivity for tetrathiooxalate, because [TEA]<sub>2</sub>[C<sub>2</sub>S<sub>4</sub>] is insoluble in MeCN and precipitates.

We have investigated the electrocatalytic reduction of CS<sub>2</sub> in presence of **3** in both supporting electrolytes (i.e. TBAPF<sub>6</sub>/MeCN or TEABF<sub>4</sub>/MeCN). With TBAPF<sub>6</sub>, unselective reduction of CS<sub>2</sub> was observed, leading to multiple products ([TBA]<sub>2</sub>[C<sub>2</sub>S<sub>4</sub>] (δ(<sup>13</sup>C) = 268.4 ppm) and [TBA]<sub>2</sub>[C<sub>3</sub>S<sub>5</sub>] (δ(<sup>13</sup>C) = 221.2 ppm, 149.1 ppm), among others). In TEABF<sub>4</sub>, the electroreduction proved to be much more selective, generating [TEA]<sub>2</sub>[C<sub>2</sub>S<sub>4</sub>] as a partly insoluble yellow solid (δ(<sup>13</sup>C) = 268.5 ppm).

### 10.3.1 Product Analysis

The solution of the working compartment was transferred to a 25 mL scintillation vial and all volatiles were removed under reduced pressure. The obtained dark solid was analyzed by NMR- and UV-Vis spectroscopy (Figure S63).

In case of CPE in TEABF<sub>4</sub>, the yellow precipitate was directly analyzed by <sup>13</sup>C NMR spectroscopy in methanol-*d*<sub>4</sub> (Figure S64) and identified as analytically pure [TEA]<sub>2</sub>[C<sub>2</sub>S<sub>4</sub>]. However, substantial amounts of tetrathiooxalate product remained in solution (<sup>13</sup>C NMR, Figure S65, and UV-Vis spectroscopy). For quantification, the analytically pure deposit as well as the whole working compartment (taken to dryness) were analyzed by UV-Vis spectroscopy in methanol (λ<sub>max</sub> = 345 nm, n<sub>tot</sub> = 0.12 mmol) (Figure S66). Given the amount of charge passed during the 2 h electrolysis (ΔQ = 28 C), a faradaic efficiency of 42% was calculated.

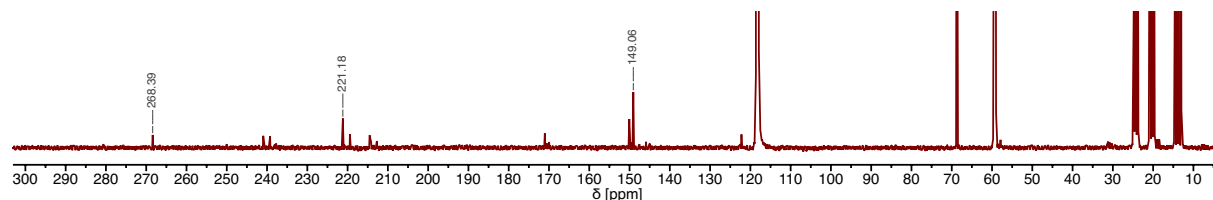

**Figure S63:** <sup>13</sup>C NMR spectrum after electrolysis in TBAPF<sub>6</sub>/MeCN (in MeCN-*d*<sub>3</sub>).

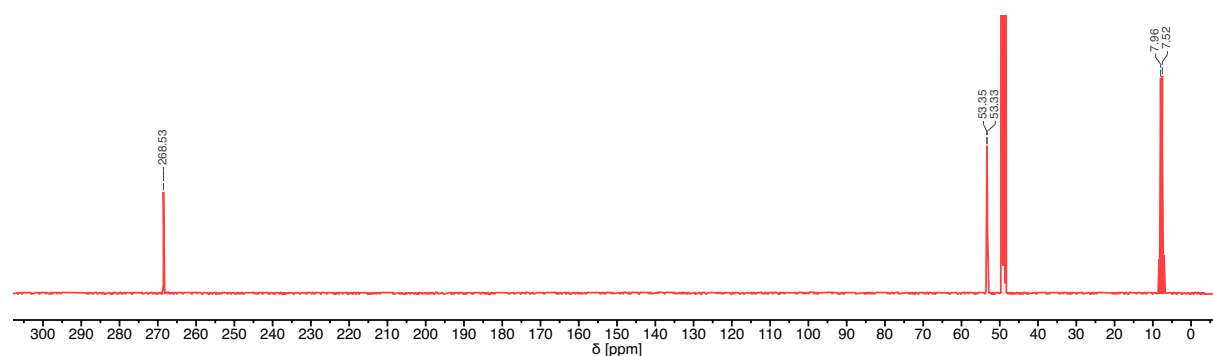

**Figure S64:** <sup>13</sup>C NMR spectrum of yellow precipitate formed after electrolysis in TEABF<sub>4</sub>/MeCN (in methanol-*d*<sub>4</sub>).

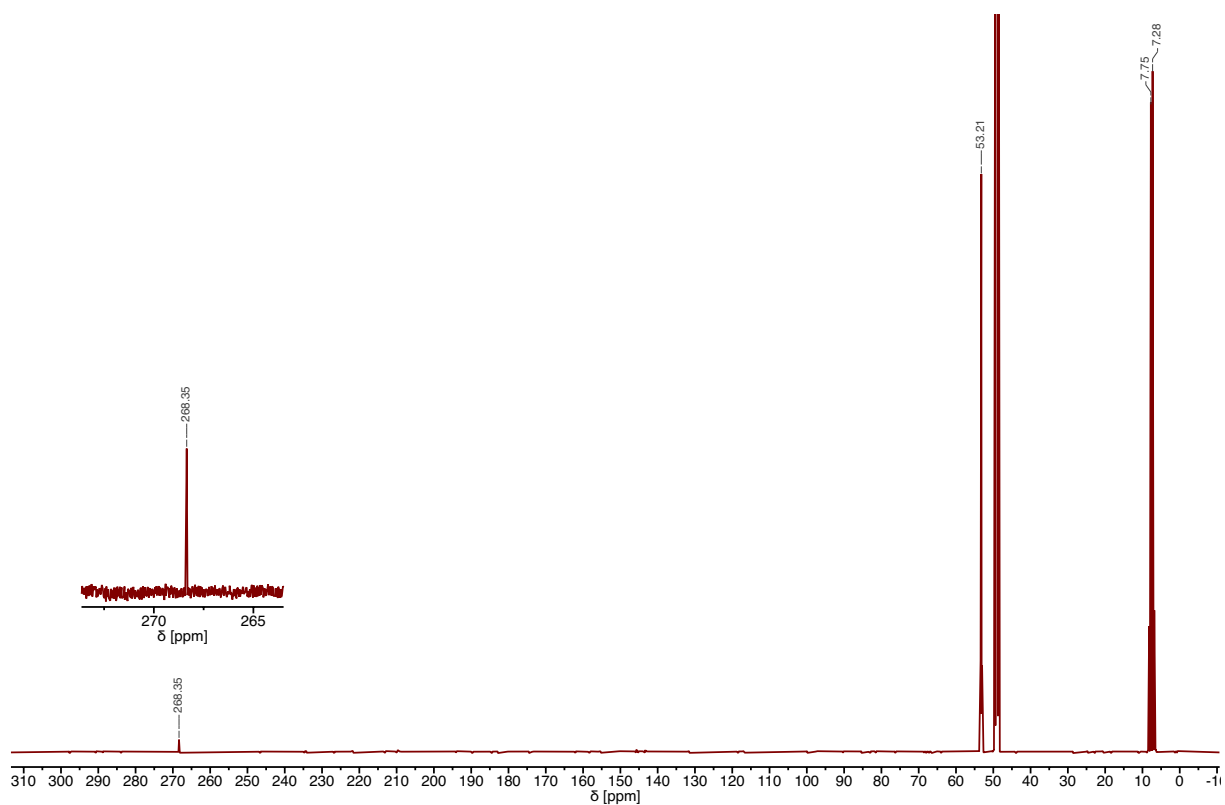

**Figure S65:**  $^{13}\text{C}$  NMR spectrum of the working compartment solution after electrolysis in  $\text{TEABF}_4/\text{MeCN}$  (taken to dryness, in methanol- $d_4$ ).

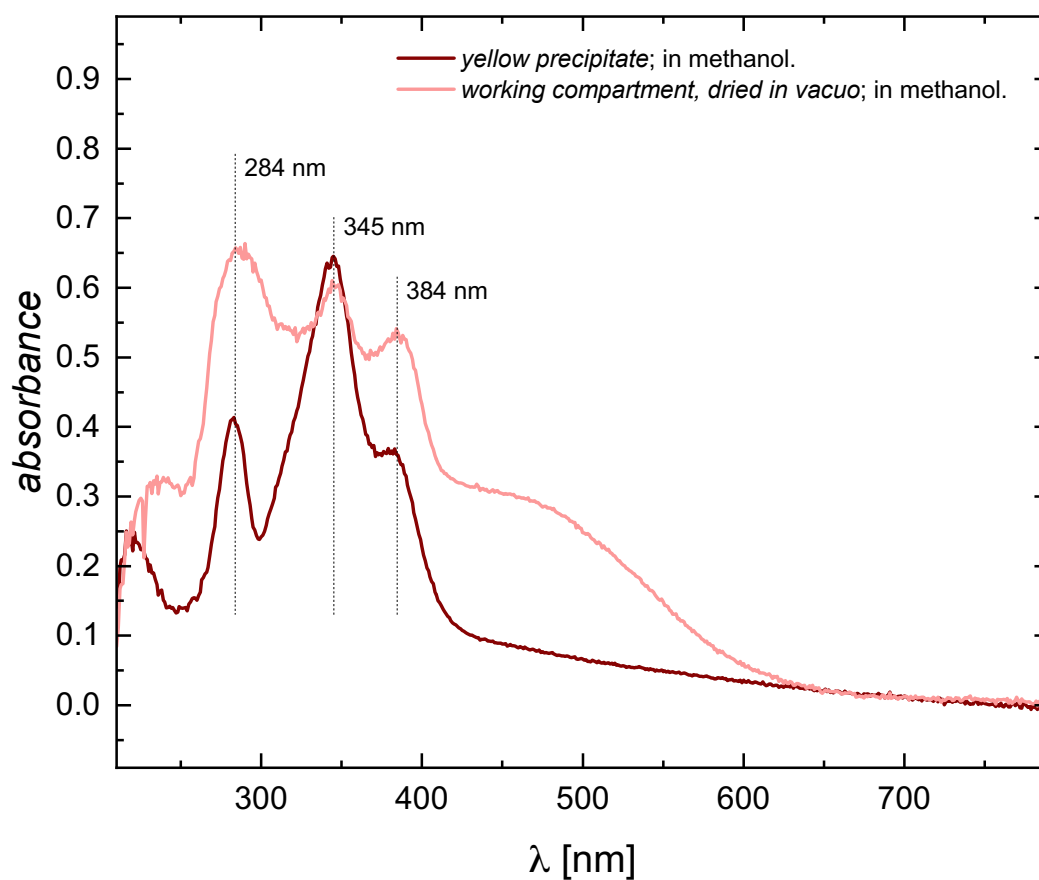

**Figure S66:** Product analysis after CPE (with  $\text{TEABF}_4$  as supporting electrolyte) by UV-Vis spectroscopy in methanol.



## 11. Proposed Reaction Mechanism

Here, we propose two mechanisms for the reactivity of **5** with either CO<sub>2</sub> or CS<sub>2</sub> (Scheme S2). The proposals are based on the observed overall disproportionation reaction, that is induced by CO<sub>2</sub> which stands in stark contrast to the formation of potassium tetrathiooxalate in presence of CS<sub>2</sub>. In both cases, a (not observed) CE<sub>2</sub>-bound Mo(II) intermediate ( $[\text{Mo}(\text{}^t\text{Bu}\text{diket})_2(\text{}^t\text{Bu}\text{diket}\cdot\text{CE}_2)]^{1-}$ ) is initially generated upon reaction of **5** with either CO<sub>2</sub> (E = O) or CS<sub>2</sub> (E = S). For E = O, we propose that this intermediate has a more anodic reduction potential (if compared to **5**) and hence undergoes a second reduction by another equivalent of **5**, leading to an overall formal disproportionation reaction. More facile reduction of  $[\text{Mo}(\text{}^t\text{Bu}\text{diket})_2(\text{}^t\text{Bu}\text{diket}\cdot\text{CO}_2)]^{1-}$  is indicated by the CV of **6** (Figure S61), displaying two irreversible oxidation waves in its anodic scan at potentials of -1.80 V and -1.54 V (vs. Fc/Fc<sup>+</sup>). These two oxidation events may be tentatively assigned to the oxidation of **6** to **3** via  $[\text{Mo}(\text{}^t\text{Bu}\text{diket})_2(\text{}^t\text{Bu}\text{diket}\cdot\text{CO}_2)]^{1-}$ . Overall, two equivalents of **5** are required for the generation of one equivalent of **6**.

A markedly different situation is encountered for E = S: in our proposed mechanism, the less electron withdrawing nature of the dithiocarboxylate group disfavors the further reduction to  $[\text{Mo}(\text{}^t\text{Bu}\text{diket})_2(\text{}^t\text{Bu}\text{diket}\cdot\text{CS}_2)]^{2-}$ . Instead, homolytic C-C bond scission leads to the release of **3** and a formal CS<sub>2</sub><sup>-</sup> radical anion, which readily dimerizes to the tetrathiooxalate dianion. Here, the intermediacy of  $[\text{Mo}(\text{}^t\text{Bu}\text{diket})_2(\text{}^t\text{Bu}\text{diket}\cdot\text{CS}_2)]^{1-}$  is justified by reactivity studies of the free ligand anion [<sup>t</sup>Budiket]<sup>-</sup> with <sup>13</sup>C CS<sub>2</sub>, where the formation of the dithiocarboxylated ligand is suggested by <sup>13</sup>C NMR spectroscopy (Section S3.5).

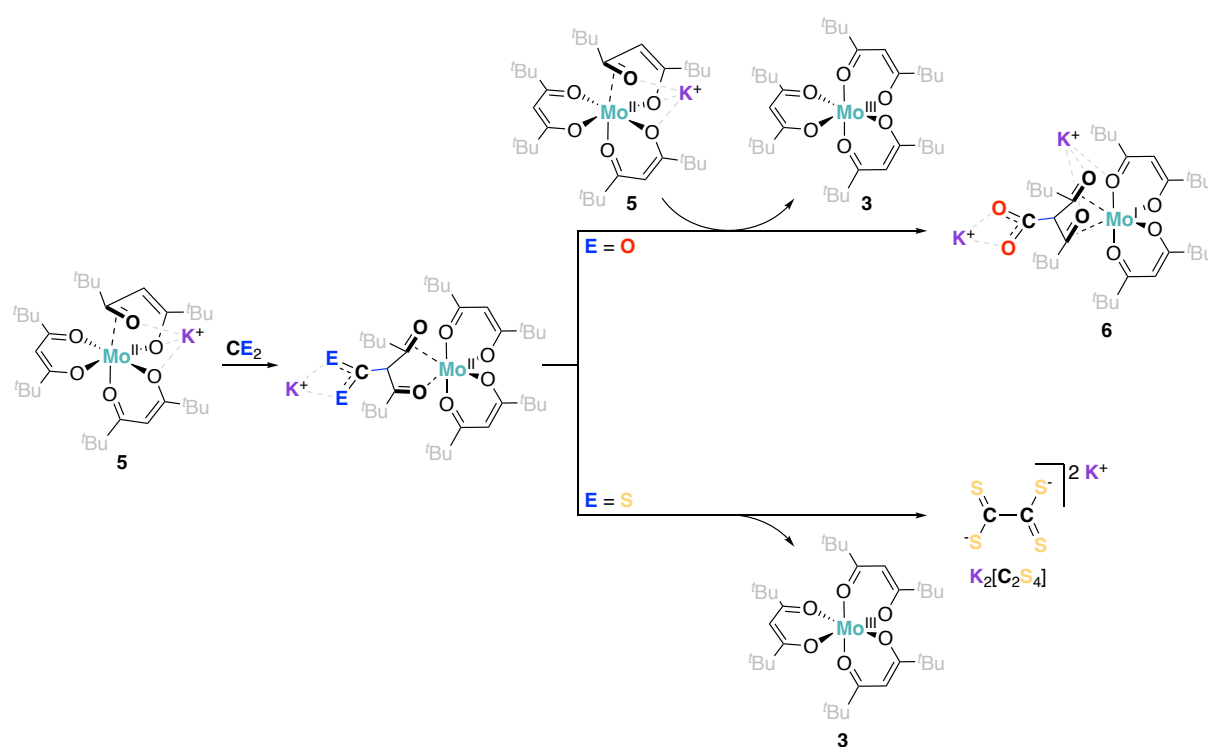

**Scheme S2:** Proposed mechanistic pathways for the formation of **6** vs.  $\text{K}_2[\text{C}_2\text{S}_4]$ .

## 12. References

- (1) Evans, D. F. 400. The determination of the paramagnetic susceptibility of substances in solution by nuclear magnetic resonance. *Journal of the Chemical Society (Resumed)* **1959**. DOI: 10.1039/jr9590002003.
- (2) Piguet, C. Paramagnetic Susceptibility by NMR: The "Solvent Correction" Removed for Large Paramagnetic Molecules. *Journal of Chemical Education* **1997**, *74* (7). DOI: 10.1021/ed074p815.
- (3) Stoll, S.; Schweiger, A. EasySpin, a comprehensive software package for spectral simulation and analysis in EPR. *J Magn Reson* **2006**, *178* (1), 42-55. DOI: 10.1016/j.jmr.2005.08.013.
- (4) Viculis, L. M.; Mack, J. J.; Mayer, O. M.; Hahn, H. T.; Kaner, R. B. Intercalation and exfoliation routes to graphite nanoplatelets. *J. Mater. Chem.* **2005**, *15* (9). DOI: 10.1039/b413029d.
- (5) Shibahara, T.; Yamasaki, M. A New Synthetic Route to Hexachloromolybdate(III). An X-Ray Structure of  $(\text{NH}_4)_3[\text{MoCl}_6]$ . *Bull. Chem. Soc. Jpn.* **1990**, *63* (10), 3022-3023. DOI: 10.1246/bcsj.63.3022.
- (6) Larson, M. L.; Moore, F. W. Synthesis and Properties of Molybdenum(III) Acetylacetonate. *Inorg. Chem.* **1962**, *1* (4), 856-859. DOI: 10.1021/ic50004a030.
- (7) Johnson, A.; Everett, G. W. Comparison of proton and deuteron nuclear magnetic resonance of some paramagnetic transition metal complexes. I. *Journal of the American Chemical Society* **1972**, *94* (5), 1419-1425. DOI: 10.1021/ja00760a001.
- (8) Tkachov, R.; Stepien, L.; Roch, A.; Komber, H.; Hennersdorf, F.; Weigand, J. J.; Bauer, I.; Kiriy, A.; Leyens, C. Facile synthesis of potassium tetrathiooxalate – The "true" monomer for the preparation of electron-conductive poly(nickel-ethylenetetrathiolate). *Tetrahedron* **2017**, *73* (16), 2250-2254. DOI: 10.1016/j.tet.2017.03.010.
- (9) Liebing, P.; Schmeide, M.; Kühling, M.; Witzorke, J. The Alkali Metal Salts of Methyl Xanthic Acid. *Eur. J. Inorg. Chem.* **2020**, *2020* (25), 2428-2434. DOI: 10.1002/ejic.202000258.
- (10) Andrez, J.; Pecaut, J.; Bayle, P. A.; Mazzanti, M. Tuning lanthanide reactivity towards small molecules with electron-rich siloxide ligands. *Angew. Chem. Int. Ed.* **2014**, *53* (39), 10448-10452. DOI: 10.1002/anie.201405031.
- (11) Bartoli, G.; Bosco, M.; Guerrieri, A.; Dalpozzo, R.; De Nino, A.; Iantorno, E.; Palmieri, G. Reaction of dianions of acyclic  $\beta$ -enamino ketones with electrophiles. vii. synthesis of 5-(monoalkylamino)-3-oxo  $\gamma,\delta$ -unsaturated acids and esters and of 3-(monoalkylamino)-5-oxo  $\beta,\gamma$ -unsaturated esters. *Gazz. Chim. Ital.* **1996**, *126* (1), 25-29.
- (12) Finger, L. H.; Guschlbauer, J.; Harms, K.; Sundermeyer, J. N-Heterocyclic Olefin-Carbon Dioxide and -Sulfur Dioxide Adducts: Structures and Interesting Reactivity Patterns. *Chem. Eur. J.* **2016**, *22* (45), 16292-16303. DOI: 10.1002/chem.201602973.
- (13) Dolomanov, O. V.; Bourhis, L. J.; Gildea, R. J.; Howard, J. A. K.; Puschmann, H. OLEX2: a complete structure solution, refinement and analysis program. *J. Appl. Crystal.* **2009**, *42* (2), 339-341. DOI: 10.1107/s0021889808042726.
- (14) Sheldrick, G. M. SHELXT - integrated space-group and crystal-structure determination. *Acta Cryst.* **2015**, *71* (Pt 1), 3-8. DOI: 10.1107/S2053273314026370.

- (15) Sheldrick, G. M. A short history of SHELX. *Acta Cryst.* **2008**, *64* (Pt 1), 112-122. DOI: 10.1107/S0108767307043930.
- (16) Bacher, A. D.; Sens, I.; Müller, U. Ein neuer Zugang zu Tetrathiooxalaten. Die Kristallstruktur von  $(\text{NEt}_4)_2[\text{C}_2\text{S}_4]$  / A Novel Access to Tetrathiooxalates. Crystal Structure of  $(\text{NEt}_4)_2[\text{C}_2\text{S}_4]$ . *Z. Naturforsch. B* **1992**, *47* (5), 702-705. DOI: 10.1515/znb-1992-0516.
- (17) Jeroschewski, P.; Hansen, P. Tetrathiooxalate-Darstellung, Eigenschaften und Reaktionen. *Sulfur Rep.* **1986**, *7* (1), 1-37. DOI: 10.1080/01961778608082501.
- (18) Breitzer, J. G.; Chou, J.-H.; Rauchfuss, T. B. A New Synthesis of Tetrathiooxalate and Its Conversion to  $\text{C}_3\text{S}_5^{2-}$  and  $\text{C}_4\text{S}_6^{2-}$ . *Inorg. Chem.* **1998**, *37* (8), 2080-2082. DOI: 10.1021/ic971327c.
- (19) Breitzer, J. G.; Holloway, G. A.; Rauchfuss, T. B.; Salata, M. R.; Kee, C. L.; Yan, Y. K. Electrochemical Synthesis of Tetraethylammonium Tetrathiooxalate. In *Inorganic Syntheses: Volume 36*, Inorganic Syntheses, 2014; pp 195-198.
- (20) *Gaussian 09, Revision A.02*; Wallingford CT, 2016. (accessed 23.07.2024).
- (21) *Chemcraft - graphical software for visualization of quantum chemistry computations. Version 1.8, build 682.* <https://www.chemcraftprog.com> (accessed 12.08.2024).
- (22) Jeroschewski, P. Elektrochemische Darstellung von Tetraalkylammoniumsalzen der Tetrathiooxaisäure. *Z. Chem.* **1981**, *21* (11), 412-412. DOI: 10.1002/zfch.19810211115.
